# Supplementary material for: How can we improve Comprehensive Geriatric Assessment for older people living with frailty in primary care and community settings? A qualitative study
Source: PubMed Central journal article supplement — BMJ Open. 2024 Mar 28;14(3):e081304. doi: 10.1136/bmjopen-2023-081304 (PMC10982782; doi:10.1136/bmjopen-2023-081304), 2024-03-28
Supplement: bmjopen-2023-081304.draft_revisions.pdf [file bmjopen-2023-081304.draft_revisions.pdf]

# BMJ Open

BMJ Open is committed to open peer review. As part of this commitment we make the peer review history of every article we publish publicly available.

When an article is published we post the peer reviewers' comments and the authors' responses online. We also post the versions of the paper that were used during peer review. These are the versions that the peer review comments apply to.

The versions of the paper that follow are the versions that were submitted during the peer review process. They are not the versions of record or the final published versions. They should not be cited or distributed as the published version of this manuscript.

BMJ Open is an open access journal and the full, final, typeset and author-corrected version of record of the manuscript is available on our site with no access controls, subscription charges or pay-per-view fees (<http://bmjopen.bmj.com>).

If you have any questions on BMJ Open's open peer review process please email [info.bmjopen@bmj.com](mailto:info.bmjopen@bmj.com)

# BMJ Open

## How can we improve Comprehensive Geriatric Assessment for older people living with frailty in primary care and community settings? A Qualitative Study

|                               |                                                                                                                                                                                                                                                                                                                                                                                                                                                                                                                                                                                                                                                                                                |
|-------------------------------|------------------------------------------------------------------------------------------------------------------------------------------------------------------------------------------------------------------------------------------------------------------------------------------------------------------------------------------------------------------------------------------------------------------------------------------------------------------------------------------------------------------------------------------------------------------------------------------------------------------------------------------------------------------------------------------------|
| Journal:                      | <i>BMJ Open</i>                                                                                                                                                                                                                                                                                                                                                                                                                                                                                                                                                                                                                                                                                |
| Manuscript ID                 | bmjopen-2023-081304                                                                                                                                                                                                                                                                                                                                                                                                                                                                                                                                                                                                                                                                            |
| Article Type:                 | Original research                                                                                                                                                                                                                                                                                                                                                                                                                                                                                                                                                                                                                                                                              |
| Date Submitted by the Author: | 24-Oct-2023                                                                                                                                                                                                                                                                                                                                                                                                                                                                                                                                                                                                                                                                                    |
| Complete List of Authors:     | Mahmoud, Aseel; University of Exeter, Faculty of Health and Life Sciences<br>Goodwin, Victoria; University of Exeter, PenCLAHRC<br>Morley, Naomi; University of Exeter, Faculty of Health and Life Sciences<br>Whitney, Julie ; King's College London, Life Sciences and Medicine<br>Lamb, Sarah; University of Exeter, Faculty of Health and Life Sciences<br>Lyndon, Helen; Cornwall Partnership NHS Foundation Trust, Adult Community Services Specialist Services Directorate; University of Plymouth, Southwest Clinical School<br>Creanor, Siobhan; University of Exeter, Faculty of Health and Life Sciences<br>Frost, Julia; University of Exeter, Faculty of Health and Life Sciences |
| Keywords:                     | Aging, QUALITATIVE RESEARCH, GERIATRIC MEDICINE                                                                                                                                                                                                                                                                                                                                                                                                                                                                                                                                                                                                                                                |
|                               |                                                                                                                                                                                                                                                                                                                                                                                                                                                                                                                                                                                                                                                                                                |

SCHOLARONE™  
Manuscripts

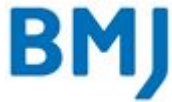

I, the Submitting Author has the right to grant and does grant on behalf of all authors of the Work (as defined in the below author licence), an exclusive licence and/or a non-exclusive licence for contributions from authors who are: i) UK Crown employees; ii) where BMJ has agreed a CC-BY licence shall apply, and/or iii) in accordance with the terms applicable for US Federal Government officers or employees acting as part of their official duties; on a worldwide, perpetual, irrevocable, royalty-free basis to BMJ Publishing Group Ltd ("BMJ") its licensees and where the relevant Journal is co-owned by BMJ to the co-owners of the Journal, to publish the Work in this journal and any other BMJ products and to exploit all rights, as set out in our [licence](#).

The Submitting Author accepts and understands that any supply made under these terms is made by BMJ to the Submitting Author unless you are acting as an employee on behalf of your employer or a postgraduate student of an affiliated institution which is paying any applicable article publishing charge ("APC") for Open Access articles. Where the Submitting Author wishes to make the Work available on an Open Access basis (and intends to pay the relevant APC), the terms of reuse of such Open Access shall be governed by a Creative Commons licence – details of these licences and which [Creative Commons](#) licence will apply to this Work are set out in our licence referred to above.

Other than as permitted in any relevant BMJ Author's Self Archiving Policies, I confirm this Work has not been accepted for publication elsewhere, is not being considered for publication elsewhere and does not duplicate material already published. I confirm all authors consent to publication of this Work and authorise the granting of this licence.

BMJ version 1 23/10/2023

DREAM PAPER Version 8 26/09/2023

1  
2  
3  
4 **1 How can we improve Comprehensive Geriatric Assessment for older people living**  
5  
6 **2 with frailty in primary care and community settings? A Qualitative Study**  
7  
8  
9

10 Aseel Mahmoud<sup>1</sup>, \*Victoria A Goodwin<sup>1</sup>, Naomi Morley<sup>1</sup>, Julie Whitney<sup>2</sup>, Sarah E Lamb<sup>1</sup>, Helen  
11 Lyndon<sup>3,4</sup>, Siobhan Creanor<sup>1</sup>, Julia Frost<sup>1</sup> on behalf of the DREAM Study Team

12  
13  
14  
15 <sup>1</sup>Faculty of Health and Life Sciences, University of Exeter

16  
17  
18 <sup>2</sup>Life Sciences and Medicine, King's College London

19  
20  
21 <sup>3</sup>Cornwall Foundation NHS Trust, Adult Community Services Specialist Services Directorate

22  
23  
24 <sup>4</sup>University of Plymouth, Southwest Clinical School

25  
26  
27 \*Address correspondence to: Professor Victoria Goodwin, Faculty of Health and Life Sciences,  
28 University of Exeter, UK Email: [v.goodwin@exeter.ac.uk](mailto:v.goodwin@exeter.ac.uk)  
29

30  
31 **Abstract**  
32

33  
34  
35 **Objective**  
36

37 With advancing age comes the increasing prevalence of frailty and increased risk of adverse  
38 outcomes (e.g. hospitalisation). Comprehensive Geriatric Assessment (CGA) is a multi-dimensional  
39 holistic assessment that includes physical, cognition and psychosocial components. International  
40 evidence shows positive outcomes from CGA use in the community. This study aimed to explore how  
41 to improve the current CGA, and the factors needed to implement it in the community in England.  
42  
43  
44  
45  
46  
47  
48

49 **Design**  
50

51 A qualitative interview study with older people over 75 years and health care professionals. Data  
52 were analysed using an abductive analysis approach.  
53

54  
55  
56 **Setting**  
57

58 England, United Kingdom  
59  
60

BMJ version 1 23/10/2023

DREAM PAPER Version 8 26/09/2023

## 23 **Results**

24 Twenty-seven people were interviewed, constituting 14 older people and 13 healthcare  
25 professionals (HCPs). We identified limitations in the current CGA: a lack of information sharing  
26 between different healthcare professionals who deliver CGA; poor communication between older  
27 people and their HCPs; and a lack of follow-up as part of CGA. When we discussed the potential for  
28 CGA to utilise technology, HCPs and older people varied in their readiness to engage with it.

## 29 **Conclusions**

30 Viable solutions to address gaps in the current delivery of CGA include the provision of training and  
31 support to use digital technology and a designated comprehensive care coordinator. The next stage  
32 of this research will use these findings, existing evidence and stakeholder engagement, to develop  
33 and refine a model of community based CGA that can be assessed for feasibility and acceptability.

## 34 **Keywords**

35 Ageing, comprehensive geriatric assessment, digital technology, frailty, qualitative.

## 36 **Strengths and Limitations**

- 37 • Use of qualitative interviews enabled rich data on exploration and synthesis of older people  
38 and healthcare professionals.
- 39 • Our theoretically informed qualitative research and stakeholder insights identified both  
40 challenges to the current delivery of CGA as well as opportunities for the improvement of  
41 CGA for older people with frailty.
- 42 • Our study is deliberately exploratory; thus the findings may not be transferable to other  
43 older and healthcare professionals. However, we recruited older people with frailty and  
44 HCPs with a wide variety of views and experiences.

BMJ version 1 23/10/2023

DREAM PAPER Version 8 26/09/2023

## 45 Introduction

46 Between 2020 and 2050 the number of people aged over 80 will triple to reach 426 million (1). With  
47 ageing, people are more susceptible to develop multiple, complex conditions that reduce their  
48 independence and quality of life (1-4). This is due to underlying factors, such as falls, frailty, and  
49 delirium (1, 3).

50 Frailty is a clinical syndrome where multiple body systems deteriorate leading to increased  
51 vulnerability (3, 5). Frailty increases the risk of falls, disability, hospitalisation, mortality, and contact  
52 with healthcare services (5, 6). Prevention and reversal of frailty can enable people to stay well and  
53 live independently for longer (3). Frailty affects half of the UK population aged over 85 and costs the  
54 NHS £5.8 billion per year (6). Older people with frailty need robust interventions that respond to the  
55 complexity of their condition (3, 7). Comprehensive Geriatric Assessment (CGA) delivered in acute,  
56 primary and community settings aims to prevent deterioration and complications associated with  
57 frailty (3, 8). CGA is a multi-dimensional diagnostic and therapeutic intervention that includes a  
58 comprehensive assessment of physical, cognitive and psychosocial components with the  
59 development of a holistic management plan in partnership with the older person with frailty (7).  
60 Evidence for the effectiveness of CGA for older people with frailty in community from recent  
61 systematic reviews is mixed (7, 9, 10). Ho et al reported benefits in terms of the likelihood of living at  
62 home, reduced mortality, improved cognition, and activities of daily living, but with uncertain  
63 benefits on quality of life (10). Whereas Briggs and colleagues found no difference in mortality,  
64 activities of daily living, quality of life and care home admissions (7).

65 A key priority of the National Health Service (NHS) in the UK is to support older people with frailty in  
66 managing their long-term conditions (3, 11). Regardless of the complexity and diversity of the needs  
67 of older people with frailty, some are facing inequity in access to interventions which, if accessed,  
68 may help to maintain their independence (3). Thus, there is a need to ensure that CGA best meets  
69 the needs of all older people living with frailty, without compromising safety and efficacy.

BMJ version 1 23/10/2023

DREAM PAPER Version 8 26/09/2023

1  
2  
3 70 Recent NHS initiatives to strengthen the efficiency of outpatient services using non-face-to-face  
4  
5 71 approaches require consideration. For example, there is growing interest in the use of wearable  
6  
7 72 devices to monitor patients (11). The NHS Long Term Plan and Digital Transformation Plan  
8  
9 73 recommend the use of digital equipment in the assessment and monitoring of older people with  
10  
11 74 frailty; with the option of using wearable devices to ensure services are inclusive and available to all  
12  
13  
14 75 (11, 12).

16  
17 76 Improving the effectiveness and efficiency of CGA (10) requires exploration of how individual  
18  
19 77 components may work and how the overall intervention can be enhanced. The Digital and Remote  
20  
21 78 Enhancement for the Assessment and Management of Older People with Frailty (DREAM) project  
22  
23 79 aimed to develop a model for CGA that utilised digital technology. This qualitative paper explores  
24  
25 80 the factors for enhancing CGA in community settings.

## 29 81 **Methods**

### 32 82 **Design**

33  
34  
35 83 A qualitative interview study with older people and health care professionals. AM collected and  
36  
37 84 analysed the data in collaboration with VG and JF. AM, VG and JF are experienced qualitative  
38  
39 85 researchers from different professionals backgrounds (physiotherapist, pharmacist and nurse).  
40  
41 86 Ethical approval was issued by the University of Exeter, College of Medicine and Health Research  
42  
43 87 Ethics Committee (Ref 509407). The study has been reported according to the Consolidated Criteria  
44  
45 88 for Reporting Qualitative Study (COREQ) guidelines (13).  
46  
47  
48

49 89

### 52 90 **Stakeholder engagement**

53  
54 91 Patient Public Involvement and Engagement (PPIE) representatives and Health and Care Professional  
55  
56 92 (HCP) stakeholders contributed to the development, design and conduct of this research. They  
57  
58  
59  
60

BMJ version 1 23/10/2023

DREAM PAPER Version 8 26/09/2023

93 contributed to developing and piloting topic guides for the interviews and provided analytical insight  
94 into preliminary findings.

### 95 **Sampling and Recruitment**

96 We employed a maximum variation sampling strategy (14) to capture diversity in gender, ethnicity,  
97 living circumstances, socioeconomic factors, geography, frailty, sensory (e.g. visual or hearing  
98 problems), and memory problems of older people with frailty. For healthcare professionals, we also  
99 used a maximum variation sampling strategy (14), to ensure representation of professional  
100 background, geographical location, and gender.

101 We invited 132 community-dwelling older people, who had participated in either the Community  
102 Ageing Research (CARE) 75+ (15) or the Oxford Pain Activity and Lifestyle (OPAL) (16) cohort studies,  
103 to be interviewed. Both CARE 75+ and OPAL cohorts provide older people who were representative  
104 and diverse geographical, ethnic backgrounds. We invited health and social care professionals  
105 working in non-hospital settings in the UK working with older people living with frailty via social  
106 media (Twitter and Facebook) and via professional networks. AM had no previous contact with any  
107 of the participants. The interviews were conducted face-to-face, via telephone or video call,  
108 depending on the participants' preference (14).

### 109 **Data collection**

110 We developed semi-structured topic guides (14, 17) for older people (Additional file 1) and HCPs  
111 (Additional file 2) based on a review of literature, discussions with our older people and family  
112 members, and HCP stakeholders. Topic domains were aligned to the Non-adoption, Abandonment,  
113 Scale up, Spread and Sustainability (NASSS) framework to ensure collection of rich data (18) to  
114 explicitly focus our analysis on how best to improve CGA (18). AM piloted the topic guide with  
115 stakeholders and refined one question (concerning outcomes to be measured) for clarity. The topic  
116 guide enabled consistency in the data collection, with the interviews flexible enough to allow the  
117 participants to explain what was important to them (19). The audio-recorded interviews were



BMJ version 1 23/10/2023

DREAM PAPER Version 8 26/09/2023

118 transcribed by a GDPR compliant transcriber and checked for accuracy by AM. Fieldnotes captured  
119 the context of the interview.

## 120 **Data analysis**

121 We undertook abductive analysis (20), and used NVivo (Release 1.7) (21) to manage the data. This  
122 involved an iterative approach to analysis, to facilitate understanding (19, 22). We coded the  
123 interviews in cycles, with deductive codes from the literature and inductive codes generated by AM,  
124 identifying similar ideas or concepts that could be categorised into a code (19, 23). This enabled  
125 balance between data relating to pre-existing concepts and data based on the perspectives of the  
126 participants (20, 24). We (AM, VG and JF) then developed a conceptual map of the different  
127 participants' perspectives (17) before we further categorised the codes using the NASSS framework,  
128 and the Theoretical Framework of Acceptability (18, 25), which allowed us to explain complexity  
129 within the domains of an intended intervention: CGA that utilises technology. We used the  
130 conceptual map to create a hypothetical case (vignette) of an older person who participated in a  
131 CGA that used technology (26). We used the vignette in the final three interviews with HCPs, to  
132 extend our understanding of the potential afforded by technology.

## 133 **Results**

134 Interviews took place between May and December 2022.

### 135 **Older people**

136 Fourteen older people consented to participate and were interviewed. Respondents were aged  
137 between 75 and 90 years old, were evenly split between males and females, and included  
138 participants with hearing and/or visual impairment, mobility impairments, and with one or more  
139 long term condition. One participant asked to be interviewed in the presence of their carer (a  
140 spouse). The interviews lasted between 16 and 92 minutes . (Table 1).

141 *Table 1 Demographic characteristics of older people with frailty*

BMJ version 1 23/10/2023

DREAM PAPER Version 8 26/09/2023

| Participant Pseudonym | Gender | Age | Current residence in England | Living circumstances | Mode of interview   |
|-----------------------|--------|-----|------------------------------|----------------------|---------------------|
| Robert                | Male   | 84  | North East                   | Live alone           | Telephone interview |
| James                 | Male   | 83  | South West                   | Live alone           | In-person interview |
| Richard               | Male   | 82  | South West                   | Live with spouse     | Online audio call   |
| William               | Male   | 90  | North East                   | Live with spouse     | Online video call   |
| Barbara               | Female | 82  | North East                   | Live with spouse     | Telephone interview |
| Gary                  | Male   | 76  | North East                   | Live with spouse     | Telephone interview |
| Karen                 | Female | 79  | South East                   | Live alone           | Online video call   |
| Steven                | Male   | 75  | South East                   | Live with spouse     | Telephone interview |
| Shirley               | Female | 79  | Midlands                     | Live alone           | Telephone interview |
| Frances               | Female | 89  | South East                   | Live alone           | Telephone interview |
| Carol                 | Female | 82  | North West                   | Live alone           | Telephone interview |
| Donna                 | Female | 85  | South East                   | Live alone           | Telephone interview |
| Frank                 | Male   | 80  | Midlands                     | Live with spouse     | Telephone interview |
| Lois                  | Female | 86  | South West                   | Live with spouse     | Telephone interview |

142

### 143 **Healthcare professionals**

144 The thirteen HCPs came from different professional backgrounds, and from different geographical  
 145 areas of England. All of the participants were working, or had worked, with older people with frailty,

BMJ version 1 23/10/2023

DREAM PAPER Version 8 26/09/2023

146 for a duration of two to 30 years (Table 2). The interview duration ranged between 33 and 160  
 147 minutes .

148 *Table 2 Demographic characteristics for HCPs who participated in the study*

| Participant number | Profession                     | Years of providing care to older people | Location in England | Gender | Mode of interview |
|--------------------|--------------------------------|-----------------------------------------|---------------------|--------|-------------------|
| HP1                | Frailty assistant practitioner | 20                                      | South West          | Female | Online            |
| HP2                | Nurse                          | 15                                      | South West          | Male   | Online            |
| HP3                | GP                             | Retired                                 | North East          | Female | Online            |
| HP4                | Physiotherapist                | 19                                      | South West          | Female | Online            |
| HP5                | GP                             | 16                                      | South West          | Female | Online            |
| HP6                | Physiotherapist                | 30                                      | South West          | Female | Online            |
| HP7                | Nurse                          | 15                                      | South West          | Female | Online            |
| HP8                | Nurse                          | 2                                       | South East          | Female | Online            |
| HP9                | Occupational therapist         | 10                                      | South East          | Female | Online            |
| HP10               | Consultant Geriatrician        | 23                                      | North West          | Male   | Online            |
| HP11               | Consultant Geriatrician        | 19                                      | Midlands            | Female | Online            |
| HP12               | Physiotherapist                | 4                                       | Midlands            | Female | Online            |

BMJ version 1 23/10/2023

DREAM PAPER Version 8 26/09/2023

|      |            |   |            |        |        |
|------|------------|---|------------|--------|--------|
| HP13 | Pharmacist | 3 | North West | Female | Online |
|------|------------|---|------------|--------|--------|

149

(18, 25) Here we present the four domains that were most important for both the patient and professional participants: frailty (the condition), intended adopters (both professional and lay), organisational factors (such as workforce challenges), and acceptability (of aspects of technology and assessment).

### 154 **Frailty**

155 Amongst HCPs, there was an appreciation of the complexity of frailty as a condition. Regardless of  
156 whether they have an acute condition or not, all older people with frailty have complex needs due to  
157 having multiple long-term conditions, impairments and/or socioeconomic factors:

---

158 *“Most of them are aged 80 almost all of them are frail and so they have multiple chronic*  
159 *conditions, they have got polypharmacy they tend to need some help with one or more*  
160 *activities of daily living”.* (HP13, Pharmacist)

---

161 HCPs from different professions tend to provide a comprehensive assessment that involves physical,  
162 psychological and social needs for older people with acute and non-acute conditions. However,  
163 there is a need to provide older frail people with assessment prior to a crisis developing:

---

164 *“All the domains yeah, the psychological, physical all those you know functional,*  
165 *environmental you know do you live in a house, a flat, bungalow, do you sleep upstairs, any*  
166 *falls you know any equipment in the toilet, that kind of thing and social you know do you*  
167 *get out.”* (HP12, Physiotherapist)

168 *“So, if you’re trying to keep somebody weller for longer, then any of those proactive*  
169 *interventions rather than waiting until they get to crisis point.”* (HP9, Occupational  
170 *therapist)*

---

171 We interviewed older people with frailty who were socioeconomically disadvantaged and/or  
172 experienced sensory or physical impairment that can exacerbate the complexity of their condition.

BMJ version 1 23/10/2023

DREAM PAPER Version 8 26/09/2023

1  
2  
3 173 For example, Carol had financial challenges, restricted mobility, visual impairment, multiple long-  
4  
5 174 term conditions, and a high risk of falling. Carol had limited choices in access to care, because of her  
6  
7 175 restricted ability to travel to appointments, lack of a support network, and no access to technology:  
8  
9  
10

---

11  
12 176 *“I’ve been a single person all my life and I get the basic state pension. So, I’ve never ever*  
13 *been able to afford the technology that people use every day to day in these days and*  
14 *that’s the reason I don’t have it.” (Carol, 82 years old)*  
15  
16

---

17  
18 179 In contrast, Karen lived alone, but has regular communication with family and friends. During her  
19  
20 180 health and care journey, Karen was able to enact her own health decisions and avoided long NHS  
21  
22 181 waiting time for tests and referrals:  
23  
24  
25

---

26  
27 182 *“I only saw the consultant yesterday, so the next steps haven’t been put in place yet.*  
28 *Unfortunately, I have had to pay privately for it and the NHS seems to be in such a mess*  
29 *and the doctor did want to send me off for tests but she couldn’t justify so, more or less*  
30 *saying well you know it is as it is we can’t do anything more for you because we haven’t got*  
31 *proof that this test or that test is something we can do, something we can justify. [...] I’ll*  
32 *have to pay for that privately otherwise I will just be waiting too long. You know I am*  
33 *getting on I don’t want the last two or three years probably of my life to be sitting around*  
34 *at home feeling sorry for myself.” (Karen, 79 years old)*  
35  
36

---

### 37 38 190 **Intended adopters**

39  
40 191 Some HCPs indicated that an HCPs occupational background may inform the scope of assessment  
41  
42 192 during the CGA, and the quality of the CGA that they offer. A nurse who led a frailty team showed  
43  
44 193 appreciation of the range of HCP backgrounds in their team, which enabled them to involve the  
45  
46 194 most suitable HCP (e.g. in terms of their skill set), to meet the unique needs of the older person:  
47  
48  
49  
50

---

51  
52 195 *“obviously if it was things like their ability to perform their physical activity to daily living*  
53 *that maybe something that I would involve one of, I’ve got a colleague who is Band 4*  
54 *assistant practitioner whose got a therapy background she’s very good at looking at the*  
55 *nuts and bolts of how people physically manage [...] I will also do joint visits with OTs and*  
56 *physios if we’re feeling that we need to, that there’s a, that the referral makes it sound like*  
57 *this is very much that mixed picture of it’s not just a medical requirement or a strict nursing*  
58  
59  
60

BMJ version 1 23/10/2023

DREAM PAPER Version 8 26/09/2023

201 *requirement that there's an overlap with where my therapy colleagues would come in".*  
 202 *(HP2, Nurse)*

---

203 This contrasted with the view of a consultant geriatrician (HP11) who also led a frailty team. HP11  
 204 indicated that regardless of the different backgrounds of HCPs in their team, there should be no  
 205 differences in the CGA that they provide to older people with frailty. However, HP11 highlighted that  
 206 some professions may have limited ability to understand the complexity of older people's condition.  
 207 This was congruent with the views from older people who thought that their condition could be  
 208 managed better by an HCP with knowledge and experience of older people with frailty:

---

209 *"They all do the same because they've all had their advanced [...], course the advanced*  
 210 *assessment healthcare assessment course. They've all done the same course ok,". (HP11,*  
 211 *Consultant Geriatrician)*

---

212 *"You could have one doctor who is in the practice who specialised in old people you know*  
 213 *just for the aged to sort of he specialised in the aged. [...] where old people could feel they*  
 214 *could go [...] rather than a general practitioner maybe somebody that was for the old and*  
 215 *the frail." (Barbara, 82 years old)*

---

216 In contrast, a GP (HP3) thought that the ability to deliver CGA depends upon the investigative and  
 217 communication skills, and previous experience of staff, and it is not restricted to a particular  
 218 background:

---

219 *"So, I tend to work on a concept that I don't like thinking about professions doing things I*  
 220 *like to think about competencies." (HP3, GP)*

---

221 Some HCPs suggested that HCPs may require training to improve interpersonal skills, in terms of  
 222 communication and attention to detail, to ensure enhancement of CGA. For example, HP12 (a  
 223 Physiotherapist) shared their personal experience of developing their investigational skills when  
 224 providing remote CGA over time. HP7 (a Nurse) shared their experience of supporting new HCPs in  
 225 their team to learn how to pick-up non-verbal cues during home visits, to support identifying care  
 226 needs and provide CGA.

BMJ version 1 23/10/2023

DREAM PAPER Version 8 26/09/2023

227 **Organisation**

228 Interviewing HCPs from different geographical areas of England allowed us to explore organisational  
229 limitations, which would require innovation to increase readiness for new forms of technology-  
230 informed care delivery.

231 Some HCPs made references to fear and resistance to trying new ways of care delivery. For example,  
232 a nurse (HP2) referred to themselves as ‘a dinosaur’ when it comes to trying new technologies.

233 Similarly, a frailty assistant practitioner (HP1) also indicated that practitioners may need support  
234 from colleagues, while a consultant geriatrician (HP11) shared the challenges they had when using  
235 technology and the time needed for training to use new technology:

---

236 *“There’s also the training aspect of it training takes a long time you go in and sit down and*  
237 *have training whatever new technology comes you have to find time to go for training and*  
238 *you actually don’t get to understand its use until you start using it and the problems that*  
239 *you get when you start using it”. (HP11, Consultant Geriatrician)*

---

240 Almost all HCPs discussed the negative impact of using different clinical databases in various settings  
241 on their ability to share and/or access patients’ records. HCPs discussed the importance of having a  
242 well-established information sharing process between HCPs in different settings in enhancement of  
243 CGA. HCPs shared their experiences of meeting the challenges in information sharing. For example,  
244 sharing data in regular Multi-Disciplinary Team (MDT) meetings, provides access to the GP medical  
245 records for HCPs who work in the community, which enables them to effectively support the older  
246 people with whom they work. Some organisations have a sharing document that all HCPs involved in  
247 CGA can use to input and share data, which staff found beneficial in terms of the availability of  
248 information and efficiency in obtaining key information when needed:

---

249 *“I’ve not seen they’ve had a CGA, their clinical frailty scale is this, blah, blah, blah never*  
250 *seen it never ever. Never ever, ever seen it. So, information is not coming it is not flowing”.*  
251 *(HP12, Physiotherapist)*

---

BMJ version 1 23/10/2023

DREAM PAPER Version 8 26/09/2023

252 *“I just from previous experience I knew these sorts of things I needed to have so I made*  
 253 *sure that I discussed it with the CGG and got them to put this in place because I didn't want*  
 254 *to be spending exactly like the nurse, two hours, trying to get information when in five*  
 255 *minutes I can have that information.” (HP10, Consultant Geriatrician)*

256 *“So, for me to be able to know what medicines somebody is on, I have to have access to*  
 257 *that or I've got ask somebody who has access to check for me ok”. (HP11, Consultant*  
 258 *Geriatrician)*

259 Lack of staff capacity was perceived as a limitation for delivering CGA by all HCPs, which may inhibit  
 260 delivery of timely support which an older people may require. Some older people recognised the  
 261 limited staff availability and the increasing demands on the GP practices that inhibit continuity in  
 262 care. For them, lack of continuity decreases their engagement with their care:

263 *“More of us, more availability [...] I mean we are running its sort of like a virtual ward model*  
 264 *but it's going to be, we have less staff on at a weekend. So, our capacity to take new*  
 265 *referrals on a Friday and over the weekend is a lot less.” (HP9, Occupational therapist)*

266 *““When you see the doctor, you know you barely it's a locum that I see I don't see my own*  
 267 *doctor.”.” (Shirley, 79 years old)*

268 In contrast, other older people with frailty understood the current workforce challenges in the NHS  
 269 and suggested that improved communication between HCPs and sharing information may mitigate  
 270 the current lack of continuity:

271 *“GPs talk to each other and that you know if you go in and you see somebody who is not*  
 272 *your designated GP you know that fine well that the notes are there [...]. So, you feel*  
 273 *perfectly happy that you know whoever you are seeing, knows what they are talking*  
 274 *about.” (Lois, 86 years old)*

275 However, we identified that when an older person can identify a key contact person to support  
 276 them, this can mitigate a lack of continuity in their care, because they key person can co-ordinate  
 277 their care and ensure the continuous flow of communication:



BMJ version 1 23/10/2023

DREAM PAPER Version 8 26/09/2023

278 *“So, I sort of stayed involved in this case as a coordinating factor because you know it*  
279 *happens when too many people are involved things the outcome might not be good or the*  
280 *people can get lost in translation and so I managed to speak to the mental health team and*  
281 *everything and draw all the people that the GP had referred to, to a point where I said now,*  
282 *you need to take this forward.” (HP12, Physiotherapist)*

### 283 **Acceptability**

284 We identified elements that might influence acceptability by older people with frailty, that should be  
285 taken into consideration when enhancing CGA.

286 Although HCPs perceived that older people were satisfied with CGA and the care provided to them,  
287 some older people indicated that they could not freely communicate with HCPs and express their  
288 needs, because of perceived short appointments with their GP. Furthermore, older people lacked  
289 trust in their HCPs, or the clinical decisions made about their treatment plan:

290 *“I would say the consistent feedback is normally that we that they’re greatly relieved that*  
291 *we’ve given the time ‘cos we don’t time specify our visits” (HP2, Nurse)*

292 *“No, it’s so quick and it’s so, I mean in person, well I wouldn’t say personal you know when*  
293 *you speak to a doctor like I did with my old doctor if he, it was just a different attitude*  
294 *towards you, it’s like a conveyor belt, you come in, you go out, you come in and you go out*  
295 *so, you know you just feel it’s not the same what it was before.” (Shirley, 79 years old)*

296 Moreover, HCPs acknowledged the variation in older people readiness to engage with new ways of  
297 care delivery:

298 *“There is a high risk of inequalities because anytime you are going introduce something*  
299 *different new, there are going to be people who can use it very easily and there are going*  
300 *to be those who can’t for whatever reasons”. (HP13, Pharmacist)*

301 This aligned with the findings from interviews with the older people themselves. For example, Karen  
302 showed readiness to engage with new ways of receiving technology-informed care because she had

BMJ version 1 23/10/2023

DREAM PAPER Version 8 26/09/2023

303 previous experience of using technology in her healthcare, and in communication with family  
304 members. In contrast, Shirley rejected engagement with new forms of remote appointments:

---

305 *“They did ask me once yes, but I said, well, I don’t know how to do it, let’s put it that way a*  
306 *video appointment I mean I don’t [...] I have a mobile phone so, you know I just don’t know*  
307 *how to do it. So, the other solution was that they speak to me over the phone”. (Shirley, 79*  
308 *years old)*

---

309 Lack of physical access to technology (e.g. a device or internet connection) can inhibit an older  
310 person's opportunity to learn how to use technology, which may subsequently limit their readiness  
311 to engage with new forms of technology informed care. Therefore, those with frailty may require  
312 additional support to engage with CGA that utilises technology. For example, older people with  
313 sensory impairment may require specialist adaptation to their device, or support from a carer to  
314 engage; whereas older people who are already digitally literate may only need educational input on  
315 how to use a new technology.

316 HCPs recognised the variation in the needs and preferences of older people with frailty and  
317 discussed how they tailor CGA to the person’s needs:

---

318 *“I would say we’re able to be very person-centred we’re not looking at things from a*  
319 *clinician’s perspective only we will explore things from the patient’s perspective in terms of*  
320 *what they think is their problems.” (HP4, Physiotherapist)*

---

321 Some HCPs thought that the presence of a carer, a family member or support network may increase  
322 a frail older person's acceptance of CGA that utilises technology. However, HCPs acknowledged the  
323 higher demands on the carer which may reduce the support they can provide, to help the older adult  
324 engage with technology. A GP (HP3) shared examples of caregivers who inadvertently disempower  
325 the older person, in terms of decision-making about their healthcare choices. Older people may  
326 therefore require support from a wider network, and not only their carer:

BMJ version 1 23/10/2023

DREAM PAPER Version 8 26/09/2023

---

327 *“Some of them have families who help them but they still like you know eye contact,*  
328 *physical contact and the written word, you know paper, hard copy of anything. So, I am*  
329 *afraid that’s something that they’ll eventually all pop off but and thankfully the younger*  
330 *ones are you know quite capable of using all these devices.” (Barbara, 82 years old)*

---

331

332 HCPs may not be able to provide the required follow-up after an assessment, important for tracking  
333 the referrals to other services if needed and the management plan provided to the patient. Similarly,  
334 older people explained the challenges that they were facing in following-up the HCPs; for example,  
335 to find out the result of a test, or to book an appointment:

---

336 *“I would like to think we’re good at going out and identifying the problem we’re good at*  
337 *negotiating a management plan with someone it’s then how do you monitor the effect of*  
338 *that management plan”. (HP2, Nurse)*

339 *“I had to phone my practice after I’d been to see the 111 doctor and she said get in touch*  
340 *with your practice and I got this sort of non-committal reply oh, well you’d better start your*  
341 *antibiotics and I was quite disappointed that they didn’t get in touch with me because*  
342 *they’d given me that advice without having seen a report and I thought well I would have*  
343 *expected something to come back but like I said, I was really not well enough to do*  
344 *anything about it”. (Donna, 85 years old)*

---

## 345 Discussion

346 In this study, we identified key challenges to the enhancement of CGA in the community, including:  
347 information sharing between different HCPs who are delivering the CGA; communication between  
348 older people and their HCPs; and follow-up appointments after conducting the CGA. From the  
349 current challenges that were explained by participants, and suggestions which they made to address  
350 them, we identified factors to enhance CGA in the community.

351 Both HCPs and older people considered that the delivery of CGA should not be limited to those from  
352 specific professions but should be based upon a HCPs competency and knowledge of the complexity  
353 of need for older people with frailty. This finding aligns with the Ageing Well Network of Enhanced

BMJ version 1 23/10/2023

DREAM PAPER Version 8 26/09/2023

1  
2  
3 354 Care for older People (EnCOP) competency framework (27); an aim of which is to enhance staff  
4  
5 355 competency in working anywhere in the care system (27). The Health Education England and NHS  
6  
7 356 England commissioned the Frailty Core Capabilities Framework in 2018 to identify skills and  
8  
9  
10 357 behaviours required to deliver high quality of care to older people with frailty (28). However, there is  
11  
12 358 limited use of the framework in commissioning education or training, reflected in the results of  
13  
14 359 evaluation surveys that were conducted in 2018 and 2019 (29). We suggest that upskilling staff and  
15  
16 360 providing them with appropriate training to improve their communication and investigation skills  
17  
18 361 may be a viable solution to mitigate the negative impact of workforce shortages on the effectiveness  
19  
20  
21 362 of CGA.

22  
23  
24 363 From conducting interviews and workshops with stakeholders, we identified the need for assigning a  
25  
26 364 member of staff or MDT team to a co-ordinating role, which we designated as “Comprehensive Care  
27  
28 365 Coordinator”. This person could coordinate the delivery of CGA by facilitating information sharing  
29  
30 366 between different HCPs, communicating with older people with frailty on a regular basis, and  
31  
32 367 ensuring that the management plan including referrals is acted upon. Designating a care coordinator  
33  
34 368 may improve continuity of care with one point of contact and provide reassurance through a  
35  
36 369 therapeutic, long-term relationship. This may provide reassurance to the older person and ensure  
37  
38 370 effective follow-up of any management plan. Care coordinator roles in the community, including  
39  
40 371 case managers, may reduce emergencies. However, evidence shows variation in the role in different  
41  
42 372 studies in terms of duration and frequency of home visits and HCPs who coordinated the care (10,  
43  
44 373 30, 31). Further research needs to identify who could best coordinate care in older people and what  
45  
46 374 the best approach may be.

47  
48  
49  
50  
51 375 Moreover, HCPs agreed that utilising technology in the delivery of CGA may enable HCPs to provide  
52  
53 376 support for older people without compromising their follow-up. The NHS plan highlighted the need  
54  
55 377 for enhancing the use of technology in healthcare, to change how care is being provided to patients;  
56  
57 378 and to create joined up computer systems that give staff sufficient access to data, to provide  
58  
59  
60

BMJ version 1 23/10/2023

DREAM PAPER Version 8 26/09/2023

1  
2  
3 379 improved care for patients (11). However, there is a need for digital upskilling of staff to support  
4  
5 380 their effective use of technology in healthcare (32).  
6  
7  
8 381 Different IT-systems and a lack of information governance arrangements across different settings  
9  
10 382 currently inhibits information sharing and creates tension between HCPs in different settings. HCPs  
11  
12 383 told us that the lack of connection between different systems must be addressed, if they are to  
13  
14 384 deliver an effective CGA. Similarly, older people mentioned how lack of access to information  
15  
16 385 magnified unequal access to effective CGA, and support and care for older people with frailty. In  
17  
18 386 February 2023, NHS Digital became responsible for digital technology, data and health and care  
19  
20 387 delivery. This has the potential to address some of the challenges in information sharing (12).  
21  
22 388 Existing research has identified the need for convenient platforms and improved digital records for  
23  
24 389 integrated care services for older people (including CGA) that maintain privacy and security when  
25  
26 390 sharing patient data between MDTs (32, 33). Such integrated platforms may enhance  
27  
28 391 communication and coordination of care (32, 33). However, resolving existing operational  
29  
30 392 complexities is likely to require additional funding and the creation of interoperable IT-systems (11,  
31  
32 393 12, 32, 34).  
33  
34  
35  
36  
37  
38 394 We found that socioeconomic factors, including living circumstances, income, and social network  
39  
40 395 impacted older peoples' treatment choices; in terms of whether they visited a clinical specialist and  
41  
42 396 waiting times for NHS appointments. This implies that when developing the CGA that utilises  
43  
44 397 technology we need to consider how to mitigate socioeconomic factors that inhibit access and  
45  
46 398 capacity to obtain the benefits of using digital equipment in the assessment and follow-up. Existing  
47  
48 399 research suggests that digital interventions are less effective in populations with socioeconomic  
49  
50 400 disadvantage compared with those with higher socioeconomic status (35). Although the COVID 19  
51  
52 401 pandemic accelerated the shift to online resources and services, and changed patient perceptions  
53  
54 402 and willingness to use technology, it increased digital inequalities (36, 37). Increasing physical access  
55  
56 403 to connected devices and the internet may not be enough to reduce inequalities in access to CGA  
57  
58  
59  
60

BMJ version 1 23/10/2023

DREAM PAPER Version 8 26/09/2023

1  
2  
3 404 that utilises technology (35, 36, 38). Therefore, training and support would be needed to ensure  
4  
5 405 older people could be digitally enabled; however, this may not be appropriate for everyone, and  
6  
7 406 support would need to be individualised (39).  
8  
9

10 407 Using technology for monitoring and supporting older people with frailty is an NHS priority, and over  
11  
12 408 time there may be more opportunities for older people with frailty to access and use technology  
13  
14 409 (11). Research now needs to assess if these changes positively affect older people with frailty,  
15  
16 410 support engagement with CGA that utilises technology, and whether they diminish inequalities in  
17  
18 411 access to technology informed care.  
19  
20  
21

22 412 Qualitative interviews enabled exploration and synthesis of older people and HCPs perspectives.  
23  
24 413 Although we recruited older people with frailty and HCPs with a wide variety of views and  
25  
26 414 experiences, our findings may not be transferable to older people and HCPs who have different  
27  
28 415 experiences or perspectives (e.g. we were unable to recruit any social workers despite employing  
29  
30 416 several strategies) (17, 19). However, our theoretically informed qualitative research and  
31  
32 417 stakeholder insights identified both challenges to the current delivery of CGA as well as  
33  
34 418 opportunities for the improvement of CGA for older people with frailty.  
35  
36  
37  
38

## 39 **Conclusions**

40  
41  
42 420 We identified four factors to enable implementation of CGA in community: enhancing staff  
43  
44 421 competency in working with older people with frailty, creating interoperable IT-systems, assigning a  
45  
46 422 care coordinator for older people with frailty, and mitigation of the impact of inequalities in access  
47  
48 423 to digital care. Introducing technology and a designated comprehensive care coordinator may be  
49  
50 424 vital to addressing gaps in the current provision of CGA. These solutions may also positively affect  
51  
52 425 the acceptability of CGA in older people with frailty. The next stage of this research will further  
53  
54 426 develop, refine and test a model of improved CGA in community setting.  
55  
56  
57  
58  
59  
60

BMJ version 1 23/10/2023

DREAM PAPER Version 8 26/09/2023

## 427 Acknowledgements:

428 We would like to thank our public and professional advisory groups who have provided insight and  
429 contributed at every stage of the research. We would also like to thank the wider DREAM Study  
430 team: Andrew Clegg, Tom Crocker, Silvia Del Din, Fiona Hamilton, Claire Hulme, and Tim Sanders.

## 431 References

- 432 1. World Health Organisation. Ageing and health [Internet]: WHO; [Available from:  
433 <https://www.who.int/news-room/fact-sheets/detail/ageing-and-health>.
- 434 2. The King's Fund. Long-term conditions and multi-morbidity [Internet]:  
435 [www.kingsfund.org.uk](http://www.kingsfund.org.uk); [Available from: [https://www.kingsfund.org.uk/projects/time-think-](https://www.kingsfund.org.uk/projects/time-think-differently/trends-disease-and-disability-long-term-conditions-multi-morbidity)  
436 [differently/trends-disease-and-disability-long-term-conditions-multi-morbidity](https://www.kingsfund.org.uk/projects/time-think-differently/trends-disease-and-disability-long-term-conditions-multi-morbidity).
- 437 3. British Geriatric Society. Joining the dots: A blueprint for preventing and managing frailty in  
438 older people. 2023.
- 439 4. Crocker TF, Brown L, Clegg A, Farley K, Franklin M, Simpkins S, et al. Quality of life is  
440 substantially worse for community-dwelling older people living with frailty: systematic review and  
441 meta-analysis. *Qual Life Res.* 2019;28(8):2041-56.
- 442 5. Clegg A, Young J, Iliffe S, Rikkert MO, Rockwood K. Frailty in elderly people. *The Lancet.*  
443 2013;381(9868):752-62.
- 444 6. Han L, Clegg A, Doran T, Fraser L. The impact of frailty on healthcare resource use: a  
445 longitudinal analysis using the Clinical Practice Research Datalink in England. *Age Ageing.*  
446 2019;48(5):665-71.
- 447 7. Briggs R, McDonough A, Ellis G, Bennett K, O'Neill D, Robinson D. Comprehensive Geriatric  
448 Assessment for community-dwelling, high-risk, frail, older people. *Cochrane Database of Systematic*  
449 *Reviews.* 2022(5).
- 450 8. British Geriatric Society. Comprehensive Geriatric Assessment Toolkit for Primary Care  
451 Practitioners [Available from: <https://www.bgs.org.uk/cgatoolkit>.
- 452 9. Sum G, Nicholas SO, Nai ZL, Ding YY, Tan WS. Health outcomes and implementation barriers  
453 and facilitators of comprehensive geriatric assessment in community settings: a systematic  
454 integrative review [PROSPERO registration no.: CRD42021229953]. *BMC Geriatr.* 2022;22(1):379.
- 455 10. Ho L, Malden S, McGill K, Shimonovich M, Frost H, Aujla N, et al. Complex interventions for  
456 improving independent living and quality of life amongst community-dwelling older adults: a  
457 systematic review and meta-analysis. *Age and Ageing.* 2023;52(7):afad132.
- 458 11. NHS. The NHS Long Term Plan. 2019.
- 459 12. NHS England. Digital transformation. 2023.
- 460 13. Booth A, Hannes K, Harden A, Noyes J, Harris J, Tong A. COREQ (Consolidated Criteria for  
461 Reporting Qualitative Studies). *Guidelines for Reporting Health Research: A User's Manual* 2014. p.  
462 214-26.
- 463 14. Hinton L, Ryan S. Interviews. *Qualitative Research in Health Care* 2020. p. 43-55.
- 464 15. Anne H, Lesley B, John Y, Elizabeth T, Rebecca H, Karen S, et al. Community ageing research  
465 75+ study (CARE75+): an experimental ageing and frailty research cohort. *BMJ Open.*  
466 2019;9(3):e026744.
- 467 16. Sanchez Santos MT, Williamson E, Bruce J, Ward L, Mallen CD, Garrett A, et al. Cohort  
468 profile: Oxford Pain, Activity and Lifestyle (OPAL) Study, a prospective cohort study of older adults in  
469 England. *BMJ Open.* 2020;10(9):e037516.

BMJ version 1 23/10/2023

DREAM PAPER Version 8 26/09/2023

- 1  
2  
3 470 17. Creswell JW, Poth CN. Qualitative Inquiry and Research Design: Choosing Among Five  
4 471 Approaches. Thousand Oaks, CA: SAGE Publications Ltd; 2016.
- 5 472 18. Greenhalgh T, Maylor H, Shaw S, Wherton J, Papoutsi C, Betton V, et al. The NASSS-CAT  
6 473 Tools for Understanding, Guiding, Monitoring, and Researching Technology Implementation Projects  
7 474 in Health and Social Care: Protocol for an Evaluation Study in Real-World Settings. JMIR Res Protoc.  
8 475 2020;9(5):e16861.
- 9 476 19. Mays N, Pope C. Quality in qualitative research. Qualitative research in health care.  
10 477 2020;211-33.
- 11 478 20. Timmermans S, Tavory I. Theory Construction in Qualitative Research: From Grounded  
12 479 Theory to Abductive Analysis. Sociological Theory. 2012;30(3):167-86.
- 13 480 21. QSR International Pty Ltd. NVivo. 2022.
- 14 481 22. Creswell JW. Qualitative, quantitative and mixed methods approaches. Sage; 2014.
- 15 482 23. Shepperd S, Craddock-Bamford A, Butler C, Ellis G, Godfrey M, Gray A, et al. Hospital at  
16 483 Home admission avoidance with comprehensive geriatric assessment to maintain living at home for  
17 484 people aged 65 years and over: a RCT. 2022;10:2.
- 18 485 24. Fereday J, Muir-Cochrane E. Demonstrating Rigor Using Thematic Analysis: A Hybrid  
19 486 Approach of Inductive and Deductive Coding and Theme Development. International Journal of  
20 487 Qualitative Methods. 2006;5(1):80-92.
- 21 488 25. Sekhon M, Cartwright M, Francis JJ. Acceptability of healthcare interventions: an overview of  
22 489 reviews and development of a theoretical framework. BMC Health Serv Res. 2017;17(1):88.
- 23 490 26. Jenkins N, Bloor M, Fischer J, Berney L, Neale J. Putting it in context: the use of vignettes in  
24 491 qualitative interviewing. Qualitative Research. 2010;10(2):175-98.
- 25 492 27. Angela Fraser, Lynne Shaw. Enhanced Care of Older People (EnCOP) Competency Framework  
26 493 [Internet]: Frailty icare; [Available from: [https://frailtyicare.org.uk/wp-](https://frailtyicare.org.uk/wp-content/uploads/2022/12/EnCOP-Getting-Started-Core-Slide-Deck.pdf)  
27 494 [content/uploads/2022/12/EnCOP-Getting-Started-Core-Slide-Deck.pdf](https://frailtyicare.org.uk/wp-content/uploads/2022/12/EnCOP-Getting-Started-Core-Slide-Deck.pdf)].
- 28 495 28. Health Education England and NHS England. Frailty; A framework of core capabilities: Skills  
29 496 For Health; 2018 [Available from: [https://www.skillsforhealth.org.uk/wp-](https://www.skillsforhealth.org.uk/wp-content/uploads/2021/01/Frailty-framework.pdf)  
30 497 [content/uploads/2021/01/Frailty-framework.pdf](https://www.skillsforhealth.org.uk/wp-content/uploads/2021/01/Frailty-framework.pdf)].
- 31 498 29. Skills For Health. Frailty Core Capabilities Framework Evaluation: Institute of Ageing and  
32 499 Health; 2019 [Available from:  
33 500 [https://www.skillsforhealth.org.uk/images/services/cstf/SfH%20Frailty%20Framework%20Evaluatio](https://www.skillsforhealth.org.uk/images/services/cstf/SfH%20Frailty%20Framework%20Evaluation%20Report.pdf)  
34 501 [n%20Report.pdf](https://www.skillsforhealth.org.uk/images/services/cstf/SfH%20Frailty%20Framework%20Evaluation%20Report.pdf)].
- 35 502 30. Poupard N, Tang CY, Shields N. Community-based case management does not reduce  
36 503 hospital admissions for older people: a systematic review and meta-analysis. Aust Health Rev.  
37 504 2020;44(1):83-92.
- 38 505 31. Improvement Academy and Connected Health Cities. Effectiveness Matters Recognising and  
39 506 managing frailty in primary care: University of York; 2017 [Available from:  
40 507 <https://www.york.ac.uk/media/crd/effectiveness-matters-may-2017-frailty.pdf>].
- 41 508 32. Masoli JAH, Todd O, Burton JK, Wolff C, Walesby KE, Hewitt J, et al. New horizons in the role  
42 509 of digital data in the healthcare of older people. Age and Ageing. 2023;52(8).
- 43 510 33. Yutong T, Yan Z, Qingyun C, Lixue M, Mengke G, Shanshan W. Information and  
44 511 Communication Technology Based Integrated Care for Older Adults: A Scoping Review. Int J Integr  
45 512 Care. 2023;23(2):2.
- 46 513 34. NHS England. Integrated Care Boards (ICBs) in England. 2022.
- 47 514 35. Western MJ, Armstrong MEG, Islam I, Morgan K, Jones UF, Kelson MJ. The effectiveness of  
48 515 digital interventions for increasing physical activity in individuals of low socioeconomic status: a  
49 516 systematic review and meta-analysis. Int J Behav Nutr Phys Act. 2021;18(1):148.
- 50 517 36. Beaunoyer E, Dupéré S, Guitton MJ. COVID-19 and digital inequalities: Reciprocal impacts  
51 518 and mitigation strategies. Computers in Human Behavior. 2020;111:106424.
- 52  
53  
54  
55  
56  
57  
58  
59  
60



BMJ version 1 23/10/2023

DREAM PAPER Version 8 26/09/2023

37. Husain L, Greenhalgh T, Hughes G, Finlay T, Wherton J. Desperately Seeking Intersectionality in Digital Health Disparity Research: Narrative Review to Inform a Richer Theorization of Multiple Disadvantage. *J Med Internet Res*. 2022;24(12):e42358.

38. Buckingham S, Anil K, Demain S, Gunn H, Jones RB, Kent B, et al. Telerehabilitation for people with physical disabilities and movement impairment: development and evaluation of an online toolkit for practitioners and patients. *Disability and Rehabilitation*. 2022:1-8.

39. Age UK. Digital inclusion and older people – how have things changed in a Covid-19 world? [Internet]2021 [Available from: <https://www.ageuk.org.uk/globalassets/age-uk/documents/reports-and-publications/reports-and-briefings/active-communities/digital-inclusion-in-the-pandemic-final-march-2021.pdf>].

529

## 530 Authors' Contributions

531 VG and JW conceived the ideas for the research with the help of JF and SL. AM collected the data.

532 AM, JF and VG analysed the data. AM led the writing with the help of JF and VG. NM, HL, SL and SC  
533 critically revised the manuscript. All authors have approved the final version of the article.

## 534 Funding

535 This project was funded by the National Institute for Health and Care Research (NIHR) under  
536 its Programme Development Grants (PDG) Programme (Grant Reference Number NIHR203293). The  
537 views expressed are those of the author(s) and not necessarily those of the NIHR or the Department  
538 of Health and Social Care.

## 539 Conflict of interests

540 None.

## 541 Ethics approval and consent to participate

542 All the participants gave written informed consent and consent to participate. Ethical approval was  
543 issued by the University of Exeter, College of Medicine and Health Research Ethics Committee (Ref  
544 509407).

BMJ version 1 23/10/2023

DREAM PAPER Version 8 26/09/2023

1  
2  
3 545 **Consent for publication**  
4  
5

6  
7 546 The participants gave their consent to participate in the study and to publish anonymised quotes  
8  
9 547 from the interview transcripts. The names of the participants have been anonymised.  
10

11  
12 548 **Availability of data and materials**  
13  
14

15  
16 549 Supplementary data mentioned in the text are available in the additional files.  
17

18  
19 550 **Additional files**  
20  
21

22 551 Additional file 1 contains topic guide for interviews with older people.  
23  
24

25 552 Additional file 2 contains topic guide for interviews with HCPs.  
26  
27  
28  
29  
30  
31  
32  
33  
34  
35  
36  
37  
38  
39  
40  
41  
42  
43  
44  
45  
46  
47  
48  
49  
50  
51  
52  
53  
54  
55  
56  
57  
58  
59  
60

## Topic guide –Older people and carers

**Researcher to introduce self, ask why participant interesting in taking part and orientate then as to what they will be discussing. Reminder re: confidentiality. They can pause, stop, or withdraw at any time.**

| Topic                                                                                                                                                                                                                                                                                                                                                                                                                                                                                                                                                                                                                                                                                                                                                                                                                                                                                                                                                                                                                                         | Prompts                                                                                                                                                                                                                                                                                                                                |
|-----------------------------------------------------------------------------------------------------------------------------------------------------------------------------------------------------------------------------------------------------------------------------------------------------------------------------------------------------------------------------------------------------------------------------------------------------------------------------------------------------------------------------------------------------------------------------------------------------------------------------------------------------------------------------------------------------------------------------------------------------------------------------------------------------------------------------------------------------------------------------------------------------------------------------------------------------------------------------------------------------------------------------------------------|----------------------------------------------------------------------------------------------------------------------------------------------------------------------------------------------------------------------------------------------------------------------------------------------------------------------------------------|
| <b>Background</b>                                                                                                                                                                                                                                                                                                                                                                                                                                                                                                                                                                                                                                                                                                                                                                                                                                                                                                                                                                                                                             |                                                                                                                                                                                                                                                                                                                                        |
| Could you tell me a bit about yourself and what is important to you in your life /lives?                                                                                                                                                                                                                                                                                                                                                                                                                                                                                                                                                                                                                                                                                                                                                                                                                                                                                                                                                      | Who they are? Where they live? What do they do?<br>Support networks                                                                                                                                                                                                                                                                    |
| Does your health or personal situation impact on what is important to you?                                                                                                                                                                                                                                                                                                                                                                                                                                                                                                                                                                                                                                                                                                                                                                                                                                                                                                                                                                    | How? why?)                                                                                                                                                                                                                                                                                                                             |
| <b>Appointments with health and care staff</b>                                                                                                                                                                                                                                                                                                                                                                                                                                                                                                                                                                                                                                                                                                                                                                                                                                                                                                                                                                                                |                                                                                                                                                                                                                                                                                                                                        |
| Please can you think back to a recent appointment with a health or social care professional (such as a Dr or nurse), and tell me about what happened in that appointment                                                                                                                                                                                                                                                                                                                                                                                                                                                                                                                                                                                                                                                                                                                                                                                                                                                                      | Thinking about things like asking questions, checking your ability to do something, or taking any measurements? Did you get the chance to say anything such as what is important to you                                                                                                                                                |
| What did you think about how that appointment was conducted?                                                                                                                                                                                                                                                                                                                                                                                                                                                                                                                                                                                                                                                                                                                                                                                                                                                                                                                                                                                  | Whether they would have liked anything to have been done differently, or not done at all? what you would have liked to have happened? And why?                                                                                                                                                                                         |
| If an appointment went well, what were the things that were done, that made that a positive experience for you?                                                                                                                                                                                                                                                                                                                                                                                                                                                                                                                                                                                                                                                                                                                                                                                                                                                                                                                               | Anything that could have been done differently?                                                                                                                                                                                                                                                                                        |
| Are you able to give me any examples of how the pandemic has changed how you engage with health and care staff?                                                                                                                                                                                                                                                                                                                                                                                                                                                                                                                                                                                                                                                                                                                                                                                                                                                                                                                               | What has worked well for you? What hasn't worked so well?                                                                                                                                                                                                                                                                              |
| <b>Thinking ahead</b>                                                                                                                                                                                                                                                                                                                                                                                                                                                                                                                                                                                                                                                                                                                                                                                                                                                                                                                                                                                                                         |                                                                                                                                                                                                                                                                                                                                        |
| We are exploring different ways health and care professionals might conduct appointments with older people or find out about a person's health. I am going to ask you your thoughts about different ways they could do this: <ul style="list-style-type: none"> <li>• What do you think about appointments being done remotely; for example by telephone or video?</li> <li>• What do you think about using different ways of sharing information on their current health with staff; for example filling out questionnaires?</li> <li>• What do you think about using equipment that collects information about your health, for example taking your own blood pressure and sending results to your GP?</li> <li>• What do you think about using a mobile phone to share information about how you are doing; for example, a weekly phone check-in with health or care staff?</li> <li>• What do you think about using wearable technology, for example a pedometer or fitbit that collects data about your movement or exercise?</li> </ul> | What informs their thinking, any preferences, concerns or worries? Can you think of any other older people for whom these might not be appropriate, could they make things worse, What sort of problems may pose particular challenges? Could these be helpful or beneficial to older people? What might be needed to use effectively? |
| For those who might struggle with technologies, can you think of ways in which staff can best support them to ensure they can still access to the best possible care?                                                                                                                                                                                                                                                                                                                                                                                                                                                                                                                                                                                                                                                                                                                                                                                                                                                                         | Who might struggle?                                                                                                                                                                                                                                                                                                                    |
| If we want to set up a new way of doing appointments using technology, what should we measure to see if the new way works?                                                                                                                                                                                                                                                                                                                                                                                                                                                                                                                                                                                                                                                                                                                                                                                                                                                                                                                    |                                                                                                                                                                                                                                                                                                                                        |

Is there something else that I have not asked you about, that you would like to tell me about your health and healthcare?

**Thank you.**

## Topic guide –Staff

**Researcher to introduce self, ask why participant interesting in taking part and orientate them as to what they will be discussing. Reminder re: confidentiality. They can pause, stop, or withdraw at any time.**

| Topic                                                                                                                                                                                                                                                                                                                                                                                                                                                                                                                                                                                                                                                                                                                                                                                                                                                                                                                                                                                                                                                                                  | Prompts                                                                                                                                                                                                                                                                                                             |
|----------------------------------------------------------------------------------------------------------------------------------------------------------------------------------------------------------------------------------------------------------------------------------------------------------------------------------------------------------------------------------------------------------------------------------------------------------------------------------------------------------------------------------------------------------------------------------------------------------------------------------------------------------------------------------------------------------------------------------------------------------------------------------------------------------------------------------------------------------------------------------------------------------------------------------------------------------------------------------------------------------------------------------------------------------------------------------------|---------------------------------------------------------------------------------------------------------------------------------------------------------------------------------------------------------------------------------------------------------------------------------------------------------------------|
| <b>Background</b>                                                                                                                                                                                                                                                                                                                                                                                                                                                                                                                                                                                                                                                                                                                                                                                                                                                                                                                                                                                                                                                                      |                                                                                                                                                                                                                                                                                                                     |
| Please can you tell me a bit about your professional background and current role?                                                                                                                                                                                                                                                                                                                                                                                                                                                                                                                                                                                                                                                                                                                                                                                                                                                                                                                                                                                                      | How long and in what capacity have you been working with older people? Describe the setting you work in.                                                                                                                                                                                                            |
| Please can you tell me a bit about the older people that you work with and the kinds of things that you do with them in consultations                                                                                                                                                                                                                                                                                                                                                                                                                                                                                                                                                                                                                                                                                                                                                                                                                                                                                                                                                  | Asking them questions, checking their ability to do something, or taking any measurements?; do you do things differently if they are acutely unwell vs proactive/preventative care; how do you tailor assessments and care to meet individual needs/what is important to them                                       |
| <b>Current assessments</b>                                                                                                                                                                                                                                                                                                                                                                                                                                                                                                                                                                                                                                                                                                                                                                                                                                                                                                                                                                                                                                                             |                                                                                                                                                                                                                                                                                                                     |
| What do you think older people/carers think about what you assess and how you conduct assessments                                                                                                                                                                                                                                                                                                                                                                                                                                                                                                                                                                                                                                                                                                                                                                                                                                                                                                                                                                                      | Do you think that they might like anything to be done differently, or not done at all?                                                                                                                                                                                                                              |
| If a consultation goes particularly well, what is it that you have done, that might have made that a positive experience for them?                                                                                                                                                                                                                                                                                                                                                                                                                                                                                                                                                                                                                                                                                                                                                                                                                                                                                                                                                     | Is there anything that you might do differently? If yes: can you please describe in what circumstances you might do this? And why?                                                                                                                                                                                  |
| Are you able to give me any examples of how the pandemic has changed how you engage with older people specifically?                                                                                                                                                                                                                                                                                                                                                                                                                                                                                                                                                                                                                                                                                                                                                                                                                                                                                                                                                                    | What has worked well for you? and what hasn't worked so well                                                                                                                                                                                                                                                        |
| <b>Thinking ahead</b>                                                                                                                                                                                                                                                                                                                                                                                                                                                                                                                                                                                                                                                                                                                                                                                                                                                                                                                                                                                                                                                                  |                                                                                                                                                                                                                                                                                                                     |
| Can you think of any ways in which you might be able to undertake more effective assessments with older people?                                                                                                                                                                                                                                                                                                                                                                                                                                                                                                                                                                                                                                                                                                                                                                                                                                                                                                                                                                        | What are they hoping to achieve? What is stopping them?                                                                                                                                                                                                                                                             |
| One way that assessments might be undertaken differently, is by them being undertaken remotely or by using different types of technology, and I am going to ask you your thoughts on some examples: <ul style="list-style-type: none"> <li>• What do you think conducting assessments with older people remotely; for example by telephone or video?</li> <li>• What do you think about using different ways that older people might share their information with you; for example filling out questionnaires?</li> <li>• What do you think about using equipment that collects older people's information, for example taking their own blood pressure and sending to you, you will have access to the results?</li> <li>• What do you think about older people using a mobile phone to share information about how they are doing with you; for example, a weekly phone check-in with healthcare staff?</li> <li>• What do you think about older people using wearable technology, for example a pedometer or fitbit that collects data about their movement or exercise?</li> </ul> | Prompt as to what informs their thinking, any preferences, and concerns or challenges eg any people/groups that not appropriate for/make things worse? How do you avoid inequalities in access to care<br><br>When might these be helpful or beneficial to older people? What might they need to engage effectively |
| If we were to evaluate a new intervention for older people or, what do you think that we should measure to see if it works?                                                                                                                                                                                                                                                                                                                                                                                                                                                                                                                                                                                                                                                                                                                                                                                                                                                                                                                                                            | How could we measure the impact of a new intervention?                                                                                                                                                                                                                                                              |

Is there something else that I have not asked you about, that you would like to tell me about?

**Thank you**

## COREQ (COnsolidated criteria for REporting Qualitative research) Checklist

A checklist of items that should be included in reports of qualitative research. You must report the page number in your manuscript where you consider each of the items listed in this checklist. If you have not included this information, either revise your manuscript accordingly before submitting or note N/A.

| Topic                                          | Item No. | Guide Questions/Description                                                                                                                              | Reported on Section/Page No.                      |
|------------------------------------------------|----------|----------------------------------------------------------------------------------------------------------------------------------------------------------|---------------------------------------------------|
| <b>Domain 1: Research team and reflexivity</b> |          |                                                                                                                                                          |                                                   |
| <i>Personal characteristics</i>                |          |                                                                                                                                                          |                                                   |
| Interviewer/facilitator                        | 1        | Which author/s conducted the interview or focus group?                                                                                                   | Methods/Design                                    |
| Credentials                                    | 2        | What were the researcher's credentials? E.g. PhD, MD                                                                                                     | PhD                                               |
| Occupation                                     | 3        | What was their occupation at the time of the study?                                                                                                      | Methods/Design                                    |
| Gender                                         | 4        | Was the researcher male or female?                                                                                                                       | Methods/Design                                    |
| Experience and training                        | 5        | What experience or training did the researcher have?                                                                                                     | Methods/Design                                    |
| <i>Relationship with participants</i>          |          |                                                                                                                                                          |                                                   |
| Relationship established                       | 6        | Was a relationship established prior to study commencement?                                                                                              | Methods/Sampling and recruitment                  |
| Participant knowledge of the interviewer       | 7        | What did the participants know about the researcher? e.g. personal goals, reasons for doing the research                                                 | Appendix1 and 2                                   |
| Interviewer characteristics                    | 8        | What characteristics were reported about the interviewer/facilitator? e.g. Bias, assumptions, reasons and interests in the research topic                | Declaration                                       |
| <b>Domain 2: Study design</b>                  |          |                                                                                                                                                          |                                                   |
| <i>Theoretical framework</i>                   |          |                                                                                                                                                          |                                                   |
| Methodological orientation and Theory          | 9        | What methodological orientation was stated to underpin the study? e.g. grounded theory, discourse analysis, ethnography, phenomenology, content analysis | Methods/ Data collection and Data analysis        |
| <i>Participant selection</i>                   |          |                                                                                                                                                          |                                                   |
| Sampling                                       | 10       | How were participants selected? e.g. purposive, convenience, consecutive, snowball                                                                       | Methods/Sampling and recruitment                  |
| Method of approach                             | 11       | How were participants approached? e.g. face-to-face, telephone, mail, email                                                                              | Methods/Sampling and recruitment                  |
| Sample size                                    | 12       | How many participants were in the study?                                                                                                                 | Results/older people and Healthcare professionals |
| Non-participation                              | 13       | How many people refused to participate or dropped out? Reasons?                                                                                          | Results/older people and Healthcare professionals |
| <i>Setting</i>                                 |          |                                                                                                                                                          |                                                   |
| Setting of data collection                     | 14       | Where was the data collected? e.g. home, clinic, workplace                                                                                               | Methods/Sampling and recruitment                  |
| Presence of nonparticipants                    | 15       | Was anyone else present besides the participants and researchers?                                                                                        | Results/older people                              |

|                                        |                 |                                                                                                                                    |                                                   |
|----------------------------------------|-----------------|------------------------------------------------------------------------------------------------------------------------------------|---------------------------------------------------|
| Description of sample                  | 16              | What are the important characteristics of the sample? e.g. demographic data, date                                                  | Results/older people and Healthcare professionals |
| <i>Data collection</i>                 |                 |                                                                                                                                    |                                                   |
| Interview guide                        | 17              | Were questions, prompts, guides provided by the authors? Was it pilot tested?                                                      | Methods/ Data collection                          |
| Repeat interviews                      | 18              | Were repeat inter views carried out? If yes, how many?                                                                             | NA                                                |
| Audio/visual recording                 | 19              | Did the research use audio or visual recording to collect the data?                                                                | Methods/ Data collection                          |
| Field notes                            | 20              | Were field notes made during and/or after the inter view or focus group?                                                           | Methods/ Data collection                          |
| Duration                               | 21              | What was the duration of the inter views or focus group?                                                                           | Results/older people and Healthcare professionals |
| Data saturation                        | 22              | Was data saturation discussed?                                                                                                     | NA                                                |
| Transcripts returned                   | 23              | Were transcripts returned to participants for comment and/or                                                                       | NA                                                |
| <b>Topic</b>                           | <b>Item No.</b> | <b>Guide Questions/Description</b>                                                                                                 | <b>Reported on Page No.</b>                       |
|                                        |                 | correction?                                                                                                                        | NA                                                |
| <b>Domain 3: analysis and findings</b> |                 |                                                                                                                                    |                                                   |
| <i>Data analysis</i>                   |                 |                                                                                                                                    |                                                   |
| Number of data coders                  | 24              | How many data coders coded the data?                                                                                               | Methods/ Data analysis                            |
| Description of the coding tree         | 25              | Did authors provide a description of the coding tree?                                                                              | Methods/ Data analysis                            |
| Derivation of themes                   | 26              | Were themes identified in advance or derived from the data?                                                                        | Methods/ Data analysis                            |
| Software                               | 27              | What software, if applicable, was used to manage the data?                                                                         | Methods/ Data analysis                            |
| Participant checking                   | 28              | Did participants provide feedback on the findings?                                                                                 | NA                                                |
| <i>Reporting</i>                       |                 |                                                                                                                                    |                                                   |
| Quotations presented                   | 29              | Were participant quotations presented to illustrate the themes/findings?<br>Was each quotation identified? e.g. participant number | Results                                           |
| Data and findings consistent           | 30              | Was there consistency between the data presented and the findings?                                                                 | Results and Discussion                            |
| Clarity of major themes                | 31              | Were major themes clearly presented in the findings?                                                                               | Results                                           |
| Clarity of minor themes                | 32              | Is there a description of diverse cases or discussion of minor themes?                                                             | Results                                           |

Developed from: Tong A, Sainsbury P, Craig J. Consolidated criteria for reporting qualitative research (COREQ): a 32-item checklist for interviews and focus groups. *International Journal for Quality in Health Care*. 2007. Volume 19, Number 6: pp. 349 – 357

**Once you have completed this checklist, please save a copy and upload it as part of your submission. DO NOT include this checklist as part of the main manuscript document. It must be uploaded as a separate file.**

# BMJ Open

## How can we improve Comprehensive Geriatric Assessment for older people living with frailty in primary care and community settings? A Qualitative Study

|                                 |                                                                                                                                                                                                                                                                                                                                                                                                                                                                                                                                                                                                                                                                                                                                                                                |
|---------------------------------|--------------------------------------------------------------------------------------------------------------------------------------------------------------------------------------------------------------------------------------------------------------------------------------------------------------------------------------------------------------------------------------------------------------------------------------------------------------------------------------------------------------------------------------------------------------------------------------------------------------------------------------------------------------------------------------------------------------------------------------------------------------------------------|
| Journal:                        | <i>BMJ Open</i>                                                                                                                                                                                                                                                                                                                                                                                                                                                                                                                                                                                                                                                                                                                                                                |
| Manuscript ID                   | bmjopen-2023-081304.R1                                                                                                                                                                                                                                                                                                                                                                                                                                                                                                                                                                                                                                                                                                                                                         |
| Article Type:                   | Original research                                                                                                                                                                                                                                                                                                                                                                                                                                                                                                                                                                                                                                                                                                                                                              |
| Date Submitted by the Author:   | 14-Feb-2024                                                                                                                                                                                                                                                                                                                                                                                                                                                                                                                                                                                                                                                                                                                                                                    |
| Complete List of Authors:       | Mahmoud, Aseel; University of Exeter, Faculty of Health and Life Sciences<br>Goodwin, Victoria; University of Exeter, PenCLAHRC<br>Morley, Naomi; University of Exeter, Faculty of Health and Life Sciences<br>Whitney, Julie ; King's College London, Life Sciences and Medicine<br>Lamb, Sarah; University of Exeter, Faculty of Health and Life Sciences<br>Lyndon, Helen; Cornwall Partnership NHS Foundation Trust, Adult Community Services Specialist Services Directorate; University of Plymouth, Southwest Clinical School<br>Creanor, Siobhan; University of Exeter, Faculty of Health and Life Sciences<br>Frost, Julia; University of Exeter, Faculty of Health and Life Sciences<br>DREAM, Study Team; University of Exeter, Faculty of Health and Life Sciences |
| <b>Primary Subject Heading</b>: | Geriatric medicine                                                                                                                                                                                                                                                                                                                                                                                                                                                                                                                                                                                                                                                                                                                                                             |
| Secondary Subject Heading:      | Health services research, Qualitative research                                                                                                                                                                                                                                                                                                                                                                                                                                                                                                                                                                                                                                                                                                                                 |
| Keywords:                       | QUALITATIVE RESEARCH, GERIATRIC MEDICINE, Aging, Frailty                                                                                                                                                                                                                                                                                                                                                                                                                                                                                                                                                                                                                                                                                                                       |
|                                 |                                                                                                                                                                                                                                                                                                                                                                                                                                                                                                                                                                                                                                                                                                                                                                                |

SCHOLARONE™  
Manuscripts



I, the Submitting Author has the right to grant and does grant on behalf of all authors of the Work (as defined in the below author licence), an exclusive licence and/or a non-exclusive licence for contributions from authors who are: i) UK Crown employees; ii) where BMJ has agreed a CC-BY licence shall apply, and/or iii) in accordance with the terms applicable for US Federal Government officers or employees acting as part of their official duties; on a worldwide, perpetual, irrevocable, royalty-free basis to BMJ Publishing Group Ltd ("BMJ") its licensees and where the relevant Journal is co-owned by BMJ to the co-owners of the Journal, to publish the Work in this journal and any other BMJ products and to exploit all rights, as set out in our [licence](#).

The Submitting Author accepts and understands that any supply made under these terms is made by BMJ to the Submitting Author unless you are acting as an employee on behalf of your employer or a postgraduate student of an affiliated institution which is paying any applicable article publishing charge ("APC") for Open Access articles. Where the Submitting Author wishes to make the Work available on an Open Access basis (and intends to pay the relevant APC), the terms of reuse of such Open Access shall be governed by a Creative Commons licence – details of these licences and which [Creative Commons](#) licence will apply to this Work are set out in our licence referred to above.

Other than as permitted in any relevant BMJ Author's Self Archiving Policies, I confirm this Work has not been accepted for publication elsewhere, is not being considered for publication elsewhere and does not duplicate material already published. I confirm all authors consent to publication of this Work and authorise the granting of this licence.



1  
2  
3  
4 1 **How can we improve Comprehensive Geriatric Assessment for older people living**  
5  
6 2 **with frailty in primary care and community settings? A Qualitative Study**  
7  
8

9  
10 3 Aseel Mahmoud<sup>1</sup>, \*Victoria A Goodwin<sup>1</sup>, Naomi Morley<sup>1</sup>, Julie Whitney<sup>2</sup>, Sarah E Lamb<sup>1</sup>, Helen  
11  
12 4 Lyndon<sup>3,4</sup>, Siobhan Creanor<sup>1</sup>, Julia Frost<sup>1</sup> on behalf of the DREAM Study Team  
13

14  
15 5 <sup>1</sup>Faculty of Health and Life Sciences, University of Exeter  
16

17  
18 6 <sup>2</sup>Life Sciences and Medicine, King's College London  
19

20  
21 7 <sup>3</sup>Cornwall Foundation NHS Trust, Adult Community Services Specialist Services Directorate  
22

23  
24 8 <sup>4</sup>University of Plymouth, Southwest Clinical School  
25

26  
27 9 \*Address correspondence to: Professor Victoria Goodwin, Faculty of Health and Life Sciences,  
28  
29 10 University of Exeter, UK Email: [v.goodwin@exeter.ac.uk](mailto:v.goodwin@exeter.ac.uk)  
30

31  
32 11 **Abstract**  
33

34  
35 12 **Objective**  
36

37  
38 13 With advancing age comes the increasing prevalence of frailty and increased risk of adverse  
39  
40 14 outcomes (e.g. hospitalisation). Evidence for Comprehensive Geriatric Assessment (CGA), a multi-  
41  
42 15 dimensional holistic model of care, is mixed in community settings. Uncertainties remain, such as the  
43  
44 16 key components of CGA, who delivers it, and the use of technology. This study aimed to understand  
45  
46 17 perspectives, beliefs and experiences, of both older people and health professionals, to improve the  
47  
48 18 current CGA, and explore factors that may impact on CGA delivery in community settings.  
49

50  
51 19 **Design**  
52

53  
54 20 A qualitative interview study was conducted with older people and health care professionals  
55  
56 21 identified using a maximum variation strategy. Data were analysed using an abductive analysis  
57  
58 22 approach. The Non-adoption, Abandonment, Scale-up, Spread and Sustainability (NASSS) framework  
59  
60

23 and the Theoretical Framework of Acceptability guided the categorisation of the codes, and  
24 identified categories were mapped to the two frameworks.

## 25 **Setting**

26 England, United Kingdom

## 27 **Results**

28 Twenty-seven people were interviewed, constituting 14 older people and 13 healthcare  
29 professionals (HCPs). We identified limitations in the current CGA: a lack of information sharing  
30 between different healthcare professionals who deliver CGA; poor communication between older  
31 people and their HCPs; and a lack of follow-up as part of CGA. When we discussed the potential for  
32 CGA to utilise technology, HCPs and older people varied in their readiness to engage with it.

## 33 **Conclusions**

34 Viable solutions to address gaps in the current delivery of CGA include the provision of training and  
35 support to use digital technology and a designated comprehensive care coordinator. The next stage  
36 of this research will use these findings, existing evidence and stakeholder engagement, to develop  
37 and refine a model of community based CGA that can be assessed for feasibility and acceptability.

## 38 **Keywords**

39 Ageing, comprehensive geriatric assessment, digital technology, frailty, qualitative.

## 40 **Strengths and Limitations**

- 41 • Use of qualitative interviews enabled rich data on exploration and synthesis of older people  
42 and healthcare professionals.
- 43 • Our theoretically informed qualitative research and stakeholder insights identified both  
44 challenges to the current delivery of CGA as well as opportunities for the improvement of  
45 CGA for older people with frailty.

- 1  
2  
3 46       • Our study is deliberately exploratory; thus the findings may not be transferable to other  
4  
5 47           older people and healthcare professionals. However, we recruited older people with frailty  
6  
7 48           and HCPs with a wide variety of views and experiences.  
8  
9

## 10 49 **Introduction**

11  
12  
13  
14 50   Between 2020 and 2050 the number of people worldwide aged over 80 will triple to reach 26 million  
15  
16 51   (1). With ageing, people are more susceptible to develop multiple, long-term conditions that reduce  
17  
18 52   their independence and quality of life (1-4). This is due to underlying factors, such as falls, frailty, and  
19  
20 53   delirium (1, 3).

21  
22  
23  
24 54   Frailty is a clinical syndrome where multiple body systems deteriorate leading to increased  
25  
26 55   vulnerability (3, 5). Frailty increases the risk of falls, disability, hospitalisation, mortality, and contact  
27  
28 56   with healthcare services (5, 6). Prevention and reversal of frailty can enable people to stay well and  
29  
30 57   live independently for longer (3). Frailty affects half of the UK population aged over 85 and costs the  
31  
32 58   publicly funded National Health Service (NHS) £5.8 billion per year (6). A key priority of the NHS in  
33  
34 59   the UK is to support older people with frailty to manage their long-term conditions (3, 7).

35  
36  
37  
38 60   Older people living with frailty need robust interventions tailored to the complexity of their care  
39  
40 61   needs (3, 8). Comprehensive Geriatric Assessment (CGA) is a multi-dimensional diagnostic and  
41  
42 62   therapeutic intervention that includes an assessment of physical, cognitive and psychosocial  
43  
44 63   components with the development of a holistic management plan in partnership with the older  
45  
46 64   person with frailty (8). CGA delivered in acute, primary and community settings aims to prevent  
47  
48 65   deterioration and complications associated with frailty (3, 9). However, the effectiveness of CGA for  
49  
50 66   older people with frailty in primary care and community settings is mixed (8, 10, 11). Ho et al  
51  
52 67   reported benefits in terms of the likelihood of living at home, reduced mortality, improved cognition,  
53  
54 68   and activities of daily living, but with uncertain benefits on quality of life (11), whereas Briggs and  
55  
56 69   colleagues found no difference in mortality, activities of daily living, quality of life and care home  
57  
58  
59  
60

1  
2  
3 70 admissions (8). Descriptions of CGA components often lack detail, including the delineation of staff  
4  
5 71 involved in delivery, and an understanding about factors that affect implementation are limited (12).  
6  
7  
8 72 Recent NHS initiatives to strengthen the efficiency of outpatient services using alternative  
9  
10 73 approaches require consideration. For example, there is growing interest in the use of wearable  
11  
12 74 devices to monitor patients (7). The NHS Long Term Plan, and Digital Transformation Plan,  
13  
14 75 recommend the use of digital equipment in the assessment and monitoring of older people with  
15  
16 76 frailty; with the option of using wearable devices to ensure services are inclusive and available to all  
17  
18 77 (7, 12). However, digital technologies are not part of the existing evidence for CGA.  
19  
20  
21  
22 78 Regardless of the complexity and diversity of the needs of older people with frailty, some face  
23  
24 79 inequities in access to interventions which may help to maintain or improve their independence (3).  
25  
26 80 For example, whilst telemedicine can be beneficial, cost-effective and acceptable to older people (13),  
27  
28 81 there are concerns about digital exclusion (14) and risks that important signs and symptoms could be  
29  
30 82 missed (15). Improving the effectiveness and efficiency of CGA (11) requires exploration of how  
31  
32 83 individual components may work and how the overall intervention can be enhanced. The Digital and  
33  
34 84 Remote Enhancement for the Assessment and Management of Older People with Frailty (DREAM)  
35  
36 85 project aimed to develop a community-based model of CGA that incorporated technology. This  
37  
38 86 qualitative study aimed to understand perspectives, beliefs and experiences of both actual and  
39  
40 87 potential providers and users to improve the current CGA and explore the factors that may impact  
41  
42 88 on CGA delivery in community settings, including the use of technology.  
43  
44  
45  
46  
47

## 48 **Methods**

### 51 **Design**

52  
53 91 A qualitative interview study with older people and health care professionals was conducted. AM, a  
54  
55 92 female post-doctoral research fellow and pharmacist, collected and analysed the data in  
56  
57 93 collaboration with VG (a female academic physiotherapist) and JF (a female medical sociologist). All  
58  
59  
60

1  
2  
3 94 had experience of conducting qualitative research. Ethical approval was issued by the University of  
4  
5 95 Exeter, College of Medicine and Health Research Ethics Committee (Ref 509407). The study has been  
6  
7 96 reported according to the Consolidated Criteria for Reporting Qualitative Study (COREQ) guidelines  
8  
9  
10 97 (16).

### 98 **Patient and Public Engagement**

99 Patient Public Involvement and Engagement (PPIE) and Health and Care Professional (HCP) advisory  
100 groups contributed to the development, design and conduct of this research through a series of  
101 workshops. They contributed to developing and piloting topic guides for the interviews and provided  
102 analytical insight into preliminary findings through discussions.

### 103 **Sampling and Recruitment**

#### 104 *Older people*

105 Participants were recruited from the Community Ageing Research (CARE) 75+ (17) or the Oxford Pain  
106 Activity and Lifestyle (OPAL) (18) cohorts. Both CARE75+ and OPAL are representative, prospective  
107 longitudinal studies designed as both epidemiological studies of older people living in the  
108 community in the UK and as recruitment platforms to help overcome some of the challenges of  
109 older people being under-represented in research (19). We applied a maximum variation sampling  
110 strategy to identify Care75+ and OPAL participants who had consented to be contacted, to capture  
111 diversity in gender, ethnicity, living circumstances, socioeconomic factors, geography, frailty, sensory  
112 (e.g. visual or hearing problems), and memory problems. Batches of invitations to participate were  
113 sent out to 15-20 people at a time by AM (for Care75+ participants) and the OPAL research team (for  
114 OPAL participants). In total, 132 invitations were sent out. We continued recruiting from May 2022  
115 to December 202 until our concurrent analysis yielded an in-depth understanding of where and how  
116 CGA might be improved.

#### 117 *Healthcare Professionals*

1  
2  
3 118 For healthcare professionals, we also used a maximum variation sampling strategy (21), to ensure  
4  
5 119 representation of professional background, geographical location, and gender. We invited health  
6  
7 120 and social care professionals working in non-hospital settings in the UK working with older people  
8  
9 121 living with frailty via social media (Twitter and Facebook) and via professional networks.  
10  
11  
12

13 122 All older people and healthcare professionals who expressed an interest in taking part were  
14  
15 123 recruited.  
16  
17

### 18 124 **Data collection**

19  
20 125 We developed semi-structured topic guides (21, 22) for older people (Additional file 1) and HCPs  
21  
22 126 (Additional file 2) based on a review of literature and online workshop discussions with our two  
23  
24 127 advisory groups made up of older people, family members, and HCPs. We did not use the term CGA  
25  
26 128 in the interviews with older people as advised by the two advisory groups. Topic domains were  
27  
28 129 aligned to the Non-adoption, Abandonment, Scale up, Spread and Sustainability (NASSS) framework  
29  
30 130 to ensure collection of rich data and to explicitly focus our analysis on how best to improve CGA (23).  
31  
32 131 The NASSS framework has previously been used to explain the interacting factors that affect the  
33  
34 132 implementation of complex interventions that utilise technology and generate mixed outcomes (23,  
35  
36 133 24). AM piloted the topic guide with members of the PPIE advisory group and refined one question  
37  
38 134 (concerning outcomes to be measured) for clarity. The topic guide enabled consistency in the data  
39  
40 135 collection, with the interviews flexible enough to allow the participants to explain what was  
41  
42 136 important to them (25). The interviews were conducted face-to-face, via telephone or video call,  
43  
44 137 depending on the participants' preference (21). AM introduced herself and explained the aim of the  
45  
46 138 study to the interviewee at the beginning of each interview. The audio-recorded interviews were  
47  
48 139 transcribed by a GDPR compliant transcriber and checked for accuracy by AM. Fieldnotes captured  
49  
50 140 the context of the interview. AM had no previous contact with any of the participants.  
51  
52  
53  
54  
55  
56  
57  
58  
59  
60

## 141 **Data analysis**

142 We undertook abductive analysis (26), and used NVivo 13 (Release 1.7) (27) to manage the data. This  
143 involved an iterative approach to analysis, to facilitate understanding (25, 28). We coded the  
144 interviews in cycles, with deductive codes from the literature and inductive codes generated by AM,  
145 identifying similar ideas or concepts that could be categorised into a code (25, 29). This enabled  
146 balance between data relating to pre-existing concepts and data based on the perspectives of the  
147 participants (26, 30). We (AM, VG and JF) then developed a conceptual map of the different  
148 participants' perspectives (22). The NASSS framework, and the Theoretical Framework of  
149 Acceptability (23, 31) guided the categorisation of the codes. The categories were then mapped to  
150 the two frameworks, which enabled further elaboration of the complexity within the domains of an  
151 intended CGA intervention that utilises technology. For example, the broad analytical category  
152 'Organisation' was constituted by various coding categories, including person-centred and accessible  
153 records, digital enabling for staff, information sharing between HCPs and continuity of care. We used  
154 a conceptual map to create a hypothetical case (vignette) of an older person who participated in a  
155 CGA that used technology (32). We used the vignette in the final three interviews with HCPs, to  
156 extend our understanding of the potential afforded by technology. Preliminary findings were  
157 presented to the advisory groups for discussion and consideration of their interpretations.

## 158 **Results**

### 159 **Older people**

160 Fourteen older people consented to participate and were interviewed. Respondents were aged  
161 between 75 and 90 years old, were evenly split between males and females, and included  
162 participants with hearing and/or visual impairment, mobility impairments, and with one or more  
163 long term condition. One participant asked to be interviewed in the presence of their carer (a  
164 spouse). The interviews lasted between 16 and 92 minutes. (Table 1).

165 *Table 1 Demographic characteristics of older people with frailty*

| Participant Pseudonym | Gender | Age | Current residence in England | Living circumstances | Mode of interview   |
|-----------------------|--------|-----|------------------------------|----------------------|---------------------|
| Robert                | Male   | 84  | North East                   | Live alone           | Telephone interview |
| James                 | Male   | 83  | South West                   | Live alone           | In-person interview |
| Richard               | Male   | 82  | South West                   | Live with spouse     | Online audio call   |
| William               | Male   | 90  | North East                   | Live with spouse     | Online video call   |
| Barbara               | Female | 82  | North East                   | Live with spouse     | Telephone interview |
| Gary                  | Male   | 76  | North East                   | Live with spouse     | Telephone interview |
| Karen                 | Female | 79  | South East                   | Live alone           | Online video call   |
| Steven                | Male   | 75  | South East                   | Live with spouse     | Telephone interview |
| Shirley               | Female | 79  | Midlands                     | Live alone           | Telephone interview |
| Frances               | Female | 89  | South East                   | Live alone           | Telephone interview |
| Carol                 | Female | 82  | North West                   | Live alone           | Telephone interview |
| Donna                 | Female | 85  | South East                   | Live alone           | Telephone interview |
| Frank                 | Male   | 80  | Midlands                     | Live with spouse     | Telephone interview |
| Lois                  | Female | 86  | South West                   | Live with spouse     | Telephone interview |

166

### 167 Healthcare professionals

168 The thirteen HCPs came from different professional backgrounds, and from different geographical  
 169 areas of England. All of the participants were working, or had worked, with older people with frailty,  
 170 for a duration of two to 30 years (Table 2). The interview duration ranged between 33 and 160  
 171 minutes.

172 *Table 2 Demographic characteristics for HCPs who participated in the study*

| Participant number | Profession                     | Years of providing care to older people | Location in England | Gender | Mode of interview |
|--------------------|--------------------------------|-----------------------------------------|---------------------|--------|-------------------|
| HP1                | Frailty assistant practitioner | 20                                      | South West          | Female | Online            |
| HP2                | Nurse                          | 15                                      | South West          | Male   | Online            |
| HP3                | GP                             | Retired                                 | North East          | Female | Online            |
| HP4                | Physiotherapist                | 19                                      | South West          | Female | Online            |



|      |                         |    |            |        |        |
|------|-------------------------|----|------------|--------|--------|
| HP5  | GP                      | 16 | South West | Female | Online |
| HP6  | Physiotherapist         | 30 | South West | Female | Online |
| HP7  | Nurse                   | 15 | South West | Female | Online |
| HP8  | Nurse                   | 2  | South East | Female | Online |
| HP9  | Occupational therapist  | 10 | South East | Female | Online |
| HP10 | Consultant Geriatrician | 23 | North West | Male   | Online |
| HP11 | Consultant Geriatrician | 19 | Midlands   | Female | Online |
| HP12 | Physiotherapist         | 4  | Midlands   | Female | Online |
| HP13 | Pharmacist              | 3  | North West | Female | Online |

173

174 We identified patterns about the conditions to enhance CGA across the two data sets, then classified  
 175 these patterns into the eight domains of the NASSS framework and to the Framework of  
 176 Acceptability (23, 31). Here we present the four domains that were most important for both the  
 177 patient and professional participants: frailty (the condition), intended adopters (both professional  
 178 and lay), organisational factors (such as workforce challenges), and acceptability (of technology and  
 179 assessment).

### 180 **Frailty**

181 Amongst HCPs, there was an appreciation of the complexity of frailty. Regardless of whether they  
 182 have a need for acute care or not, all older people with frailty have complex needs due to having  
 183 multiple long-term conditions, impairments and/or socioeconomic factors:

---

184 *“Most of them are aged 80 almost all of them are frail and so they have multiple chronic*  
 185 *conditions, they have got polypharmacy they tend to need some help with one or more*  
 186 *activities of daily living”.* (HP13, Pharmacist)

---

187 HCPs from different professions tend to provide a comprehensive assessment that involves physical,  
 188 psychological and social needs for older people with acute and non-acute care needs. However,  
 189 there is a need to provide older frail people with assessment prior to a crisis developing:

---

190 *“All the domains yeah, the psychological, physical all those you know functional,*  
 191 *environmental you know do you live in a house, a flat, bungalow, do you sleep upstairs, any*  
 192 *falls you know any equipment in the toilet, that kind of thing and social you know do you*  
 193 *get out.” (HP12, Physiotherapist)*

194 *“So, if you’re trying to keep somebody weller for longer, then any of those proactive*  
 195 *interventions rather than waiting until they get to crisis point.” (HP9, Occupational*  
 196 *therapist)*

---

197 We interviewed older people with frailty who were socioeconomically disadvantaged and/or  
 198 experienced sensory or physical impairment that can exacerbate the complexity of their care needs.  
 199 For example, Carol had financial challenges, restricted mobility, visual impairment, multiple long-  
 200 term conditions, and a high risk of falling. Carol had limited choices in access to care, because of her  
 201 restricted ability to travel to appointments, lack of a support network, and no access to technology:

---

202 *“I’ve been a single person all my life and I get the basic state pension. So, I’ve never ever*  
 203 *been able to afford the technology that people use every day to day in these days and*  
 204 *that’s the reason I don’t have it.” (Carol, 82 years old)*

---

205 On the other hand, Karen lived alone, but has regular communication with family and friends. During  
 206 her health and care journey, Karen was able to enact her own health decisions and avoided long NHS  
 207 waiting time for tests and referrals:

---

208 *“I only saw the consultant yesterday, so the next steps haven’t been put in place yet.*  
 209 *Unfortunately, I have had to pay privately for it and the NHS seems to be in such a mess*  
 210 *and the doctor did want to send me off for tests but she couldn’t justify so, more or less*  
 211 *saying well you know it is as it is we can’t do anything more for you because we haven’t got*  
 212 *proof that this test or that test is something we can do, something we can justify. [...] I’ll*  
 213 *have to pay for that privately otherwise I will just be waiting too long. You know I am*  
 214 *getting on I don’t want the last two or three years probably of my life to be sitting around*  
 215 *at home feeling sorry for myself.” (Karen, 79 years old)*

---

## 216 **Intended adopters**

217 Some HCPs indicated that an HCPs occupational background may inform the scope of assessment  
 218 during the CGA, and the quality of the CGA that they offer. A nurse who led a frailty team showed

1  
2  
3 219 appreciation of the range of HCP backgrounds in their team, which enabled them to involve the  
4  
5 220 most suitable HCP (e.g. in terms of their skill set), to meet the unique needs of the older person:  
6  
7  
8  
9

---

10 221 *“obviously if it was things like their ability to perform their physical activity to daily living*  
11 222 *that maybe something that I would involve one of, I’ve got a colleague who is Band 4*  
12 223 *assistant practitioner whose got a therapy background she’s very good at looking at the*  
13 224 *nuts and bolts of how people physically manage [...] I will also do joint visits with OTs and*  
14 225 *physios if we’re feeling that we need to, that there’s a, that the referral makes it sound like*  
15 226 *this is very much that mixed picture of it’s not just a medical requirement or a strict nursing*  
16 227 *requirement that there’s an overlap with where my therapy colleagues would come in”.*  
17 228 *(HP2, Nurse)*  
18  
19

---

20  
21 229 This contrasted consultant geriatrician (HP11) who also led a frailty team. HP11 indicated that  
22  
23 230 regardless of the different backgrounds of HCPs in their team, there should be no differences in the  
24  
25 231 CGA that they provide to older people with frailty. However, HP11 highlighted that some professions  
26  
27 232 may have limited ability to understand the complexity of older people’s care needs. This was  
28  
29 233 congruent with the views from older people who thought that their care needs could be managed  
30  
31 234 better by an HCP with knowledge and experience of older people with frailty:  
32  
33  
34  
35

---

36  
37 235 *“They all do the same because they’ve all had their advanced [...], course the advanced*  
38 236 *assessment healthcare assessment course. They’ve all done the same course ok,”. (HP11,*  
39 237 *Consultant Geriatrician)*  
40  
41

42 238 *“You could have one doctor who is in the practice who specialised in old people you know*  
43 239 *just for the aged to sort of he specialised in the aged. [...] where old people could feel they*  
44 240 *could go [...] rather than a general practitioner maybe somebody that was for the old and*  
45 241 *the frail.” (Barbara, 82 years old)*  
46  
47

---

48  
49 242 A GP (HP3) thought that the ability to deliver CGA depends upon the investigative and  
50  
51 243 communication skills, and previous experience of staff, and it is not restricted to a particular  
52  
53 244 background:  
54  
55  
56

---

57  
58 245 *“So, I tend to work on a concept that I don’t like thinking about professions doing things I*  
59 246 *like to think about competencies.” (HP3, GP)*  
60

1  
2  
3 247 Some HCPs suggested that HCPs may require training to improve interpersonal skills, in terms of  
4  
5 248 communication and attention to detail, to ensure enhancement of CGA. For example, HP12 (a  
6  
7 249 Physiotherapist) shared their personal experience of developing their investigational skills when  
8  
9 250 providing remote CGA over time. HP7 (a Nurse) shared their experience of supporting new HCPs in  
10  
11 251 their team to learn how to pick-up non-verbal cues during home visits, to support identifying care  
12  
13 252 needs and provide CGA.  
14  
15

### 17 253 **Organisation**

18  
19 254 Interviewing HCPs from different geographical areas of England allowed us to explore organisational  
20  
21 255 limitations, which would require innovation to increase readiness for new forms of technology-  
22  
23 256 informed care delivery.  
24  
25

26  
27 257 Some HCPs made references to fear and resistance to trying new ways of care delivery. For example,  
28  
29 258 a nurse (HP2) referred to themselves as ‘a dinosaur’ when it comes to trying new technologies.  
30  
31 259 Similarly, a frailty assistant practitioner (HP1) also indicated that practitioners may need support  
32  
33 260 from colleagues, while a consultant geriatrician (HP11) shared the challenges they had when using  
34  
35 261 technology and the time needed for training to use new technology:  
36  
37  
38  
39

---

40 262 *“There’s also the training aspect of it. Training takes a long time you go in and sit down and*  
41 263 *have training whatever new technology comes you have to find time to go for training and*  
42 264 *you actually don’t get to understand its use until you start using it and the problems that*  
43 265 *you get when you start using it”. (HP11, Consultant Geriatrician)*  
44  
45

---

46  
47 266 Almost all HCPs discussed the negative impact of using different clinical databases in various settings  
48  
49 267 on their ability to share and/or access patients’ records. HCPs discussed the importance of having a  
50  
51 268 well-established information sharing process between HCPs in different settings in enhancement of  
52  
53 269 CGA. HCPs shared their experiences of meeting the challenges in information sharing. For example,  
54  
55 270 sharing data in regular Multi-Disciplinary Team (MDT) meetings, provides access to the GP medical  
56  
57 271 records for HCPs who work in the community, which enables them to effectively support the older  
58  
59  
60

1  
2  
3 272 people with whom they work. Some organisations have a sharing document that all HCPs involved in  
4  
5 273 CGA can use to input and share data, which staff found beneficial in terms of the availability of  
6  
7  
8 274 information and efficiency in obtaining key information when needed:  
9  
10

---

11  
12 275 *“I’ve not seen they’ve had a CGA, their clinical frailty scale is this, blah, blah, blah never*  
13 276 *seen it never ever. Never ever, ever seen it. So, information is not coming it is not flowing”.*  
14 277 *(HP12, Physiotherapist)*  
15

16  
17 278 *“I just from previous experience I knew these sorts of things I needed to have so I made*  
18 279 *sure that I discussed it with the CCG and got them to put this in place because I didn’t want*  
19 280 *to be spending exactly like the nurse, two hours, trying to get information when in five*  
20 281 *minutes I can have that information.” (HP10, Consultant Geriatrician)*  
21  
22

23 282 *“So, for me to be able to know what medicines somebody is on, I have to have access to*  
24 283 *that or I’ve got ask somebody who has access to check for me ok”. (HP11, Consultant*  
25 284 *Geriatrician)*  
26  
27

---

28  
29 285 Lack of staff capacity was perceived as a limitation for delivering CGA by all HCPs, which may inhibit  
30  
31 286 delivery of timely support which an older people may require. Some older people recognised the  
32  
33 287 limited staff availability and the increasing demands on the GP practices that inhibit continuity in  
34  
35 288 care. For them, lack of continuity decreases their engagement with their care:  
36  
37  
38

---

39  
40 289 *“More of us, more availability [...] I mean we are running its sort of like a virtual ward model*  
41 290 *but it’s going to be, we have less staff on at a weekend. So, our capacity to take new*  
42 291 *referrals on a Friday and over the weekend is a lot less.” (HP9, Occupational therapist)*  
43  
44

45 292 *““When you see the doctor, you know you barely it’s a locum that I see I don’t see my own*  
46 293 *doctor.”.” (Shirley, 79 years old)*  
47  
48

---

49  
50 294 Other older people with frailty understood the current workforce challenges in the NHS and  
51  
52 295 suggested that improved communication between HCPs and sharing information may mitigate the  
53  
54 296 current lack of continuity:  
55  
56  
57  
58  
59  
60

---

297 *“GPs talk to each other and that you know if you go in and you see somebody who is not*  
298 *your designated GP you know that fine well that the notes are there [...]. So, you feel*  
299 *perfectly happy that you know whoever you are seeing, knows what they are talking*  
300 *about.” (Lois, 86 years old)*

---

301 However, we identified that when an older person can identify a key contact person to support  
302 them, this can mitigate a lack of continuity in their care, because they key person can co-ordinate  
303 their care and ensure the continuous flow of communication:

---

304 *“So, I sort of stayed involved in this case as a coordinating factor because you know it*  
305 *happens when too many people are involved things the outcome might not be good or the*  
306 *people can get lost in translation and so I managed to speak to the mental health team and*  
307 *everything and draw all the people that the GP had referred to, to a point where I said now,*  
308 *you need to take this forward.” (HP12, Physiotherapist)*

---

### 309 **Acceptability**

310 We identified elements that might influence acceptability by older people with frailty, that should be  
311 taken into consideration when enhancing CGA.

312 Although HCPs perceived that older people were satisfied with CGA and the care provided to them,  
313 some older people indicated that they could not freely communicate with HCPs and express their  
314 needs, because of perceived short appointments with their GP. Furthermore, older people lacked  
315 trust in their HCPs, or the clinical decisions made about their treatment plan:

---

316 *“I would say the consistent feedback is normally that they’re greatly relieved that we’ve*  
317 *given the time ‘cos we don’t time specify our visits” (HP2, Nurse)*

318 *“No, it’s so quick and it’s so, I mean in person, well I wouldn’t say personal you know when*  
319 *you speak to a doctor like I did with my old doctor if he, it was just a different attitude*  
320 *towards you, it’s like a conveyor belt, you come in, you go out, you come in and you go out*  
321 *so, you know you just feel it’s not the same what it was before.” (Shirley, 79 years old)*

---

322 Moreover, HCPs acknowledged the variation in older people readiness to engage with new ways of  
323 care delivery:

---

324 *“There is a high risk of inequalities because anytime you are going introduce something*  
325 *different new, there are going to be people who can use it very easily and there are going*  
326 *to be those who can’t for whatever reasons”. (HP13, Pharmacist)*

---

327 This aligned with the findings from interviews with the older people themselves. For example, Karen  
328 showed readiness to engage with new ways of receiving technology-informed care because she had  
329 previous experience of using technology in her healthcare, and in communication with family  
330 members. In contrast, Shirley rejected engagement with new forms of remote appointments:

---

331 *“They did ask me once yes, but I said, well, I don’t know how to do it, let’s put it that way a*  
332 *video appointment I mean I don’t [...] I have a mobile phone so, you know I just don’t know*  
333 *how to do it. So, the other solution was that they speak to me over the phone”. (Shirley, 79*  
334 *years old)*

---

335 Lack of physical access to technology (e.g. a device or internet connection) can inhibit an older  
336 person's opportunity to learn how to use technology, which may subsequently limit their readiness  
337 to engage with new forms of technology informed care. Therefore, those with frailty may require  
338 additional support to engage with CGA that utilises technology. For example, older people with  
339 sensory impairment may require specialist adaptation to their device, or support from a carer to  
340 engage; whereas older people who are already digitally literate may only need educational input on  
341 how to use a new technology.

342 HCPs recognised the variation in the needs and preferences of older people with frailty and  
343 discussed how they tailor CGA to the person’s needs:

---

344 *“I would say we’re able to be very person-centred we’re not looking at things from a*  
345 *clinician’s perspective only we will explore things from the patient’s perspective in terms of*  
346 *what they think is their problems.” (HP4, Physiotherapist)*

---

347 Some HCPs thought that the presence of a carer, a family member or support network may increase  
348 a frail older person's acceptance of CGA that utilises technology. However, HCPs acknowledged the

1  
2  
3 349 higher demands on the carer which may reduce the support they can provide, to help the older adult  
4  
5 350 engage with technology. A GP (HP3) shared examples of caregivers who inadvertently disempower  
6  
7 351 the older person, in terms of decision-making about their healthcare choices. Older people may  
8  
9  
10 352 therefore require support from a wider network, and not only their carer:  
11  
12

---

13  
14 353 *“Some of them have families who help them but they still like you know eye contact,*  
15 354 *physical contact and the written word, you know paper, hard copy of anything. So, I am*  
16 355 *afraid that’s something that they’ll eventually all pop off but and thankfully the younger*  
17 356 *ones are you know quite capable of using all these devices.” (Barbara, 82 years old)*  
18  
19

---

20  
21 357 HCPs may not be able to provide the required follow-up after an assessment, important for tracking  
22  
23 358 the referrals to other services if needed and the management plan provided to the patient. Similarly,  
24  
25 359 older people explained the challenges that they were facing in following-up the HCPs; for example,  
26  
27 360 to find out the result of a test, or to book an appointment:  
28  
29  
30

---

31  
32  
33 361 *“I would like to think we’re good at going out and identifying the problem we’re good at*  
34 362 *negotiating a management plan with someone it’s then how do you monitor the effect of*  
35 363 *that management plan”. (HP2, Nurse)*  
36

37 364 *“I had to phone my practice after I’d been to see the 111 doctor and she said get in touch*  
38 365 *with your practice and I got this sort of non-committal reply oh, well you’d better start your*  
39 366 *antibiotics and I was quite disappointed that they didn’t get in touch with me because*  
40 367 *they’d given me that advice without having seen a report and I thought well I would have*  
41 368 *expected something to come back but like I said, I was really not well enough to do*  
42 369 *anything about it”. (Donna, 85 years old)*  
43  
44

---

## 45 46 370 **Discussion**

47  
48  
49  
50 371 This study explored the factors that may impact on CGA delivery in community settings, including  
51  
52 372 the use of technology. This research adds to the current growing evidence on challenges on  
53  
54 373 delivering effective CGA in community settings and identified factors to enhance CGA in community  
55  
56 374 settings from the perspectives of older people and HCPs.  
57  
58  
59  
60



1  
2  
3 375 In this study, we identified key challenges to the enhancement of CGA in the community, including:  
4  
5 376 information sharing between different HCPs who are delivering the CGA; communication between  
6  
7 377 older people and their HCPs; and follow-up appointments after conducting the CGA. From the  
8  
9 378 current challenges that were explained by participants, and suggestions which they made to address  
10  
11 379 them, workshop discussions with advisory group members and existing literature, we identified  
12  
13 380 factors to enhance CGA in the community.  
14  
15  
16

17 381 Both HCPs and older people considered that the delivery of CGA should not be limited to those from  
18  
19 382 specific professions but should be based upon HCPs competency and knowledge of the complexity of  
20  
21 383 need for older people with frailty. This finding aligns with the Ageing Well Network of Enhanced Care  
22  
23 384 for older People (EnCOP) competency framework (33); an aim of which is to enhance staff  
24  
25 385 competency in working anywhere in the care system (33). The Health Education England and NHS  
26  
27 386 England commissioned the Frailty Core Capabilities Framework in 2018 to identify skills and  
28  
29 387 behaviours required to deliver high quality of care to older people with frailty (34). However, there is  
30  
31 388 limited use of the framework in commissioning education or training, reflected in the results of  
32  
33 389 evaluation surveys that were conducted in 2018 and 2019 (35). We suggest that upskilling staff and  
34  
35 390 providing them with appropriate training to improve their communication and investigation skills  
36  
37 391 may be a viable solution to mitigate the negative impact of workforce shortages on the effectiveness  
38  
39 392 of CGA.  
40  
41  
42  
43  
44

45 393 From conducting interviews augmented by workshop discussions with advisory group members, we  
46  
47 394 identified the need for assigning a member of staff or MDT team to a co-ordinating role, which we  
48  
49 395 designated as "Comprehensive Care Coordinator". This person could coordinate the delivery of CGA  
50  
51 396 by facilitating information sharing between different HCPs, communicating with older people with  
52  
53 397 frailty on a regular basis, and ensuring that the management plan including referrals is acted upon.  
54  
55 398 Designating a care coordinator may improve continuity of care with one point of contact and provide  
56  
57 399 reassurance through a therapeutic, long-term relationship. This may provide reassurance to the  
58  
59  
60

1  
2  
3 400 older person and ensure effective follow-up of any management plan. Care coordinator roles in the  
4  
5 401 community, including case managers, may reduce emergencies. However, evidence shows variation  
6  
7 402 in the role in different studies in terms of duration and frequency of home visits and HCPs who  
8  
9  
10 403 coordinated the care (11, 36, 37). Further research needs to identify who could best coordinate care  
11  
12 404 in older people and what the best approach may be.

13  
14  
15 405 Moreover, HCPs agreed that utilising technology in the delivery of CGA may enable HCPs to provide  
16  
17 406 support for older people without compromising their follow-up. The NHS plan highlighted the need  
18  
19 407 for enhancing the use of technology in healthcare, to change how care is being provided to patients;  
20  
21 408 and to create joined up computer systems that give staff sufficient access to data, to provide  
22  
23  
24 409 improved care for patients (7). However, there is a need for digital upskilling of staff to support their  
25  
26 410 effective use of technology in healthcare (38).

27  
28  
29 411 Different IT-systems and a lack of information governance arrangements across different settings  
30  
31 412 currently inhibits information sharing and creates tension between HCPs in different settings. HCPs  
32  
33 413 told us that the lack of connection between different systems must be addressed, if they are to  
34  
35 414 deliver an effective CGA. Similarly, older people mentioned how lack of access to information  
36  
37 415 magnified unequal access to effective CGA, and support and care for older people with frailty. In  
38  
39  
40 416 February 2023, NHS Digital became responsible for digital technology, data and health and care  
41  
42 417 delivery. This has the potential to address some of the challenges in information sharing (39).

43  
44  
45 418 Existing research has identified the need for convenient platforms and improved digital records for  
46  
47 419 integrated care services for older people (including CGA) that maintain privacy and security when  
48  
49 420 sharing patient data between MDTs (38, 40). Such integrated platforms may enhance  
50  
51 421 communication and coordination of care (38, 40). However, resolving existing operational  
52  
53 422 complexities is likely to require additional funding and the creation of interoperable IT-systems (7,  
54  
55 423 38, 39, 41).

1  
2  
3 424 We found that socioeconomic factors, including living circumstances, income, and social network  
4  
5 425 impacted older peoples' treatment choices; in terms of whether they visited a clinical specialist and  
6  
7 426 waiting times for NHS appointments. This implies that when developing the CGA that utilises  
8  
9 427 technology we need to consider how to mitigate socioeconomic factors that inhibit access and  
10  
11 428 capacity to obtain the benefits of using digital equipment in the assessment and follow-up. Existing  
12  
13 429 research suggests that digital interventions are less effective in populations with socioeconomic  
14  
15 430 disadvantage compared with those with higher socioeconomic status (42). Although the COVID 19  
16  
17 431 pandemic accelerated the shift to online resources and services, and changed patient perceptions  
18  
19 432 and willingness to use technology, it increased digital inequalities (43, 44). Amongst those aged 75  
20  
21 433 and over in the UK, 42% do not use the internet, reporting a lack of digital skills as the main  
22  
23 434 reason (45). However, the older population is changing, and the next generation of older people are  
24  
25 435 more familiar with using technology, with 77% of those aged over 55 using a smart phone (46), and  
26  
27 436 55% of those aged 50-64 using the internet most days (45). However, increasing physical access to  
28  
29 437 connected devices and the internet alone may not be enough to reduce inequalities in access to CGA  
30  
31 438 that utilises technology (42, 43, 47). Therefore, training and support would be needed to ensure  
32  
33 439 older people could be digitally enabled; however, this may not be appropriate for everyone, and  
34  
35 440 support would need to be individualised (45).

36  
37 441 Using technology for monitoring and supporting older people with frailty is an NHS priority, and over  
38  
39 442 time there may be more opportunities for older people with frailty to access and use technology (7).  
40  
41 443 Research now needs to assess if these changes positively affect older people with frailty, support  
42  
43 444 engagement with CGA that utilises technology, and whether they diminish inequalities in access to  
44  
45 445 technology informed care.

46  
47 446 Qualitative interviews enabled exploration and synthesis of older people and HCPs perspectives.  
48  
49 447 Although we recruited a range of older people and HCPs with a wide variety of views and  
50  
51 448 experiences, our findings may not be transferable to all older people and HCPs who have different  
52  
53  
54  
55  
56  
57  
58  
59  
60

1  
2  
3 449 experiences or perspectives (e.g. we were unable to recruit any social workers despite employing  
4  
5 450 several strategies) (22, 25). However, our theoretically informed qualitative research and  
6  
7 451 stakeholder insights identified both challenges to the current delivery of CGA as well as  
8  
9 452 opportunities for the improvement of CGA for older people with frailty.  
10  
11  
12

## 13 453 **Conclusions**

14  
15  
16 454 We identified four factors to enable implementation of CGA in community: enhancing staff  
17  
18 455 competency in working with older people with frailty, creating interoperable IT-systems, assigning a  
19  
20 456 care coordinator for older people with frailty, and mitigation of the impact of inequalities in access  
21  
22 457 to digital care. Introducing technology and a designated comprehensive care coordinator may be  
23  
24 458 vital to addressing gaps in the current provision of CGA. These solutions may also positively affect  
25  
26 459 the acceptability of CGA in older people with frailty. The next stage of this research will further  
27  
28 460 develop, refine and test a model of improved CGA in community setting.  
29  
30  
31

## 32 461 **Acknowledgements:**

33  
34  
35  
36 462 We would like to thank our public and professional advisory groups who have provided insight and  
37  
38 463 contributed at every stage of the research.  
39  
40  
41

## 42 464 **References**

- 43  
44  
45 465 1. World Health Organisation. Ageing and health [Internet]: WHO; [Available from:  
46 466 <https://www.who.int/news-room/fact-sheets/detail/ageing-and-health>.  
47 467 2. The King's Fund. Long-term conditions and multi-morbidity [Internet]:  
48 468 [www.kingsfund.org.uk](http://www.kingsfund.org.uk); [Available from: [https://www.kingsfund.org.uk/projects/time-think-](https://www.kingsfund.org.uk/projects/time-think-differently/trends-disease-and-disability-long-term-conditions-multi-morbidity)  
49 469 [differently/trends-disease-and-disability-long-term-conditions-multi-morbidity](https://www.kingsfund.org.uk/projects/time-think-differently/trends-disease-and-disability-long-term-conditions-multi-morbidity).  
50 470 3. British Geriatric Society. Joining the dots: A blueprint for preventing and managing frailty in  
51 471 older people. 2023.  
52 472 4. Crocker TF, Brown L, Clegg A, Farley K, Franklin M, Simpkins S, et al. Quality of life is  
53 473 substantially worse for community-dwelling older people living with frailty: systematic review and  
54 474 meta-analysis. *Qual Life Res.* 2019;28(8):2041-56.  
55 475 5. Clegg A, Young J, Iliffe S, Rikkert MO, Rockwood K. Frailty in elderly people. *The Lancet.*  
56 476 2013;381(9868):752-62.  
57  
58  
59  
60

- 1  
2  
3 477 6. Han L, Clegg A, Doran T, Fraser L. The impact of frailty on healthcare resource use: a  
4 478 longitudinal analysis using the Clinical Practice Research Datalink in England. *Age Ageing*.  
5 479 2019;48(5):665-71.  
6  
7 480 7. NHS. The NHS Long Term Plan. 2019.  
8 481 8. Briggs R, McDonough A, Ellis G, Bennett K, O'Neill D, Robinson D. Comprehensive Geriatric  
9 482 Assessment for community-dwelling, high-risk, frail, older people. *Cochrane Database of Systematic*  
10 483 *Reviews*. 2022(5).  
11 484 9. British Geriatric Society. Comprehensive Geriatric Assessment Toolkit for Primary Care  
12 485 Practitioners [Available from: <https://www.bgs.org.uk/cgatoolkit>.  
13 486 10. Sum G, Nicholas SO, Nai ZL, Ding YY, Tan WS. Health outcomes and implementation barriers  
14 487 and facilitators of comprehensive geriatric assessment in community settings: a systematic  
15 488 integrative review [PROSPERO registration no.: CRD42021229953]. *BMC Geriatr*. 2022;22(1):379.  
16 489 11. Ho L, Malden S, McGill K, Shimonovich M, Frost H, Aujla N, et al. Complex interventions for  
17 490 improving independent living and quality of life amongst community-dwelling older adults: a  
18 491 systematic review and meta-analysis. *Age and Ageing*. 2023;52(7):afad132.  
19 492 12. Chadborn NH, Goodman C, Zubair M, Sousa L, Gladman JRF, Dening T, et al. Role of  
20 493 comprehensive geriatric assessment in healthcare of older people in UK care homes: realist review.  
21 494 *BMJ Open*. 2019;9(4):e026921.  
22 495 13. Murphy RP, Dennehy KA, Costello MM, Murphy EP, Judge CS, O'Donnell MJ, et al. Virtual  
23 496 geriatric clinics and the COVID-19 catalyst: a rapid review. *Age Ageing*. 2020;49(6):907-14.  
24 497 14. Nimmons D, Armstrong M, Pigott J, Walters K, Schrag A, Ogunleye D, et al. Exploring the  
25 498 experiences of people and family carers from under-represented groups in self-managing  
26 499 Parkinson's disease and their use of digital health to do this. *DIGITAL HEALTH*.  
27 500 2022;8:20552076221102261.  
28 501 15. Febrey S, Frost J, Hall AJ, Morley N, Whitney J, Johnston V, et al. Advanced practitioners  
29 502 working with older people in primary care and community settings: a cross-sectional, web-based  
30 503 survey of roles and use of technology. *International Journal of Advancing Practice*. 2024;(in press).  
31 504 16. Booth A, Hannes K, Harden A, Noyes J, Harris J, Tong A. COREQ (Consolidated Criteria for  
32 505 Reporting Qualitative Studies). *Guidelines for Reporting Health Research: A User's Manual* 2014. p.  
33 506 214-26.  
34 507 17. Anne H, Lesley B, John Y, Elizabeth T, Rebecca H, Karen S, et al. Community ageing research  
35 508 75+ study (CARE75+): an experimental ageing and frailty research cohort. *BMJ Open*.  
36 509 2019;9(3):e026744.  
37 510 18. Sanchez Santos MT, Williamson E, Bruce J, Ward L, Mallen CD, Garrett A, et al. Cohort  
38 511 profile: Oxford Pain, Activity and Lifestyle (OPAL) Study, a prospective cohort study of older adults in  
39 512 England. *BMJ Open*. 2020;10(9):e037516.  
40 513 19. Clegg A, Relton C, Young J, Witham M. Improving recruitment of older people to clinical  
41 514 trials: use of the cohort multiple randomised controlled trial design. *Age and Ageing*.  
42 515 2015;44(4):547-50.  
43 516 20. Malterud K, Siersma VD, Guassora AD. Sample Size in Qualitative Interview Studies: Guided  
44 517 by Information Power. *Qualitative Health Research*. 2015;26(13):1753-60.  
45 518 21. Hinton L, Ryan S. Interviews. *Qualitative Research in Health Care* 2020. p. 43-55.  
46 519 22. Creswell JW, Poth CN. *Qualitative Inquiry and Research Design: Choosing Among Five*  
47 520 *Approaches*. Thousand Oaks, CA: SAGE Publications Ltd; 2016.  
48 521 23. Greenhalgh T, Maylor H, Shaw S, Wherton J, Papoutsi C, Betton V, et al. The NASSS-CAT  
49 522 Tools for Understanding, Guiding, Monitoring, and Researching Technology Implementation Projects  
50 523 in Health and Social Care: Protocol for an Evaluation Study in Real-World Settings. *JMIR Res Protoc*.  
51 524 2020;9(5):e16861.  
52 525 24. Abimbola S, Patel B, Peiris D, Patel A, Harris M, Usherwood T, et al. The NASSS framework  
53 526 for ex post theorisation of technology-supported change in healthcare: worked example of the  
54 527 TORPEDO programme. *BMC Medicine*. 2019;17(1):233.

- 1  
2  
3 528 25. Mays N, Pope C. Quality in qualitative research. *Qualitative research in health care*.  
4 529 2020;211-33.
- 5 530 26. Timmermans S, Tavory I. Theory Construction in Qualitative Research: From Grounded  
6 531 Theory to Abductive Analysis. *Sociological Theory*. 2012;30(3):167-86.
- 7 532 27. QSR International Pty Ltd. NVivo. 2022.
- 8 533 28. Creswell JW. *Qualitative, quantitative and mixed methods approaches*. Sage; 2014.
- 9 534 29. Shepperd S, Craddock-Bamford A, Butler C, Ellis G, Godfrey M, Gray A, et al. Hospital at  
10 535 Home admission avoidance with comprehensive geriatric assessment to maintain living at home for  
11 536 people aged 65 years and over: a RCT. 2022;10:2.
- 12 537 30. Fereday J, Muir-Cochrane E. Demonstrating Rigor Using Thematic Analysis: A Hybrid  
13 538 Approach of Inductive and Deductive Coding and Theme Development. *International Journal of*  
14 539 *Qualitative Methods*. 2006;5(1):80-92.
- 15 540 31. Sekhon M, Cartwright M, Francis JJ. Acceptability of healthcare interventions: an overview of  
16 541 reviews and development of a theoretical framework. *BMC Health Serv Res*. 2017;17(1):88.
- 17 542 32. Jenkins N, Bloor M, Fischer J, Berney L, Neale J. Putting it in context: the use of vignettes in  
18 543 qualitative interviewing. *Qualitative Research*. 2010;10(2):175-98.
- 19 544 33. Angela Fraser, Lynne Shaw. Enhanced Care of Older People (EnCOP) Competency Framework  
20 545 [Internet]: Frailty icare; [Available from: [https://frailtyicare.org.uk/wp-](https://frailtyicare.org.uk/wp-content/uploads/2022/12/EnCOP-Getting-Started-Core-Slide-Deck.pdf)  
21 546 [content/uploads/2022/12/EnCOP-Getting-Started-Core-Slide-Deck.pdf](https://frailtyicare.org.uk/wp-content/uploads/2022/12/EnCOP-Getting-Started-Core-Slide-Deck.pdf)].
- 22 547 34. Health Education England and NHS England. Frailty; A framework of core capabilities: Skills  
23 548 For Health; 2018 [Available from: [https://www.skillsforhealth.org.uk/wp-](https://www.skillsforhealth.org.uk/wp-content/uploads/2021/01/Frailty-framework.pdf)  
24 549 [content/uploads/2021/01/Frailty-framework.pdf](https://www.skillsforhealth.org.uk/wp-content/uploads/2021/01/Frailty-framework.pdf)].
- 25 550 35. Skills For Health. Frailty Core Capabilities Framework Evaluation: Institute of Ageing and  
26 551 Health; 2019 [Available from:  
27 552 [https://www.skillsforhealth.org.uk/images/services/cstf/SfH%20Frailty%20Framework%20Evaluatio](https://www.skillsforhealth.org.uk/images/services/cstf/SfH%20Frailty%20Framework%20Evaluation%20Report.pdf)  
28 553 [n%20Report.pdf](https://www.skillsforhealth.org.uk/images/services/cstf/SfH%20Frailty%20Framework%20Evaluation%20Report.pdf)].
- 29 554 36. Poupard N, Tang CY, Shields N. Community-based case management does not reduce  
30 555 hospital admissions for older people: a systematic review and meta-analysis. *Aust Health Rev*.  
31 556 2020;44(1):83-92.
- 32 557 37. Improvement Academy and Connected Health Cities. Effectiveness Matters Recognising and  
33 558 managing frailty in primary care: University of York; 2017 [Available from:  
34 559 <https://www.york.ac.uk/media/crd/effectiveness-matters-may-2017-frailty.pdf>].
- 35 560 38. Masoli JAH, Todd O, Burton JK, Wolff C, Walesby KE, Hewitt J, et al. New horizons in the role  
36 561 of digital data in the healthcare of older people. *Age and Ageing*. 2023;52(8).
- 37 562 39. NHS England. Digital transformation. 2023.
- 38 563 40. Yutong T, Yan Z, Qingyun C, Lixue M, Mengke G, Shanshan W. Information and  
39 564 Communication Technology Based Integrated Care for Older Adults: A Scoping Review. *Int J Integr*  
40 565 *Care*. 2023;23(2):2.
- 41 566 41. NHS England. Integrated Care Boards (ICBs) in England. 2022.
- 42 567 42. Western MJ, Armstrong MEG, Islam I, Morgan K, Jones UF, Kelson MJ. The effectiveness of  
43 568 digital interventions for increasing physical activity in individuals of low socioeconomic status: a  
44 569 systematic review and meta-analysis. *Int J Behav Nutr Phys Act*. 2021;18(1):148.
- 45 570 43. Beaunoyer E, Dupéré S, Guitton MJ. COVID-19 and digital inequalities: Reciprocal impacts  
46 571 and mitigation strategies. *Computers in Human Behavior*. 2020;111:106424.
- 47 572 44. Husain L, Greenhalgh T, Hughes G, Finlay T, Wherton J. Desperately Seeking Intersectionality  
48 573 in Digital Health Disparity Research: Narrative Review to Inform a Richer Theorization of Multiple  
49 574 Disadvantage. *J Med Internet Res*. 2022;24(12):e42358.
- 50 575 45. Age UK. Digital inclusion and older people – how have things changed in a Covid-19 world?  
51 576 [Internet]2021 [Available from: [https://www.ageuk.org.uk/globalassets/age-uk/documents/reports-](https://www.ageuk.org.uk/globalassets/age-uk/documents/reports-and-publications/reports-and-briefings/active-communities/digital-inclusion-in-the-pandemic-final-march-2021.pdf)  
52 577 [and-publications/reports-and-briefings/active-communities/digital-inclusion-in-the-pandemic-final-](https://www.ageuk.org.uk/globalassets/age-uk/documents/reports-and-publications/reports-and-briefings/active-communities/digital-inclusion-in-the-pandemic-final-march-2021.pdf)  
53 578 [march-2021.pdf](https://www.ageuk.org.uk/globalassets/age-uk/documents/reports-and-publications/reports-and-briefings/active-communities/digital-inclusion-in-the-pandemic-final-march-2021.pdf)].
- 54  
55  
56  
57  
58  
59  
60

- 1  
2  
3 579 46. Lee P. Mobile Consumer Survey 2018: The UK Cut. Deloitte; 2018.  
4 580 47. Buckingham S, Anil K, Demain S, Gunn H, Jones RB, Kent B, et al. Telerehabilitation for  
5 581 people with physical disabilities and movement impairment: development and evaluation of an  
6 582 online toolkit for practitioners and patients. Disability and Rehabilitation. 2022:1-8.  
7  
8 583  
9

## 10 584 **Authors' Contributions**

11  
12  
13  
14  
15 585 VG and JW conceived the ideas for the research with the help of JF and SL. AM collected the data.  
16  
17 586 AM, JF and VG analysed the data. AM led the writing with the help of JF and VG. NM, HL, SL and SC  
18  
19 587 critically revised the manuscript. All authors and collaborators have approved the final version of the  
20  
21 588 article.  
22  
23

## 24 589 **Funding**

25  
26  
27  
28 590 This project was funded by the National Institute for Health and Care Research (NIHR) under its  
29  
30 591 Programme Development Grants (PDG) Programme (Grant Reference Number NIHR203293). The  
31  
32 592 views expressed are those of the author(s) and not necessarily those of the NIHR or the Department  
33  
34 593 of Health and Social Care.  
35  
36

## 37 594 **Conflict of interests**

38  
39  
40  
41 595 None.  
42  
43

## 44 596 **Ethics approval and consent to participate**

45  
46  
47  
48 597 All the participants gave written informed consent and consent to participate. Ethical approval was  
49  
50 598 issued by the University of Exeter, College of Medicine and Health Research Ethics Committee (Ref  
51  
52 599 509407).  
53  
54  
55  
56  
57  
58  
59  
60

1  
2  
3 **600 Consent for publication**  
4  
5

6  
7 601 The participants gave their consent to participate in the study and to publish anonymised quotes  
8  
9 602 from the interview transcripts. The names of the participants have been anonymised.  
10

11  
12 **603 Availability of data and materials**  
13  
14

15 604 Supplementary data mentioned in the text are available in the additional files.  
16  
17

18 **605 Additional files**  
19  
20

21  
22 606 Additional file 1 contains topic guide for interviews with older people.  
23  
24

25 607 Additional file 2 contains topic guide for interviews with HCPs.  
26  
27  
28  
29  
30  
31  
32  
33  
34  
35  
36  
37  
38  
39  
40  
41  
42  
43  
44  
45  
46  
47  
48  
49  
50  
51  
52  
53  
54  
55  
56  
57  
58  
59  
60



## Topic guide –Older people and carers

1 **Researcher to introduce self, ask why participant interesting in taking part and orientate then as to what they will be**  
 2 **discussing. Reminder re: confidentiality. They can pause, stop, or withdraw at any time.**  
 3

| Topic                                                                                                                                                                                                                                                                                                                                                                                                                                                                                                                                                                                                                                                                                                                                                                                                                                                                                                                                                                                                                                                | Prompts                                                                                                                                                                                                                                                                                                                                |
|------------------------------------------------------------------------------------------------------------------------------------------------------------------------------------------------------------------------------------------------------------------------------------------------------------------------------------------------------------------------------------------------------------------------------------------------------------------------------------------------------------------------------------------------------------------------------------------------------------------------------------------------------------------------------------------------------------------------------------------------------------------------------------------------------------------------------------------------------------------------------------------------------------------------------------------------------------------------------------------------------------------------------------------------------|----------------------------------------------------------------------------------------------------------------------------------------------------------------------------------------------------------------------------------------------------------------------------------------------------------------------------------------|
| <b>Background (NASS Domain Frailty)</b>                                                                                                                                                                                                                                                                                                                                                                                                                                                                                                                                                                                                                                                                                                                                                                                                                                                                                                                                                                                                              |                                                                                                                                                                                                                                                                                                                                        |
| Could you tell me a bit about yourself and what is important to you in your life /lives?                                                                                                                                                                                                                                                                                                                                                                                                                                                                                                                                                                                                                                                                                                                                                                                                                                                                                                                                                             | Who they are? Where they live? What do they do?<br>Support networks                                                                                                                                                                                                                                                                    |
| Does your health or personal situation impact on what is important to you?                                                                                                                                                                                                                                                                                                                                                                                                                                                                                                                                                                                                                                                                                                                                                                                                                                                                                                                                                                           | How? why?)                                                                                                                                                                                                                                                                                                                             |
| <b>Appointments with health and care staff (NASS Domains CGA, Organisation, Intended adopters and Embedding)</b>                                                                                                                                                                                                                                                                                                                                                                                                                                                                                                                                                                                                                                                                                                                                                                                                                                                                                                                                     |                                                                                                                                                                                                                                                                                                                                        |
| Please can you think back to a recent appointment with a health or social care professional (such as a Dr or nurse), and tell me about what happened in that appointment                                                                                                                                                                                                                                                                                                                                                                                                                                                                                                                                                                                                                                                                                                                                                                                                                                                                             | Thinking about things like asking questions, checking your ability to do something, or taking any measurements? Did you get the chance to say anything such as what is important to you                                                                                                                                                |
| What did you think about how that appointment was conducted?                                                                                                                                                                                                                                                                                                                                                                                                                                                                                                                                                                                                                                                                                                                                                                                                                                                                                                                                                                                         | Whether they would have liked anything to have been done differently, or not done at all? what you would have liked to have happened? And why?                                                                                                                                                                                         |
| If an appointment went well, what were the things that were done, that made that a positive experience for you?                                                                                                                                                                                                                                                                                                                                                                                                                                                                                                                                                                                                                                                                                                                                                                                                                                                                                                                                      | Anything that could have been done differently?                                                                                                                                                                                                                                                                                        |
| Are you able to give me any examples of how the pandemic has changed how you engage with health and care staff?                                                                                                                                                                                                                                                                                                                                                                                                                                                                                                                                                                                                                                                                                                                                                                                                                                                                                                                                      | What has worked well for you? What hasn't worked so well?                                                                                                                                                                                                                                                                              |
| <b>Thinking ahead (NASS Domain Technology)</b>                                                                                                                                                                                                                                                                                                                                                                                                                                                                                                                                                                                                                                                                                                                                                                                                                                                                                                                                                                                                       |                                                                                                                                                                                                                                                                                                                                        |
| <p>We are exploring different ways health and care professionals might conduct appointments with older people or find out about a person's health. I am going to ask you your thoughts about different ways they could do this:</p> <ul style="list-style-type: none"> <li>• What do you think about appointments being done remotely; for example by telephone or video?</li> <li>• What do you think about using different ways of sharing information on their current health with staff; for example filling out questionnaires?</li> <li>• What do you think about using equipment that collects information about your health, for example taking your own blood pressure and sending results to your GP?</li> <li>• What do you think about using a mobile phone to share information about how you are doing; for example, a weekly phone check-in with health or care staff?</li> <li>• What do you think about using wearable technology, for example a pedometer or fitbit that collects data about your movement or exercise?</li> </ul> | What informs their thinking, any preferences, concerns or worries? Can you think of any other older people for whom these might not be appropriate, could they make things worse, What sort of problems may pose particular challenges? Could these be helpful or beneficial to older people? What might be needed to use effectively? |
| For those who might struggle with technologies, can you think of ways in which staff can best support them to ensure they can still access to the best possible care? <b>(NASS Domains-Embedding)</b>                                                                                                                                                                                                                                                                                                                                                                                                                                                                                                                                                                                                                                                                                                                                                                                                                                                | Who might struggle?                                                                                                                                                                                                                                                                                                                    |
| If we want to set up a new way of doing appointments using technology, what should we measure to see if the new way works? <b>(NASS Domain-Value Proposition)</b>                                                                                                                                                                                                                                                                                                                                                                                                                                                                                                                                                                                                                                                                                                                                                                                                                                                                                    |                                                                                                                                                                                                                                                                                                                                        |

58 Is there something else that I have not asked you about, that you would like to tell me about your health and healthcare?  
 59  
 60

Thank you.  
 DREAM

## Topic guide –Staff

**Researcher to introduce self, ask why participant interesting in taking part and orientate them as to what they will be discussing. Reminder re: confidentiality. They can pause, stop, or withdraw at any time.**

| Topic                                                                                                                                                                                                                                                                                                                                                                                                                                                                                                                                                                                                                                                                                                                                                                                                                                                                                                                                                                                                                                                                                | Prompts                                                                                                                                                                                                                                                                                                             |
|--------------------------------------------------------------------------------------------------------------------------------------------------------------------------------------------------------------------------------------------------------------------------------------------------------------------------------------------------------------------------------------------------------------------------------------------------------------------------------------------------------------------------------------------------------------------------------------------------------------------------------------------------------------------------------------------------------------------------------------------------------------------------------------------------------------------------------------------------------------------------------------------------------------------------------------------------------------------------------------------------------------------------------------------------------------------------------------|---------------------------------------------------------------------------------------------------------------------------------------------------------------------------------------------------------------------------------------------------------------------------------------------------------------------|
| <b>Background (NASS Domain Frailty and CGA)</b>                                                                                                                                                                                                                                                                                                                                                                                                                                                                                                                                                                                                                                                                                                                                                                                                                                                                                                                                                                                                                                      |                                                                                                                                                                                                                                                                                                                     |
| Please can you tell me a bit about your professional background and current role?                                                                                                                                                                                                                                                                                                                                                                                                                                                                                                                                                                                                                                                                                                                                                                                                                                                                                                                                                                                                    | How long and it what capacity have you been working with older people? Describe the setting you work in.                                                                                                                                                                                                            |
| Please can you tell me a bit about the older people that you work with and the kinds of things that you do with them in consultations                                                                                                                                                                                                                                                                                                                                                                                                                                                                                                                                                                                                                                                                                                                                                                                                                                                                                                                                                | Asking them questions, checking their ability to do something, or taking any measurements?; do you do things differently if they are acutely unwell vs proactive/preventative care; how do you tailor assessments and care to meet individual needs/what is important to them                                       |
| <b>Current assessments (NASS Domains CGA, Organisation, Intended adopters and Embedding)</b>                                                                                                                                                                                                                                                                                                                                                                                                                                                                                                                                                                                                                                                                                                                                                                                                                                                                                                                                                                                         |                                                                                                                                                                                                                                                                                                                     |
| What do you think older people/carers think about what you assess and how you conduct assessments (CGA)                                                                                                                                                                                                                                                                                                                                                                                                                                                                                                                                                                                                                                                                                                                                                                                                                                                                                                                                                                              | Do you think that they might like anything to be done differently, or not done at all?                                                                                                                                                                                                                              |
| If a consultation goes particularly well, what is it that you have done, that might have made that a positive experience for them?                                                                                                                                                                                                                                                                                                                                                                                                                                                                                                                                                                                                                                                                                                                                                                                                                                                                                                                                                   | Is there anything that you might do differently? If yes: can you please describe in what circumstances you might do this? And why?                                                                                                                                                                                  |
| Are you able to give me any examples of how the pandemic has changed how you engage with older people specifically?                                                                                                                                                                                                                                                                                                                                                                                                                                                                                                                                                                                                                                                                                                                                                                                                                                                                                                                                                                  | What has worked well for you? and what hasn't worked so well                                                                                                                                                                                                                                                        |
| <b>Thinking ahead (NASS Domain Technology)</b>                                                                                                                                                                                                                                                                                                                                                                                                                                                                                                                                                                                                                                                                                                                                                                                                                                                                                                                                                                                                                                       |                                                                                                                                                                                                                                                                                                                     |
| Can you think of any ways in which you might be able to undertake more effective assessments with older people?                                                                                                                                                                                                                                                                                                                                                                                                                                                                                                                                                                                                                                                                                                                                                                                                                                                                                                                                                                      | What are they hoping to achieve? What is stopping them?                                                                                                                                                                                                                                                             |
| One way that assessments might be undertaken different, is by them being undertaken remotely or by using different types of technology, and I am going to ask you your thoughts on some examples: <ul style="list-style-type: none"> <li>• What do you think conducting assessments with older people remotely; for example by telephone or video?</li> <li>• What do you think about using different ways that older people might share their information with you; for example filling out questionnaires?</li> <li>• What do you think about using equipment that collects older people's information, for example taking their own blood pressure and sending to you, you will have access to the results?</li> <li>• What do you think about older people using a mobile phone to share information about how they are doing with you; for example, a weekly phone check-in with healthcare staff?</li> <li>• What do you think about older people using wearable technology, for example a pedometer or fitbit that collects data about their movement or exercise?</li> </ul> | Prompt as to what informs their thinking, any preferences, and concerns or challenges eg any people/groups that not appropriate for/make things worse? How do you avoid inequalities in access to care<br><br>When might these be helpful or beneficial to older people? What might they need to engage effectively |
| If we were to evaluate a new intervention for older people or, what do you think that we should measure to see if it works? <b>(NASS Domain-Value Proposition)</b>                                                                                                                                                                                                                                                                                                                                                                                                                                                                                                                                                                                                                                                                                                                                                                                                                                                                                                                   | How could we measure the impact of a new intervention?                                                                                                                                                                                                                                                              |

Is there something else that I have not asked you about, that you would like to tell me about?

**Thank you**

## COREQ (COnsolidated criteria for REporting Qualitative research) Checklist

A checklist of items that should be included in reports of qualitative research. You must report the page number in your manuscript where you consider each of the items listed in this checklist. If you have not included this information, either revise your manuscript accordingly before submitting or note N/A.

| Topic                                          | Item No. | Guide Questions/Description                                                                                                                              | Reported on Section/Page No.                              |
|------------------------------------------------|----------|----------------------------------------------------------------------------------------------------------------------------------------------------------|-----------------------------------------------------------|
| <b>Domain 1: Research team and reflexivity</b> |          |                                                                                                                                                          |                                                           |
| <i>Personal characteristics</i>                |          |                                                                                                                                                          |                                                           |
| Interviewer/facilitator                        | 1        | Which author/s conducted the interview or focus group?                                                                                                   | Methods/Design/ P4                                        |
| Credentials                                    | 2        | What were the researcher's credentials? E.g. PhD, MD                                                                                                     | Methods/Design/P4                                         |
| Occupation                                     | 3        | What was their occupation at the time of the study?                                                                                                      | Methods/Design/P4-5                                       |
| Gender                                         | 4        | Was the researcher male or female?                                                                                                                       | Methods/Design/P4                                         |
| Experience and training                        | 5        | What experience or training did the researcher have?                                                                                                     | Methods/Design/ P4-5                                      |
| <i>Relationship with participants</i>          |          |                                                                                                                                                          |                                                           |
| Relationship established                       | 6        | Was a relationship established prior to study commencement?                                                                                              | Methods/Data collection / P6                              |
| Participant knowledge of the interviewer       | 7        | What did the participants know about the researcher? e.g. personal goals, reasons for doing the research                                                 | Methods/Data collection / P6 and additional files 1 and 2 |
| Interviewer characteristics                    | 8        | What characteristics were reported about the interviewer/facilitator? e.g. Bias, assumptions, reasons and interests in the research topic                | Methods/Design/ P4                                        |
| <b>Domain 2: Study design</b>                  |          |                                                                                                                                                          |                                                           |
| <i>Theoretical framework</i>                   |          |                                                                                                                                                          |                                                           |
| Methodological orientation and Theory          | 9        | What methodological orientation was stated to underpin the study? e.g. grounded theory, discourse analysis, ethnography, phenomenology, content analysis | Methods/ Data collection and Data analysis/ P6, P7        |
| <i>Participant selection</i>                   |          |                                                                                                                                                          |                                                           |
| Sampling                                       | 10       | How were participants selected? e.g. purposive, convenience, consecutive, snowball                                                                       | Methods/Sampling and recruitment/ P5                      |
| Method of approach                             | 11       | How were participants approached? e.g. face-to-face, telephone, mail, email                                                                              | Methods/Sampling and recruitment/ P5                      |
| Sample size                                    | 12       | How many participants were in the study?                                                                                                                 | Results/older people and Healthcare professionals/ P7-9   |
| Non-participation                              | 13       | How many people refused to participate or dropped out? Reasons?                                                                                          | Methods/Sampling and recruitment/ P5                      |
| <i>Setting</i>                                 |          |                                                                                                                                                          |                                                           |
| Setting of data collection                     | 14       | Where was the data collected? e.g. home, clinic, workplace                                                                                               | Methods/Data collection/ P6                               |
| Presence of nonparticipants                    | 15       | Was anyone else present besides the participants and researchers?                                                                                        | Results/older people/ P7                                  |

|    |                                        |                 |                                                                                                                                    |                                                         |
|----|----------------------------------------|-----------------|------------------------------------------------------------------------------------------------------------------------------------|---------------------------------------------------------|
| 1  | Description of sample                  | 16              | What are the important characteristics of the sample? e.g. demographic data, date                                                  | Results/older people and Healthcare professionals/ P7-9 |
| 2  |                                        |                 |                                                                                                                                    |                                                         |
| 3  |                                        |                 |                                                                                                                                    |                                                         |
| 4  | <i>Data collection</i>                 |                 |                                                                                                                                    |                                                         |
| 5  | Interview guide                        | 17              | Were questions, prompts, guides provided by the authors? Was it pilot tested?                                                      | Methods/ Data collection/ P6                            |
| 6  |                                        |                 |                                                                                                                                    |                                                         |
| 7  | Repeat interviews                      | 18              | Were repeat inter views carried out? If yes, how many?                                                                             | NA                                                      |
| 8  |                                        |                 |                                                                                                                                    |                                                         |
| 9  | Audio/visual recording                 | 19              | Did the research use audio or visual recording to collect the data?                                                                | Methods/ Data collection/ P6                            |
| 10 |                                        |                 |                                                                                                                                    |                                                         |
| 11 | Field notes                            | 20              | Were field notes made during and/or after the inter view or focus group?                                                           | Methods/ Data collection/ P6                            |
| 12 |                                        |                 |                                                                                                                                    |                                                         |
| 13 | Duration                               | 21              | What was the duration of the inter views or focus group?                                                                           | Results/older people and Healthcare professionals/ P7-9 |
| 14 |                                        |                 |                                                                                                                                    |                                                         |
| 15 | Data saturation                        | 22              | Was data saturation discussed?                                                                                                     | Methods/Sampling and recruitment/ P5                    |
| 16 |                                        |                 |                                                                                                                                    |                                                         |
| 17 | Transcripts returned                   | 23              | Were transcripts returned to participants for comment and/or                                                                       | NA                                                      |
| 18 |                                        |                 |                                                                                                                                    |                                                         |
| 19 | <b>Topic</b>                           | <b>Item No.</b> | <b>Guide Questions/Description</b>                                                                                                 | <b>Reported on Page No.</b>                             |
| 20 |                                        |                 | correction?                                                                                                                        | NA                                                      |
| 21 |                                        |                 |                                                                                                                                    |                                                         |
| 22 |                                        |                 |                                                                                                                                    |                                                         |
| 23 |                                        |                 |                                                                                                                                    |                                                         |
| 24 |                                        |                 |                                                                                                                                    |                                                         |
| 25 | <b>Domain 3: analysis and findings</b> |                 |                                                                                                                                    |                                                         |
| 26 |                                        |                 |                                                                                                                                    |                                                         |
| 27 | <i>Data analysis</i>                   |                 |                                                                                                                                    |                                                         |
| 28 |                                        |                 |                                                                                                                                    |                                                         |
| 29 | Number of data coders                  | 24              | How many data coders coded the data?                                                                                               | Methods/ Data analysis/ P7                              |
| 30 |                                        |                 |                                                                                                                                    |                                                         |
| 31 | Description of the coding tree         | 25              | Did authors provide a description of the coding tree?                                                                              | Methods/ Data analysis/ P7                              |
| 32 |                                        |                 |                                                                                                                                    |                                                         |
| 33 | Derivation of themes                   | 26              | Were themes identified in advance or derived from the data?                                                                        | Methods/ Data analysis/ P7                              |
| 34 |                                        |                 |                                                                                                                                    |                                                         |
| 35 | Software                               | 27              | What software, if applicable, was used to manage the data?                                                                         | Methods/ Data analysis/ P7                              |
| 36 |                                        |                 |                                                                                                                                    |                                                         |
| 37 | Participant checking                   | 28              | Did participants provide feedback on the findings?                                                                                 | NA                                                      |
| 38 |                                        |                 |                                                                                                                                    |                                                         |
| 39 |                                        |                 |                                                                                                                                    |                                                         |
| 40 | <i>Reporting</i>                       |                 |                                                                                                                                    |                                                         |
| 41 | Quotations presented                   | 29              | Were participant quotations presented to illustrate the themes/findings?<br>Was each quotation identified? e.g. participant number | Results/ P9-16                                          |
| 42 |                                        |                 |                                                                                                                                    |                                                         |
| 43 | Data and findings consistent           | 30              | Was there consistency between the data presented and the findings?                                                                 | Results/ P9-16 and Discussion/ P16-20                   |
| 44 |                                        |                 |                                                                                                                                    |                                                         |
| 45 | Clarity of major themes                | 31              | Were major themes clearly presented in the findings?                                                                               | Results/ P9-16                                          |
| 46 |                                        |                 |                                                                                                                                    |                                                         |
| 47 | Clarity of minor themes                | 32              | Is there a description of diverse cases or discussion of minor themes?                                                             | Results/ P9-16                                          |
| 48 |                                        |                 |                                                                                                                                    |                                                         |
| 49 |                                        |                 |                                                                                                                                    |                                                         |
| 50 |                                        |                 |                                                                                                                                    |                                                         |

Developed from: Tong A, Sainsbury P, Craig J. Consolidated criteria for reporting qualitative research (COREQ): a 32-item checklist for interviews and focus groups. *International Journal for Quality in Health Care*. 2007. Volume 19, Number 6: pp. 349 – 357

**Once you have completed this checklist, please save a copy and upload it as part of your submission. DO NOT include this checklist as part of the main manuscript document. It must be uploaded as a separate file.**

# BMJ Open

## How can we improve Comprehensive Geriatric Assessment for older people living with frailty in primary care and community settings? A Qualitative Study

|                                 |                                                                                                                                                                                                                                                                                                                                                                                                                                                                                                                                                                                                                                                                                                                                                                                |
|---------------------------------|--------------------------------------------------------------------------------------------------------------------------------------------------------------------------------------------------------------------------------------------------------------------------------------------------------------------------------------------------------------------------------------------------------------------------------------------------------------------------------------------------------------------------------------------------------------------------------------------------------------------------------------------------------------------------------------------------------------------------------------------------------------------------------|
| Journal:                        | <i>BMJ Open</i>                                                                                                                                                                                                                                                                                                                                                                                                                                                                                                                                                                                                                                                                                                                                                                |
| Manuscript ID                   | bmjopen-2023-081304.R2                                                                                                                                                                                                                                                                                                                                                                                                                                                                                                                                                                                                                                                                                                                                                         |
| Article Type:                   | Original research                                                                                                                                                                                                                                                                                                                                                                                                                                                                                                                                                                                                                                                                                                                                                              |
| Date Submitted by the Author:   | 06-Mar-2024                                                                                                                                                                                                                                                                                                                                                                                                                                                                                                                                                                                                                                                                                                                                                                    |
| Complete List of Authors:       | Mahmoud, Aseel; University of Exeter, Faculty of Health and Life Sciences<br>Goodwin, Victoria; University of Exeter, PenCLAHRC<br>Morley, Naomi; University of Exeter, Faculty of Health and Life Sciences<br>Whitney, Julie ; King's College London, Life Sciences and Medicine<br>Lamb, Sarah; University of Exeter, Faculty of Health and Life Sciences<br>Lyndon, Helen; Cornwall Partnership NHS Foundation Trust, Adult Community Services Specialist Services Directorate; University of Plymouth, Southwest Clinical School<br>Creanor, Siobhan; University of Exeter, Faculty of Health and Life Sciences<br>Frost, Julia; University of Exeter, Faculty of Health and Life Sciences<br>DREAM, Study Team; University of Exeter, Faculty of Health and Life Sciences |
| <b>Primary Subject Heading</b>: | Geriatric medicine                                                                                                                                                                                                                                                                                                                                                                                                                                                                                                                                                                                                                                                                                                                                                             |
| Secondary Subject Heading:      | Health services research, Qualitative research                                                                                                                                                                                                                                                                                                                                                                                                                                                                                                                                                                                                                                                                                                                                 |
| Keywords:                       | QUALITATIVE RESEARCH, GERIATRIC MEDICINE, Aging, Frailty                                                                                                                                                                                                                                                                                                                                                                                                                                                                                                                                                                                                                                                                                                                       |
|                                 |                                                                                                                                                                                                                                                                                                                                                                                                                                                                                                                                                                                                                                                                                                                                                                                |

SCHOLARONE™  
Manuscripts



I, the Submitting Author has the right to grant and does grant on behalf of all authors of the Work (as defined in the below author licence), an exclusive licence and/or a non-exclusive licence for contributions from authors who are: i) UK Crown employees; ii) where BMJ has agreed a CC-BY licence shall apply, and/or iii) in accordance with the terms applicable for US Federal Government officers or employees acting as part of their official duties; on a worldwide, perpetual, irrevocable, royalty-free basis to BMJ Publishing Group Ltd ("BMJ") its licensees and where the relevant Journal is co-owned by BMJ to the co-owners of the Journal, to publish the Work in this journal and any other BMJ products and to exploit all rights, as set out in our [licence](#).

The Submitting Author accepts and understands that any supply made under these terms is made by BMJ to the Submitting Author unless you are acting as an employee on behalf of your employer or a postgraduate student of an affiliated institution which is paying any applicable article publishing charge ("APC") for Open Access articles. Where the Submitting Author wishes to make the Work available on an Open Access basis (and intends to pay the relevant APC), the terms of reuse of such Open Access shall be governed by a Creative Commons licence – details of these licences and which [Creative Commons](#) licence will apply to this Work are set out in our licence referred to above.

Other than as permitted in any relevant BMJ Author's Self Archiving Policies, I confirm this Work has not been accepted for publication elsewhere, is not being considered for publication elsewhere and does not duplicate material already published. I confirm all authors consent to publication of this Work and authorise the granting of this licence.

1  
2  
3  
4 1 **How can we improve Comprehensive Geriatric Assessment for older people living**  
5  
6 2 **with frailty in primary care and community settings? A Qualitative Study**  
7  
8

9  
10 3 Aseel Mahmoud<sup>1</sup>, \*Victoria A Goodwin<sup>1</sup>, Naomi Morley<sup>1</sup>, Julie Whitney<sup>2</sup>, Sarah E Lamb<sup>1</sup>, Helen  
11  
12 4 Lyndon<sup>3,4</sup>, Siobhan Creanor<sup>1</sup>, Julia Frost<sup>1</sup> on behalf of the DREAM Study Team  
13

14  
15 5 <sup>1</sup>Faculty of Health and Life Sciences, University of Exeter  
16

17  
18 6 <sup>2</sup>Life Sciences and Medicine, King's College London  
19

20  
21 7 <sup>3</sup>Cornwall Foundation NHS Trust, Adult Community Services Specialist Services Directorate  
22

23  
24 8 <sup>4</sup>University of Plymouth, Southwest Clinical School  
25

26  
27 9 \*Address correspondence to: Professor Victoria Goodwin, Faculty of Health and Life Sciences,  
28  
29 10 University of Exeter, UK Email: [v.goodwin@exeter.ac.uk](mailto:v.goodwin@exeter.ac.uk)  
30

31  
32 11 **Abstract**  
33

34  
35 12 **Objective**  
36

37 13 With advancing age comes the increasing prevalence of frailty and increased risk of adverse  
38  
39 14 outcomes (e.g. hospitalisation). Evidence for Comprehensive Geriatric Assessment (CGA), a multi-  
40  
41 15 dimensional holistic model of care, is mixed in community settings. Uncertainties remain, such as the  
42  
43 16 key components of CGA, who delivers it, and the use of technology. This study aimed to understand  
44  
45 17 the perspectives, beliefs and experiences, of both older people and health professionals, to improve  
46  
47 18 the current CGA, and explore factors that may impact on CGA delivery in community settings.  
48  
49

50  
51 19 **Design**  
52

53  
54 20 A qualitative interview study was conducted with older people and health care professionals  
55  
56 21 identified using a maximum variation strategy. Data were analysed using an abductive analysis  
57  
58 22 approach. The Non-adoption, Abandonment, Scale-up, Spread and Sustainability (NASSS) framework  
59  
60

23 and the Theoretical Framework of Acceptability guided the categorisation of the codes, and  
24 identified categories were mapped to the two frameworks.

## 25 **Setting**

26 England, United Kingdom

## 27 **Results**

28 Twenty-seven people were interviewed, constituting 14 older people and 13 healthcare  
29 professionals (HCPs). We identified limitations in the current CGA: a lack of information sharing  
30 between different healthcare professionals who deliver CGA; poor communication between older  
31 people and their HCPs; and a lack of follow-up as part of CGA. When we discussed the potential for  
32 CGA to utilise technology, HCPs and older people varied in their readiness to engage with it.

## 33 **Conclusions**

34 Viable solutions to address gaps in the current delivery of CGA include the provision of training and  
35 support to use digital technology and a designated comprehensive care coordinator. The next stage  
36 of this research will use these findings, existing evidence and stakeholder engagement, to develop  
37 and refine a model of community based CGA that can be assessed for feasibility and acceptability.

## 38 **Keywords**

39 Ageing, comprehensive geriatric assessment, digital technology, frailty, qualitative.

## 40 **Strengths and Limitations**

- 41 • Use of qualitative interviews enabled rich data on exploration and synthesis of older people  
42 and healthcare professionals.
- 43 • Our theoretically informed qualitative research and stakeholder insights identified both  
44 challenges to the current delivery of CGA as well as opportunities for the improvement of  
45 CGA for older people with frailty.



- 1  
2  
3 46       • Our study is deliberately exploratory; thus the findings may not be transferable to other  
4  
5 47           older people and healthcare professionals. However, we recruited older people and HCPs  
6  
7 48           with a wide variety of views and experiences.  
8  
9

## 10 49 **Introduction**

11  
12  
13  
14 50   Between 2020 and 2050 the number of people worldwide aged over 80 will triple to reach 26 million  
15  
16 51   (1). With ageing, people are more susceptible to develop multiple, long-term conditions that reduce  
17  
18 52   their independence and quality of life (1-4). This is due to underlying factors, such as falls, frailty, and  
19  
20 53   delirium (1, 3).

21  
22  
23  
24 54   Frailty is a clinical syndrome where multiple body systems deteriorate leading to increased  
25  
26 55   vulnerability (3, 5). Frailty increases the risk of falls, disability, hospitalisation, mortality, and contact  
27  
28 56   with healthcare services (5, 6). Prevention and reversal of frailty can enable people to stay well and  
29  
30 57   live independently for longer (3). Frailty affects half of the UK population aged over 85 and costs the  
31  
32 58   publicly funded National Health Service (NHS) £5.8 billion per year (6). A key priority of the NHS in  
33  
34 59   the UK is to support older people with frailty to manage their long-term conditions (3, 7).

35  
36  
37  
38 60   Older people living with frailty need robust interventions tailored to the complexity of their care  
39  
40 61   needs (3, 8). Comprehensive Geriatric Assessment (CGA) is a multi-dimensional diagnostic and  
41  
42 62   therapeutic intervention that includes an assessment of physical, cognitive and psychosocial  
43  
44 63   components with the development of a holistic management plan in partnership with the older  
45  
46 64   person with frailty (8). CGA delivered in acute, primary and community settings aims to prevent  
47  
48 65   deterioration and complications associated with frailty (3, 9). However, the effectiveness of CGA for  
49  
50 66   older people with frailty in primary care and community settings is mixed (8, 10, 11). Ho et al  
51  
52 67   reported benefits in terms of the likelihood of living at home, reduced mortality, improved cognition,  
53  
54 68   and activities of daily living, but with uncertain benefits on quality of life (11), whereas Briggs and  
55  
56 69   colleagues found no difference in mortality, activities of daily living, quality of life and care home  
57  
58  
59  
60

1  
2  
3 70 admissions (8). Descriptions of CGA components often lack detail, including the delineation of staff  
4  
5 71 involved in delivery, and an understanding about factors that affect implementation are limited (12).  
6  
7  
8 72 Recent NHS initiatives to strengthen the efficiency of outpatient services using alternative  
9  
10 73 approaches require consideration. For example, there is growing interest in the use of wearable  
11  
12 74 devices to monitor patients (7). The NHS Long Term Plan, and Digital Transformation Plan,  
13  
14 75 recommend the use of digital equipment in the assessment and monitoring of older people with  
15  
16 76 frailty; with the option of using wearable devices to ensure services are inclusive and available to all  
17  
18 77 (7, 12). However, digital technologies are not part of the existing evidence for CGA.  
19  
20  
21  
22 78 Regardless of the complexity and diversity of the needs of older people with frailty, some face  
23  
24 79 inequities in access to interventions which may help to maintain or improve their independence (3).  
25  
26 80 For example, whilst telemedicine can be beneficial, cost-effective and acceptable to older people (13),  
27  
28 81 there are concerns about digital exclusion (14) and risks that important signs and symptoms could be  
29  
30 82 missed (15). Improving the effectiveness and efficiency of CGA (11) requires exploration of how  
31  
32 83 individual components may work and how the overall intervention can be enhanced. The Digital and  
33  
34 84 Remote Enhancement for the Assessment and Management of Older People with Frailty (DREAM)  
35  
36 85 project aimed to develop a community-based model of CGA that incorporated technology. This  
37  
38 86 qualitative study aimed to understand perspectives, beliefs and experiences of both actual and  
39  
40 87 potential providers and users to improve the current CGA and explore the factors that may impact  
41  
42 88 on CGA delivery in community settings, including the use of technology.  
43  
44  
45  
46  
47

## 48 **Methods**

### 51 **Design**

52  
53 91 A qualitative interview study with older people and health care professionals was conducted. AM, a  
54  
55 92 female post-doctoral research fellow and pharmacist, collected and analysed the data in  
56  
57 93 collaboration with VG (a female academic physiotherapist) and JF (a female medical sociologist). All  
58  
59  
60

1  
2  
3 94 had experience of conducting qualitative research. Ethical approval was issued by the University of  
4  
5 95 Exeter, College of Medicine and Health Research Ethics Committee (Ref 509407). The study has been  
6  
7 96 reported according to the Consolidated Criteria for Reporting Qualitative Study (COREQ) guidelines  
8  
9 97 (16).

### 98 **Patient and Public Engagement**

99 Patient Public Involvement and Engagement (PPIE) and Health and Care Professional (HCP) advisory  
100 groups contributed to the development, design and conduct of this research through a series of  
101 workshops. They contributed to developing and piloting topic guides for the interviews and provided  
102 analytical insight into preliminary findings through discussions.

### 103 **Sampling and Recruitment**

#### 104 *Older people*

105 Participants were recruited from the Community Ageing Research (CARE) 75+ (17) or the Oxford Pain  
106 Activity and Lifestyle (OPAL) (18) cohorts. Both CARE75+ and OPAL are representative, prospective  
107 longitudinal studies designed as both epidemiological studies of older people living in the  
108 community in the UK and as recruitment platforms to help overcome some of the challenges of  
109 older people being under-represented in research (19). We applied a maximum variation sampling  
110 strategy to identify Care75+ and OPAL participants who had consented to be contacted, to capture  
111 diversity in gender, ethnicity, living circumstances, socioeconomic factors, geography, frailty, sensory  
112 (e.g. visual or hearing problems), and memory problems. Frailty for the CARE 75+ Cohort was  
113 assessed using the Edmonton Frailty Index (20) and the Electronic Frailty Index (19) and for the OPAL  
114 cohort was assessed using Tilburg Frailty Indicator (21). Batches of invitations to participate were  
115 sent out to 15-20 people at a time by AM (for Care75+ participants) and the OPAL research team (for  
116 OPAL participants). In total, 132 invitations were sent out. We continued recruiting from May 2022  
117 to December 202 until our concurrent analysis yielded an in-depth understanding of where and how  
118 CGA might be improved. (22)

1  
2  
3 119 *Healthcare Professionals*  
4  
5

6 120 For healthcare professionals, we also used a maximum variation sampling strategy (23), to ensure  
7  
8 121 representation of professional background, geographical location, and gender. We invited health  
9  
10 122 and social care professionals working in non-hospital settings in the UK working with older people  
11  
12 123 living with frailty via social media (Twitter and Facebook) and via professional networks.  
13  
14

15 124 All older people and healthcare professionals who expressed an interest in taking part were  
16  
17 125 recruited.  
18  
19

20  
21 126 **Data collection**  
22

23 127 We developed semi-structured topic guides (23, 24) for older people (Additional file 1) and HCPs  
24  
25 128 (Additional file 2) based on a review of literature and online workshop discussions with our two  
26  
27 129 advisory groups made up of older people, family members, and HCPs. We did not use the term CGA  
28  
29 130 in the interviews with older people as advised by the two advisory groups. Topic domains were  
30  
31 131 aligned to the Non-adoption, Abandonment, Scale up, Spread and Sustainability (NASSS) framework  
32  
33 132 to ensure collection of rich data and to explicitly focus our analysis on how best to improve CGA (25).  
34  
35 133 The NASSS framework has previously been used to explain the interacting factors that affect the  
36  
37 134 implementation of complex interventions that utilise technology and generate mixed outcomes (25,  
38  
39 135 26). AM piloted the topic guide with members of the PPIE advisory group and refined one question  
40  
41 136 (concerning outcomes to be measured) for clarity. The topic guide enabled consistency in the data  
42  
43 137 collection, with the interviews flexible enough to allow the participants to explain what was  
44  
45 138 important to them (27). The interviews were conducted face-to-face, via telephone or video call,  
46  
47 139 depending on the participants' preference (23). AM introduced herself and explained the aim of the  
48  
49 140 study to the interviewee at the beginning of each interview. The audio-recorded interviews were  
50  
51 141 transcribed by a GDPR compliant transcriber and checked for accuracy by AM. Fieldnotes captured  
52  
53 142 the context of the interview. AM had no previous contact with any of the participants.  
54  
55  
56  
57  
58  
59  
60

## 143 **Data analysis**

144 We undertook abductive analysis (28), and used NVivo 13 (Release 1.7) (29) to manage the data. This  
145 involved an iterative approach to analysis, to facilitate understanding (27, 30). We coded the  
146 interviews in cycles, with deductive codes from the literature and inductive codes generated by AM,  
147 identifying similar ideas or concepts that could be categorised into a code (27, 31). This enabled  
148 balance between data relating to pre-existing concepts and data based on the perspectives of the  
149 participants (28, 32). We (AM, VG and JF) then developed a conceptual map of the different  
150 participants' perspectives (24). The NASSS framework, and the Theoretical Framework of  
151 Acceptability (25, 33) guided the categorisation of the codes. The categories were then mapped to  
152 the two frameworks, which enabled further elaboration of the complexity within the domains of an  
153 intended CGA intervention that utilises technology. For example, the broad analytical category  
154 'Organisation' was constituted by various coding categories, including person-centred and accessible  
155 records, digital enabling for staff, information sharing between HCPs and continuity of care. We used  
156 a conceptual map to create a hypothetical case (vignette) of an older person who participated in a  
157 CGA that used technology (34). We used the vignette in the final three interviews with HCPs, to  
158 extend our understanding of the potential afforded by technology. Preliminary findings were  
159 presented to the advisory groups for discussion and consideration of their interpretations.

## 160 **Results**

### 161 **Older people**

162 Fourteen older people consented to participate and were interviewed. Respondents were aged  
163 between 75 and 90 years old, were evenly split between males and females, and included  
164 participants with hearing and/or visual impairment, mobility impairments, and with one or more  
165 long term condition. One participant asked to be interviewed in the presence of their carer (a  
166 spouse). The interviews lasted between 16 and 92 minutes. (Table 1).

167 *Table 1 Demographic characteristics of older people with frailty*

| Participant Pseudonym | Gender | Age group | Current residence in England | Living circumstances | Mode of interview   |
|-----------------------|--------|-----------|------------------------------|----------------------|---------------------|
| Robert                | Male   | 81-85     | North East                   | Live alone           | Telephone interview |
| James                 | Male   | 81-85     | South West                   | Live alone           | In-person interview |
| Richard               | Male   | 81-85     | South West                   | Live with spouse     | Online audio call   |
| William               | Male   | 86-90     | North East                   | Live with spouse     | Online video call   |
| Barbara               | Female | 81-85     | North East                   | Live with spouse     | Telephone interview |
| Gary                  | Male   | 75-80     | North East                   | Live with spouse     | Telephone interview |
| Karen                 | Female | 75-80     | South East                   | Live alone           | Online video call   |
| Steven                | Male   | 75-80     | South East                   | Live with spouse     | Telephone interview |
| Shirley               | Female | 75-80     | Midlands                     | Live alone           | Telephone interview |
| Frances               | Female | 86-90     | South East                   | Live alone           | Telephone interview |
| Carol                 | Female | 81-85     | North West                   | Live alone           | Telephone interview |
| Donna                 | Female | 81-85     | South East                   | Live alone           | Telephone interview |
| Frank                 | Male   | 75-80     | Midlands                     | Live with spouse     | Telephone interview |
| Lois                  | Female | 86-90     | South West                   | Live with spouse     | Telephone interview |

168

### 169 Healthcare professionals

170 The thirteen HCPs came from different professional backgrounds, and from different geographical  
 171 areas of England. All of the participants were working, or had worked, with older people with frailty,  
 172 for a duration of two to 30 years (Table 2). The interview duration ranged between 33 and 160  
 173 minutes.

174 *Table 2 Demographic characteristics for HCPs who participated in the study*

| Participant number | Profession                     | Years of providing care to older people | Location in England | Gender | Mode of interview |
|--------------------|--------------------------------|-----------------------------------------|---------------------|--------|-------------------|
| HP1                | Frailty assistant practitioner | 20                                      | South West          | Female | Online            |
| HP2                | Nurse                          | 15                                      | South West          | Male   | Online            |
| HP3                | GP                             | Retired                                 | North East          | Female | Online            |

|      |                         |    |            |        |        |
|------|-------------------------|----|------------|--------|--------|
| HP4  | Physiotherapist         | 19 | South West | Female | Online |
| HP5  | GP                      | 16 | South West | Female | Online |
| HP6  | Physiotherapist         | 30 | South West | Female | Online |
| HP7  | Nurse                   | 15 | South West | Female | Online |
| HP8  | Nurse                   | 2  | South East | Female | Online |
| HP9  | Occupational therapist  | 10 | South East | Female | Online |
| HP10 | Consultant Geriatrician | 23 | North West | Male   | Online |
| HP11 | Consultant Geriatrician | 19 | Midlands   | Female | Online |
| HP12 | Physiotherapist         | 4  | Midlands   | Female | Online |
| HP13 | Pharmacist              | 3  | North West | Female | Online |

175

176 We identified patterns about the conditions to enhance CGA across the two data sets, then classified  
 177 these patterns into the eight domains of the NASSS framework and to the Framework of  
 178 Acceptability (25, 33). Here we present the four domains that were most important for both the  
 179 patient and professional participants: frailty (the condition), intended adopters (both professional  
 180 and lay), organisational factors (such as workforce challenges), and acceptability (of technology and  
 181 assessment).

### 182 **Frailty**

183 Amongst HCPs, there was an appreciation of the complexity of frailty. Regardless of whether they  
 184 have a need for acute care or not, all older people with frailty have complex needs due to having  
 185 multiple long-term conditions, impairments and/or socioeconomic factors:

---

186 *“Most of them are aged 80 almost all of them are frail and so they have multiple chronic*  
 187 *conditions, they have got polypharmacy they tend to need some help with one or more*  
 188 *activities of daily living”.* (HP13, Pharmacist)

---

1  
2  
3 189 HCPs from different professions tend to provide a comprehensive assessment that involves physical,  
4  
5 190 psychological and social needs for older people with acute and non-acute care needs. However,  
6  
7 191 there is a need to provide older frail people with assessment prior to a crisis developing:  
8  
9  
10

---

11  
12 192 *“All the domains yeah, the psychological, physical all those you know functional,*  
13 *environmental you know do you live in a house, a flat, bungalow, do you sleep upstairs, any*  
14 *falls you know any equipment in the toilet, that kind of thing and social you know do you*  
15 *get out.” (HP12, Physiotherapist)*  
16

17  
18 196 *“So, if you’re trying to keep somebody weller for longer, then any of those proactive*  
19 *interventions rather than waiting until they get to crisis point.” (HP9, Occupational*  
20 *therapist)*  
21  
22

---

23  
24 199 We interviewed older people with frailty who were socioeconomically disadvantaged and/or  
25  
26 200 experienced sensory or physical impairment that can exacerbate the complexity of their care needs.  
27  
28 201 For example, Carol had financial challenges, restricted mobility, visual impairment, multiple long-  
29  
30 202 term conditions, and a high risk of falling. Carol had limited choices in access to care, because of her  
31  
32 203 restricted ability to travel to appointments, lack of a support network, and no access to technology:  
33  
34  
35

---

36  
37 204 *“I’ve been a single person all my life and I get the basic state pension. So, I’ve never ever*  
38 *been able to afford the technology that people use every day to day in these days and*  
39 *that’s the reason I don’t have it.” (Carol, 81-85 years old)*  
40  
41

---

42  
43 207 On the other hand, Karen lived alone, but has regular communication with family and friends. During  
44  
45 208 her health and care journey, Karen was able to enact her own health decisions and avoided long NHS  
46  
47 209 waiting time for tests and referrals:  
48  
49  
50

---

51  
52 210 *“I only saw the consultant yesterday, so the next steps haven’t been put in place yet.*  
53 *Unfortunately, I have had to pay privately for it and the NHS seems to be in such a mess*  
54 *and the doctor did want to send me off for tests but she couldn’t justify so, more or less*  
55 *saying well you know it is as it is we can’t do anything more for you because we haven’t got*  
56 *proof that this test or that test is something we can do, something we can justify. [...] I’ll*  
57 *have to pay for that privately otherwise I will just be waiting too long. You know I am*  
58  
59  
60



216 *getting on I don't want the last two or three years probably of my life to be sitting around*  
 217 *at home feeling sorry for myself." (Karen, 75-80 years old)*

---

## 218 **Intended adopters**

219 Some HCPs indicated that an HCPs occupational background may inform the scope of assessment  
 220 during the CGA, and the quality of the CGA that they offer. A nurse who led a frailty team showed  
 221 appreciation of the range of HCP backgrounds in their team, which enabled them to involve the  
 222 most suitable HCP (e.g. in terms of their skill set), to meet the unique needs of the older person:

---

223 *"obviously if it was things like their ability to perform their physical activity to daily living*  
 224 *that maybe something that I would involve one of, I've got a colleague who is Band 4*  
 225 *assistant practitioner whose got a therapy background she's very good at looking at the*  
 226 *nuts and bolts of how people physically manage [...] I will also do joint visits with OTs and*  
 227 *physios if we're feeling that we need to, that there's a, that the referral makes it sound like*  
 228 *this is very much that mixed picture of it's not just a medical requirement or a strict nursing*  
 229 *requirement that there's an overlap with where my therapy colleagues would come in".*  
 230 *(HP2, Nurse)*

---

231 This contrasted consultant geriatrician (HP11) who also led a frailty team. HP11 indicated that  
 232 regardless of the different backgrounds of HCPs in their team, there should be no differences in the  
 233 CGA that they provide to older people with frailty. However, HP11 highlighted that some professions  
 234 may have limited ability to understand the complexity of older people's care needs. This was  
 235 congruent with the views from older people who thought that their care needs could be managed  
 236 better by an HCP with knowledge and experience of older people with frailty:

---

237 *"They all do the same because they've all had their advanced [...], course the advanced*  
 238 *assessment healthcare assessment course. They've all done the same course ok,". (HP11,*  
 239 *Consultant Geriatrician)*

240 *"You could have one doctor who is in the practice who specialised in old people you know*  
 241 *just for the aged to sort of he specialised in the aged. [...] where old people could feel they*  
 242 *could go [...] rather than a general practitioner maybe somebody that was for the old and*  
 243 *the frail." (Barbara, 81-85 years old)*

---

1  
2  
3 244 A GP (HP3) thought that the ability to deliver CGA depends upon the investigative and  
4  
5 245 communication skills, and previous experience of staff, and it is not restricted to a particular  
6  
7 246 background:  
8  
9  
10

---

11  
12 247 *“So, I tend to work on a concept that I don’t like thinking about professions doing things I*  
13 248 *like to think about competencies.” (HP3, GP)*  
14  
15

---

16  
17 249 Some HCPs suggested that HCPs may require training to improve interpersonal skills, in terms of  
18  
19 250 communication and attention to detail, to ensure enhancement of CGA. For example, HP12 (a  
20  
21 251 Physiotherapist) shared their personal experience of developing their investigational skills when  
22  
23 252 providing remote CGA over time. HP7 (a Nurse) shared their experience of supporting new HCPs in  
24  
25 253 their team to learn how to pick-up non-verbal cues during home visits, to support identifying care  
26  
27 254 needs and provide CGA.  
28  
29

### 30 255 **Organisation**

31  
32  
33 256 Interviewing HCPs from different geographical areas of England allowed us to explore organisational  
34  
35 257 limitations, which would require innovation to increase readiness for new forms of technology-  
36  
37 258 informed care delivery.  
38  
39

40  
41 259 Some HCPs made references to fear and resistance to trying new ways of care delivery. For example,  
42  
43 260 a nurse (HP2) referred to themselves as ‘a dinosaur’ when it comes to trying new technologies.  
44  
45 261 Similarly, a frailty assistant practitioner (HP1) also indicated that practitioners may need support  
46  
47 262 from colleagues, while a consultant geriatrician (HP11) shared the challenges they had when using  
48  
49 263 technology and the time needed for training to use new technology:  
50  
51

52  
53  
54 264 *“There’s also the training aspect of it. Training takes a long time you go in and sit down and*  
55 265 *have training whatever new technology comes you have to find time to go for training and*  
56 266 *you actually don’t get to understand its use until you start using it and the problems that*  
57 267 *you get when you start using it”.* (HP11, Consultant Geriatrician)  
58  
59

---

1  
2  
3 268 Almost all HCPs discussed the negative impact of using different clinical databases in various settings  
4  
5 269 on their ability to share and/or access patients' records. HCPs discussed the importance of having a  
6  
7 270 well-established information sharing process between HCPs in different settings in enhancement of  
8  
9  
10 271 CGA. HCPs shared their experiences of meeting the challenges in information sharing. For example,  
11  
12 272 sharing data in regular Multi-Disciplinary Team (MDT) meetings, provides access to the GP medical  
13  
14 273 records for HCPs who work in the community, which enables them to effectively support the older  
15  
16 274 people with whom they work. Some organisations have a sharing document that all HCPs involved in  
17  
18  
19 275 CGA can use to input and share data, which staff found beneficial in terms of the availability of  
20  
21 276 information and efficiency in obtaining key information when needed:  
22  
23  
24

---

25  
26 277 *"I've not seen they've had a CGA, their clinical frailty scale is this, blah, blah, blah never*  
27 278 *seen it never ever. Never ever, ever seen it. So, information is not coming it is not flowing".*  
28 279 *(HP12, Physiotherapist)*

29  
30  
31 280 *"I just from previous experience I knew these sorts of things I needed to have so I made*  
32 281 *sure that I discussed it with the CCG and got them to put this in place because I didn't want*  
33 282 *to be spending exactly like the nurse, two hours, trying to get information when in five*  
34 283 *minutes I can have that information."* (HP10, Consultant Geriatrician)

35  
36  
37 284 *"So, for me to be able to know what medicines somebody is on, I have to have access to*  
38 285 *that or I've got ask somebody who has access to check for me ok".* (HP11, Consultant  
39 286 *Geriatrician)*

---

40  
41  
42 287 Lack of staff capacity was perceived as a limitation for delivering CGA by all HCPs, which may inhibit  
43  
44 288 delivery of timely support which an older people may require. Some older people recognised the  
45  
46 289 limited staff availability and the increasing demands on the GP practices that inhibit continuity in  
47  
48  
49 290 care. For them, lack of continuity decreases their engagement with their care:  
50  
51  
52

---

53  
54 291 *"More of us, more availability [...] I mean we are running its sort of like a virtual ward model*  
55 292 *but it's going to be, we have less staff on at a weekend. So, our capacity to take new*  
56 293 *referrals on a Friday and over the weekend is a lot less."* (HP9, Occupational therapist)  
57  
58  
59  
60

---

294 *“When you see the doctor, you know you barely it’s a locum that I see I don’t see my own*  
295 *doctor.” (Shirley, 75-80 years old)*

---

296 Other older people with frailty understood the current workforce challenges in the NHS and  
297 suggested that improved communication between HCPs and sharing information may mitigate the  
298 current lack of continuity:

---

299 *“GPs talk to each other and that you know if you go in and you see somebody who is not*  
300 *your designated GP you know that fine well that the notes are there [...]. So, you feel*  
301 *perfectly happy that you know whoever you are seeing, knows what they are talking*  
302 *about.” (Lois, 86-90 years old)*

---

303 However, we identified that when an older person can identify a key contact person to support  
304 them, this can mitigate a lack of continuity in their care, because they key person can co-ordinate  
305 their care and ensure the continuous flow of communication:

---

306 *“So, I sort of stayed involved in this case as a coordinating factor because you know it*  
307 *happens when too many people are involved things the outcome might not be good or the*  
308 *people can get lost in translation and so I managed to speak to the mental health team and*  
309 *everything and draw all the people that the GP had referred to, to a point where I said now,*  
310 *you need to take this forward.” (HP12, Physiotherapist)*

---

### 311 **Acceptability**

312 We identified elements that might influence acceptability by older people with frailty, that should be  
313 taken into consideration when enhancing CGA.

314 Although HCPs perceived that older people were satisfied with CGA and the care provided to them,  
315 some older people indicated that they could not freely communicate with HCPs and express their  
316 needs, because of perceived short appointments with their GP. Furthermore, older people lacked  
317 trust in their HCPs, or the clinical decisions made about their treatment plan:

1  
2  
3  
4 318 *"I would say the consistent feedback is normally that they're greatly relieved that we've*  
5 319 *given the time 'cos we don't time specify our visits" (HP2, Nurse)*

6  
7  
8 320 *"No, it's so quick and it's so, I mean in person, well I wouldn't say personal you know when*  
9 321 *you speak to a doctor like I did with my old doctor if he, it was just a different attitude*  
10 322 *towards you, it's like a conveyor belt, you come in, you go out, you come in and you go out*  
11 323 *so, you know you just feel it's not the same what it was before." (Shirley, 75-80 years old)*

12  
13  
14 324 Moreover, HCPs acknowledged the variation in older people readiness to engage with new ways of  
15  
16 325 care delivery:

17  
18  
19  
20  
21 326 *"There is a high risk of inequalities because anytime you are going introduce something*  
22 327 *different new, there are going to be people who can use it very easily and there are going*  
23 328 *to be those who can't for whatever reasons". (HP13, Pharmacist)*

24  
25  
26  
27 329 This aligned with the findings from interviews with the older people themselves. For example, Karen  
28  
29 330 showed readiness to engage with new ways of receiving technology-informed care because she had  
30  
31 331 previous experience of using technology in her healthcare, and in communication with family  
32  
33 332 members. In contrast, Shirley rejected engagement with new forms of remote appointments:

34  
35  
36  
37  
38 333 *"They did ask me once yes, but I said, well, I don't know how to do it, let's put it that way a*  
39 334 *video appointment I mean I don't [...] I have a mobile phone so, you know I just don't know*  
40 335 *how to do it. So, the other solution was that they speak to me over the phone". (Shirley, 75-*  
41 336 *80 years old)*

42  
43  
44  
45 337 Lack of physical access to technology (e.g. a device or internet connection) can inhibit an older  
46  
47 338 person's opportunity to learn how to use technology, which may subsequently limit their readiness  
48  
49 339 to engage with new forms of technology informed care. Therefore, those with frailty may require  
50  
51 340 additional support to engage with CGA that utilises technology. For example, older people with  
52  
53 341 sensory impairment may require specialist adaptation to their device, or support from a carer to  
54  
55 342 engage; whereas older people who are already digitally literate may only need educational input on  
56  
57 343 how to use a new technology.  
58  
59  
60

1  
2  
3 344 HCPs recognised the variation in the needs and preferences of older people with frailty and  
4  
5 345 discussed how they tailor CGA to the person's needs:  
6  
7  
8

---

9  
10 346 *"I would say we're able to be very person-centred we're not looking at things from a*  
11 347 *clinician's perspective only we will explore things from the patient's perspective in terms of*  
12 348 *what they think is their problems."* (HP4, Physiotherapist)  
13

---

14  
15 349 Some HCPs thought that the presence of a carer, a family member or support network may increase  
16 350 a frail older person's acceptance of CGA that utilises technology. However, HCPs acknowledged the  
17  
18 351 higher demands on the carer which may reduce the support they can provide, to help the older adult  
19  
20 352 engage with technology. A GP (HP3) shared examples of caregivers who inadvertently disempower  
21  
22 353 the older person, in terms of decision-making about their healthcare choices. Older people may  
23  
24 354 therefore require support from a wider network, and not only their carer:  
25  
26  
27  
28  
29

---

30  
31 355 *"Some of them have families who help them but they still like you know eye contact,*  
32 356 *physical contact and the written word, you know paper, hard copy of anything. So, I am*  
33 357 *afraid that's something that they'll eventually all pop off but and thankfully the younger*  
34 358 *ones are you know quite capable of using all these devices."* (Barbara, 81-85 years old)  
35  
36

---

37  
38 359 HCPs may not be able to provide the required follow-up after an assessment, important for tracking  
39  
40 360 the referrals to other services if needed and the management plan provided to the patient. Similarly,  
41  
42 361 older people explained the challenges that they were facing in following-up the HCPs; for example,  
43  
44 362 to find out the result of a test, or to book an appointment:  
45  
46  
47

---

48  
49 363 *"I would like to think we're good at going out and identifying the problem we're good at*  
50 364 *negotiating a management plan with someone it's then how do you monitor the effect of*  
51 365 *that management plan"*. (HP2, Nurse)  
52  
53

54 366 *"I had to phone my practice after I'd been to see the 111 doctor and she said get in touch*  
55 367 *with your practice and I got this sort of non-committal reply oh, well you'd better start your*  
56 368 *antibiotics and I was quite disappointed that they didn't get in touch with me because*  
57 369 *they'd given me that advice without having seen a report and I thought well I would have*  
58  
59  
60

1  
2  
3 370 *expected something to come back but like I said, I was really not well enough to do*  
4 371 *anything about it". (Donna, 81-85 years old)*  
5  
6  
7

---

## 8 372 **Discussion**

9  
10  
11 373 This study explored the factors that may impact on CGA delivery in community settings, including  
12  
13 374 the use of technology. This research adds to the current growing evidence on challenges on  
14  
15 375 delivering effective CGA in community settings and identified factors to enhance CGA in community  
16  
17 376 settings from the perspectives of older people and HCPs.

18  
19  
20  
21 377 In this study, we identified key challenges to the enhancement of CGA in the community, including:  
22  
23 378 information sharing between different HCPs who are delivering the CGA; communication between  
24  
25 379 older people and their HCPs; and follow-up appointments after conducting the CGA. From the  
26  
27 380 current challenges that were explained by participants, and suggestions which they made to address  
28  
29 381 them, workshop discussions with advisory group members and existing literature, we identified  
30  
31 382 factors to enhance CGA in the community.

32  
33  
34  
35 383 Both HCPs and older people considered that the delivery of CGA should not be limited to those from  
36  
37 384 specific professions but should be based upon HCPs competency and knowledge of the complexity of  
38  
39 385 need for older people with frailty. This finding aligns with the Ageing Well Network of Enhanced Care  
40  
41 386 for older People (EnCOP) competency framework (35); an aim of which is to enhance staff  
42  
43 387 competency in working anywhere in the care system (35). The Health Education England and NHS  
44  
45 388 England commissioned the Frailty Core Capabilities Framework in 2018 to identify skills and  
46  
47 389 behaviours required to deliver high quality of care to older people with frailty (36). However, there is  
48  
49 390 limited use of the framework in commissioning education or training, reflected in the results of  
50  
51 391 evaluation surveys that were conducted in 2018 and 2019 (37). We suggest that upskilling staff and  
52  
53 392 providing them with appropriate training to improve their communication and investigation skills  
54  
55 393 may be a viable solution to mitigate the negative impact of workforce shortages on the effectiveness  
56  
57 394 of CGA.  
58  
59  
60

1  
2  
3 395 From conducting interviews augmented by workshop discussions with advisory group members, we  
4  
5 396 identified the need for assigning a member of staff or MDT team to a co-ordinating role, which we  
6  
7 397 designated as “Comprehensive Care Coordinator”. This person could coordinate the delivery of CGA  
8  
9  
10 398 by facilitating information sharing between different HCPs, communicating with older people with  
11  
12 399 frailty on a regular basis, and ensuring that the management plan including referrals is acted upon.  
13  
14 400 Designating a care coordinator may improve continuity of care with one point of contact and provide  
15  
16 401 reassurance through a therapeutic, long-term relationship. This may provide reassurance to the  
17  
18 402 older person and ensure effective follow-up of any management plan. Care coordinator roles in the  
19  
20 403 community, including case managers, may reduce emergencies. However, evidence shows variation  
21  
22 404 in the role in different studies in terms of duration and frequency of home visits and HCPs who  
23  
24 405 coordinated the care (11, 38, 39). Further research needs to identify who could best coordinate care  
25  
26 406 in older people and what the best approach may be.  
27  
28  
29  
30 407 Moreover, HCPs agreed that utilising technology in the delivery of CGA may enable HCPs to provide  
31  
32 408 support for older people without compromising their follow-up. The NHS plan highlighted the need  
33  
34 409 for enhancing the use of technology in healthcare, to change how care is being provided to patients;  
35  
36 410 and to create joined up computer systems that give staff sufficient access to data, to provide  
37  
38 411 improved care for patients (7). However, there is a need for digital upskilling of staff to support their  
39  
40 412 effective use of technology in healthcare (40).  
41  
42  
43  
44 413 Different IT-systems and a lack of information governance arrangements across different settings  
45  
46 414 currently inhibits information sharing and creates tension between HCPs in different settings. HCPs  
47  
48 415 told us that the lack of connection between different systems must be addressed, if they are to  
49  
50 416 deliver an effective CGA. Similarly, older people mentioned how lack of access to information  
51  
52 417 magnified unequal access to effective CGA, and support and care for older people with frailty. In  
53  
54 418 February 2023, NHS Digital became responsible for digital technology, data and health and care  
55  
56 419 delivery. This has the potential to address some of the challenges in information sharing (41).  
57  
58  
59  
60



1  
2  
3 420 Existing research has identified the need for convenient platforms and improved digital records for  
4  
5 421 integrated care services for older people (including CGA) that maintain privacy and security when  
6  
7 422 sharing patient data between MDTs (40, 42). Such integrated platforms may enhance  
8  
9 423 communication and coordination of care (40, 42). However, resolving existing operational  
10  
11 424 complexities is likely to require additional funding and the creation of interoperable IT-systems (7,  
12  
13 425 40, 41, 43).

14  
15  
16  
17 426 We found that socioeconomic factors, including living circumstances, income, and social network  
18  
19 427 impacted older peoples' treatment choices; in terms of whether they visited a clinical specialist and  
20  
21 428 waiting times for NHS appointments. This implies that when developing the CGA that utilises  
22  
23 429 technology we need to consider how to mitigate socioeconomic factors that inhibit access and  
24  
25 430 capacity to obtain the benefits of using digital equipment in the assessment and follow-up. Existing  
26  
27 431 research suggests that digital interventions are less effective in populations with socioeconomic  
28  
29 432 disadvantage compared with those with higher socioeconomic status (44). Although the COVID 19  
30  
31 433 pandemic accelerated the shift to online resources and services, and changed patient perceptions  
32  
33 434 and willingness to use technology, it increased digital inequalities (45, 46). Amongst those aged 75  
34  
35 435 and over in the UK, 42% do not use the internet, reporting a lack of digital skills as the main  
36  
37 436 reason (47). However, the older population is changing, and the next generation of older people are  
38  
39 437 more familiar with using technology, with 77% of those aged over 55 using a smart phone (48) and  
40  
41 438 55% of those aged 50-64 using the internet most days (47). However, increasing physical access to  
42  
43 439 connected devices and the internet alone may not be enough to reduce inequalities in access to CGA  
44  
45 440 that utilises technology (44, 45, 49). Therefore, training and support would be needed to ensure  
46  
47 441 older people could be digitally enabled; however, this may not be appropriate for everyone, and  
48  
49 442 support would need to be individualised (47).

50  
51  
52  
53  
54  
55  
56 443 Using technology for monitoring and supporting older people with frailty is an NHS priority, and over  
57  
58 444 time there may be more opportunities for older people with frailty to access and use technology (7).  
59  
60

1  
2  
3 445 Research now needs to assess if these changes positively affect older people with frailty, support  
4  
5 446 engagement with CGA that utilises technology, and whether they diminish inequalities in access to  
6  
7 447 technology informed care.  
8  
9

10 448 Qualitative interviews enabled exploration and synthesis of older people and HCPs perspectives.  
11  
12 449 Although we recruited a range of older people and HCPs with a wide variety of views and  
13  
14 450 experiences, our findings may not be transferable to all older people and HCPs who have different  
15  
16 451 experiences or perspectives (e.g. we were unable to recruit any social workers despite employing  
17  
18 452 several strategies) (24, 27). However, our theoretically informed qualitative research and  
19  
20 453 stakeholder insights identified both challenges to the current delivery of CGA as well as  
21  
22 454 opportunities for the improvement of CGA for older people with frailty.  
23  
24  
25

## 26 455 **Conclusions**

27  
28  
29  
30 456 We identified four factors to enable implementation of CGA in community: enhancing staff  
31  
32 457 competency in working with older people with frailty, creating interoperable IT-systems, assigning a  
33  
34 458 care coordinator for older people with frailty, and mitigation of the impact of inequalities in access  
35  
36 459 to digital care. Introducing technology and a designated comprehensive care coordinator may be  
37  
38 460 vital to addressing gaps in the current provision of CGA. These solutions may also positively affect  
39  
40 461 the acceptability of CGA in older people with frailty. The next stage of this research will further  
41  
42 462 develop, refine and test a model of improved CGA in community setting.  
43  
44  
45

## 46 463 **Acknowledgements:**

47  
48  
49  
50 464 We would like to thank our public and professional advisory groups who have provided insight and  
51  
52 465 contributed at every stage of the research.  
53  
54  
55  
56  
57  
58  
59  
60

466 **References**

- 467 1. World Health Organisation. Ageing and health [Internet]: WHO; [Available from:  
468 <https://www.who.int/news-room/fact-sheets/detail/ageing-and-health>.
- 469 2. The King's Fund. Long-term conditions and multi-morbidity [Internet]:  
470 [www.kingsfund.org.uk](http://www.kingsfund.org.uk); [Available from: [https://www.kingsfund.org.uk/projects/time-think-](https://www.kingsfund.org.uk/projects/time-think-differently/trends-disease-and-disability-long-term-conditions-multi-morbidity)  
471 [differently/trends-disease-and-disability-long-term-conditions-multi-morbidity](https://www.kingsfund.org.uk/projects/time-think-differently/trends-disease-and-disability-long-term-conditions-multi-morbidity).
- 472 3. British Geriatric Society. Joining the dots: A blueprint for preventing and managing frailty in  
473 older people. 2023.
- 474 4. Crocker TF, Brown L, Clegg A, Farley K, Franklin M, Simpkins S, et al. Quality of life is  
475 substantially worse for community-dwelling older people living with frailty: systematic review and  
476 meta-analysis. *Qual Life Res.* 2019;28(8):2041-56.
- 477 5. Clegg A, Young J, Iliffe S, Rikkert MO, Rockwood K. Frailty in elderly people. *The Lancet.*  
478 2013;381(9868):752-62.
- 479 6. Han L, Clegg A, Doran T, Fraser L. The impact of frailty on healthcare resource use: a  
480 longitudinal analysis using the Clinical Practice Research Datalink in England. *Age Ageing.*  
481 2019;48(5):665-71.
- 482 7. NHS. The NHS Long Term Plan. 2019.
- 483 8. Briggs R, McDonough A, Ellis G, Bennett K, O'Neill D, Robinson D. Comprehensive Geriatric  
484 Assessment for community-dwelling, high-risk, frail, older people. *Cochrane Database of Systematic*  
485 *Reviews.* 2022(5).
- 486 9. British Geriatric Society. Comprehensive Geriatric Assessment Toolkit for Primary Care  
487 Practitioners [Available from: <https://www.bgs.org.uk/cgatoolkit>.
- 488 10. Sum G, Nicholas SO, Nai ZL, Ding YY, Tan WS. Health outcomes and implementation barriers  
489 and facilitators of comprehensive geriatric assessment in community settings: a systematic  
490 integrative review [PROSPERO registration no.: CRD42021229953]. *BMC Geriatr.* 2022;22(1):379.
- 491 11. Ho L, Malden S, McGill K, Shimonovich M, Frost H, Aujla N, et al. Complex interventions for  
492 improving independent living and quality of life amongst community-dwelling older adults: a  
493 systematic review and meta-analysis. *Age and Ageing.* 2023;52(7):afad132.
- 494 12. Chadborn NH, Goodman C, Zubair M, Sousa L, Gladman JRF, Denning T, et al. Role of  
495 comprehensive geriatric assessment in healthcare of older people in UK care homes: realist review.  
496 *BMJ Open.* 2019;9(4):e026921.
- 497 13. Murphy RP, Dennehy KA, Costello MM, Murphy EP, Judge CS, O'Donnell MJ, et al. Virtual  
498 geriatric clinics and the COVID-19 catalyst: a rapid review. *Age Ageing.* 2020;49(6):907-14.
- 499 14. Nimmons D, Armstrong M, Pigott J, Walters K, Schrag A, Ogunleye D, et al. Exploring the  
500 experiences of people and family carers from under-represented groups in self-managing  
501 Parkinson's disease and their use of digital health to do this. *DIGITAL HEALTH.*  
502 2022;8:20552076221102261.
- 503 15. Febrey S, Frost J, Hall AJ, Morley N, Whitney J, Johnston V, et al. Advanced practitioners  
504 working with older people in primary care and community settings: a cross-sectional, web-based  
505 survey of roles and use of technology. *International Journal of Advancing Practice.* 2024;(in press).
- 506 16. Booth A, Hannes K, Harden A, Noyes J, Harris J, Tong A. COREQ (Consolidated Criteria for  
507 Reporting Qualitative Studies). *Guidelines for Reporting Health Research: A User's Manual* 2014. p.  
508 214-26.
- 509 17. Anne H, Lesley B, John Y, Elizabeth T, Rebecca H, Karen S, et al. Community ageing research  
510 75+ study (CARE75+): an experimental ageing and frailty research cohort. *BMJ Open.*  
511 2019;9(3):e026744.
- 512 18. Sanchez Santos MT, Williamson E, Bruce J, Ward L, Mallen CD, Garrett A, et al. Cohort  
513 profile: Oxford Pain, Activity and Lifestyle (OPAL) Study, a prospective cohort study of older adults in  
514 England. *BMJ Open.* 2020;10(9):e037516.

- 1  
2  
3 515 19. Clegg A, Relton C, Young J, Witham M. Improving recruitment of older people to clinical  
4 516 trials: use of the cohort multiple randomised controlled trial design. *Age and Ageing*.  
5 517 2015;44(4):547-50.  
6 518 20. Rolfson DB, Majumdar SR, Tsuyuki RT, Tahir A, Rockwood K. Validity and reliability of the  
7 519 Edmonton Frail Scale. *Age and Ageing*. 2006;35(5):526-9.  
8 520 21. Gobbens RJ, van Assen MA, Luijckx KG, Wijnen-Sponselee MT, Schols JM. The Tilburg Frailty  
9 521 Indicator: psychometric properties. *J Am Med Dir Assoc*. 2010;11(5):344-55.  
10 522 22. Malterud K, Siersma VD, Guassora AD. Sample Size in Qualitative Interview Studies: Guided  
11 523 by Information Power. *Qualitative Health Research*. 2015;26(13):1753-60.  
12 524 23. Hinton L, Ryan S. Interviews. *Qualitative Research in Health Care* 2020. p. 43-55.  
13 525 24. Creswell JW, Poth CN. *Qualitative Inquiry and Research Design: Choosing Among Five*  
14 526 *Approaches*. Thousand Oaks, CA: SAGE Publications Ltd; 2016.  
15 527 25. Greenhalgh T, Maylor H, Shaw S, Wherton J, Papoutsi C, Betton V, et al. The NASSS-CAT  
16 528 Tools for Understanding, Guiding, Monitoring, and Researching Technology Implementation Projects  
17 529 in Health and Social Care: Protocol for an Evaluation Study in Real-World Settings. *JMIR Res Protoc*.  
18 530 2020;9(5):e16861.  
19 531 26. Abimbola S, Patel B, Peiris D, Patel A, Harris M, Usherwood T, et al. The NASSS framework  
20 532 for ex post theorisation of technology-supported change in healthcare: worked example of the  
21 533 TORPEDO programme. *BMC Medicine*. 2019;17(1):233.  
22 534 27. Mays N, Pope C. Quality in qualitative research. *Qualitative research in health care*.  
23 535 2020:211-33.  
24 536 28. Timmermans S, Tavory I. Theory Construction in Qualitative Research: From Grounded  
25 537 Theory to Abductive Analysis. *Sociological Theory*. 2012;30(3):167-86.  
26 538 29. QSR International Pty Ltd. NVivo. 2022.  
27 539 30. Creswell JW. *Qualitative, quantitative and mixed methods approaches*. Sage; 2014.  
28 540 31. Shepperd S, Craddock-Bamford A, Butler C, Ellis G, Godfrey M, Gray A, et al. Hospital at  
29 541 Home admission avoidance with comprehensive geriatric assessment to maintain living at home for  
30 542 people aged 65 years and over: a RCT. 2022;10:2.  
31 543 32. Fereday J, Muir-Cochrane E. Demonstrating Rigor Using Thematic Analysis: A Hybrid  
32 544 Approach of Inductive and Deductive Coding and Theme Development. *International Journal of*  
33 545 *Qualitative Methods*. 2006;5(1):80-92.  
34 546 33. Sekhon M, Cartwright M, Francis JJ. Acceptability of healthcare interventions: an overview of  
35 547 reviews and development of a theoretical framework. *BMC Health Serv Res*. 2017;17(1):88.  
36 548 34. Jenkins N, Bloor M, Fischer J, Berney L, Neale J. Putting it in context: the use of vignettes in  
37 549 qualitative interviewing. *Qualitative Research*. 2010;10(2):175-98.  
38 550 35. Angela Fraser, Lynne Shaw. Enhanced Care of Older People (EnCOP) Competency Framework  
39 551 [Internet]: Frailty icare; [Available from: [https://frailtyicare.org.uk/wp-](https://frailtyicare.org.uk/wp-content/uploads/2022/12/EnCOP-Getting-Started-Core-Slide-Deck.pdf)  
40 552 [content/uploads/2022/12/EnCOP-Getting-Started-Core-Slide-Deck.pdf](https://frailtyicare.org.uk/wp-content/uploads/2022/12/EnCOP-Getting-Started-Core-Slide-Deck.pdf).  
41 553 36. Health Education England and NHS England. Frailty; A framework of core capabilities: Skills  
42 554 For Health; 2018 [Available from: [https://www.skillsforhealth.org.uk/wp-](https://www.skillsforhealth.org.uk/wp-content/uploads/2021/01/Frailty-framework.pdf)  
43 555 [content/uploads/2021/01/Frailty-framework.pdf](https://www.skillsforhealth.org.uk/wp-content/uploads/2021/01/Frailty-framework.pdf).  
44 556 37. Skills For Health. Frailty Core Capabilities Framework Evaluation: Institute of Ageing and  
45 557 Health; 2019 [Available from:  
46 558 [https://www.skillsforhealth.org.uk/images/services/cstf/SfH%20Frailty%20Framework%20Evaluatio](https://www.skillsforhealth.org.uk/images/services/cstf/SfH%20Frailty%20Framework%20Evaluation%20Report.pdf)  
47 559 [n%20Report.pdf](https://www.skillsforhealth.org.uk/images/services/cstf/SfH%20Frailty%20Framework%20Evaluation%20Report.pdf).  
48 560 38. Poupard N, Tang CY, Shields N. Community-based case management does not reduce  
49 561 hospital admissions for older people: a systematic review and meta-analysis. *Aust Health Rev*.  
50 562 2020;44(1):83-92.  
51 563 39. Improvement Academy and Connected Health Cities. Effectiveness Matters Recognising and  
52 564 managing frailty in primary care: University of York; 2017 [Available from:  
53 565 <https://www.york.ac.uk/media/crd/effectiveness-matters-may-2017-frailty.pdf>.

- 1  
2  
3 566 40. Masoli JAH, Todd O, Burton JK, Wolff C, Walesby KE, Hewitt J, et al. New horizons in the role  
4 567 of digital data in the healthcare of older people. *Age and Ageing*. 2023;52(8).  
5 568 41. NHS England. Digital transformation. 2023.  
6 569 42. Yutong T, Yan Z, Qingyun C, Lixue M, Mengke G, Shanshan W. Information and  
7 570 Communication Technology Based Integrated Care for Older Adults: A Scoping Review. *Int J Integr*  
8 571 *Care*. 2023;23(2):2.  
9 572 43. NHS England. Integrated Care Boards (ICBs) in England. 2022.  
10 573 44. Western MJ, Armstrong MEG, Islam I, Morgan K, Jones UF, Kelson MJ. The effectiveness of  
11 574 digital interventions for increasing physical activity in individuals of low socioeconomic status: a  
12 575 systematic review and meta-analysis. *Int J Behav Nutr Phys Act*. 2021;18(1):148.  
13 576 45. Beaunoyer E, Dupéré S, Guitton MJ. COVID-19 and digital inequalities: Reciprocal impacts  
14 577 and mitigation strategies. *Computers in Human Behavior*. 2020;111:106424.  
15 578 46. Husain L, Greenhalgh T, Hughes G, Finlay T, Wherton J. Desperately Seeking Intersectionality  
16 579 in Digital Health Disparity Research: Narrative Review to Inform a Richer Theorization of Multiple  
17 580 Disadvantage. *J Med Internet Res*. 2022;24(12):e42358.  
18 581 47. Age UK. Digital inclusion and older people – how have things changed in a Covid-19 world?  
19 582 [Internet]2021 [Available from: [https://www.ageuk.org.uk/globalassets/age-uk/documents/reports-](https://www.ageuk.org.uk/globalassets/age-uk/documents/reports-and-publications/reports-and-briefings/active-communities/digital-inclusion-in-the-pandemic-final-march-2021.pdf)  
20 583 [and-publications/reports-and-briefings/active-communities/digital-inclusion-in-the-pandemic-final-](https://www.ageuk.org.uk/globalassets/age-uk/documents/reports-and-publications/reports-and-briefings/active-communities/digital-inclusion-in-the-pandemic-final-march-2021.pdf)  
21 584 [march-2021.pdf](https://www.ageuk.org.uk/globalassets/age-uk/documents/reports-and-publications/reports-and-briefings/active-communities/digital-inclusion-in-the-pandemic-final-march-2021.pdf).  
22 585 48. Lee P. Mobile Consumer Survey 2018: The UK Cut. Deloitte; 2018.  
23 586 49. Buckingham S, Anil K, Demain S, Gunn H, Jones RB, Kent B, et al. Telerehabilitation for  
24 587 people with physical disabilities and movement impairment: development and evaluation of an  
25 588 online toolkit for practitioners and patients. *Disability and Rehabilitation*. 2022:1-8.  
26  
27  
28  
29  
30 589

## 590 **Authors' Contributions**

31  
32  
33  
34  
35  
36 591 VG and JW conceived the ideas for the research with the help of JF and SL. AM collected the data.  
37  
38 592 AM, JF and VG analysed the data. AM led the writing with the help of JF and VG. NM, HL, SL and SC  
39  
40 593 critically revised the manuscript. All authors have approved the final version of the article.  
41  
42

## 594 **Funding**

43  
44  
45  
46  
47 595 This project was funded by the National Institute for Health and Care Research (NIHR) under its  
48  
49 596 Programme Development Grants (PDG) Programme (Grant Reference Number NIHR203293). The  
50  
51 597 views expressed are those of the author(s) and not necessarily those of the NIHR or the Department  
52  
53 598 of Health and Social Care.  
54  
55  
56  
57  
58  
59  
60

1  
2  
3 599 **Conflict of interests**  
4  
5

6  
7 600 None.  
8  
9

10 601 **Ethics approval and consent to participate**  
11  
12

13 602 All the participants gave written informed consent and consent to participate. Ethical approval was  
14  
15 603 issued by the University of Exeter, College of Medicine and Health Research Ethics Committee (Ref  
16  
17 604 509407).  
18  
19

20  
21 605 **Consent for publication**  
22  
23

24 606 The participants gave their consent to participate in the study and to publish anonymised quotes  
25  
26 607 from the interview transcripts. The names of the participants have been anonymised.  
27  
28

29 608 **Availability of data and materials**  
30  
31

32  
33 609 Supplementary data mentioned in the text are available in the additional files.  
34  
35

36 610 **Additional files**  
37  
38

39  
40 611 Additional file 1 contains topic guide for interviews with older people.  
41  
42

43 612 Additional file 2 contains topic guide for interviews with HCPs.  
44  
45  
46  
47  
48  
49  
50  
51  
52  
53  
54  
55  
56  
57  
58  
59  
60

## Topic guide –Older people and carers

1 **Researcher to introduce self, ask why participant interesting in taking part and orientate then as to what they will be**  
 2 **discussing. Reminder re: confidentiality. They can pause, stop, or withdraw at any time.**  
 3

| Topic                                                                                                                                                                                                                                                                                                                                                                                                                                                                                                                                                                                                                                                                                                                                                                                                                                                                                                                                                                                                                                                | Prompts                                                                                                                                                                                                                                                                                                                                |
|------------------------------------------------------------------------------------------------------------------------------------------------------------------------------------------------------------------------------------------------------------------------------------------------------------------------------------------------------------------------------------------------------------------------------------------------------------------------------------------------------------------------------------------------------------------------------------------------------------------------------------------------------------------------------------------------------------------------------------------------------------------------------------------------------------------------------------------------------------------------------------------------------------------------------------------------------------------------------------------------------------------------------------------------------|----------------------------------------------------------------------------------------------------------------------------------------------------------------------------------------------------------------------------------------------------------------------------------------------------------------------------------------|
| <b>Background (NASS Domain Frailty)</b>                                                                                                                                                                                                                                                                                                                                                                                                                                                                                                                                                                                                                                                                                                                                                                                                                                                                                                                                                                                                              |                                                                                                                                                                                                                                                                                                                                        |
| Could you tell me a bit about yourself and what is important to you in your life /lives?                                                                                                                                                                                                                                                                                                                                                                                                                                                                                                                                                                                                                                                                                                                                                                                                                                                                                                                                                             | Who they are? Where they live? What do they do?<br>Support networks                                                                                                                                                                                                                                                                    |
| Does your health or personal situation impact on what is important to you?                                                                                                                                                                                                                                                                                                                                                                                                                                                                                                                                                                                                                                                                                                                                                                                                                                                                                                                                                                           | How? why?)                                                                                                                                                                                                                                                                                                                             |
| <b>Appointments with health and care staff (NASS Domains CGA, Organisation, Intended adopters and Embedding)</b>                                                                                                                                                                                                                                                                                                                                                                                                                                                                                                                                                                                                                                                                                                                                                                                                                                                                                                                                     |                                                                                                                                                                                                                                                                                                                                        |
| Please can you think back to a recent appointment with a health or social care professional (such as a Dr or nurse), and tell me about what happened in that appointment                                                                                                                                                                                                                                                                                                                                                                                                                                                                                                                                                                                                                                                                                                                                                                                                                                                                             | Thinking about things like asking questions, checking your ability to do something, or taking any measurements? Did you get the chance to say anything such as what is important to you                                                                                                                                                |
| What did you think about how that appointment was conducted?                                                                                                                                                                                                                                                                                                                                                                                                                                                                                                                                                                                                                                                                                                                                                                                                                                                                                                                                                                                         | Whether they would have liked anything to have been done differently, or not done at all? what you would have liked to have happened? And why?                                                                                                                                                                                         |
| If an appointment went well, what were the things that were done, that made that a positive experience for you?                                                                                                                                                                                                                                                                                                                                                                                                                                                                                                                                                                                                                                                                                                                                                                                                                                                                                                                                      | Anything that could have been done differently?                                                                                                                                                                                                                                                                                        |
| Are you able to give me any examples of how the pandemic has changed how you engage with health and care staff?                                                                                                                                                                                                                                                                                                                                                                                                                                                                                                                                                                                                                                                                                                                                                                                                                                                                                                                                      | What has worked well for you? What hasn't worked so well?                                                                                                                                                                                                                                                                              |
| <b>Thinking ahead (NASS Domain Technology)</b>                                                                                                                                                                                                                                                                                                                                                                                                                                                                                                                                                                                                                                                                                                                                                                                                                                                                                                                                                                                                       |                                                                                                                                                                                                                                                                                                                                        |
| <p>We are exploring different ways health and care professionals might conduct appointments with older people or find out about a person's health. I am going to ask you your thoughts about different ways they could do this:</p> <ul style="list-style-type: none"> <li>• What do you think about appointments being done remotely; for example by telephone or video?</li> <li>• What do you think about using different ways of sharing information on their current health with staff; for example filling out questionnaires?</li> <li>• What do you think about using equipment that collects information about your health, for example taking your own blood pressure and sending results to your GP?</li> <li>• What do you think about using a mobile phone to share information about how you are doing; for example, a weekly phone check-in with health or care staff?</li> <li>• What do you think about using wearable technology, for example a pedometer or fitbit that collects data about your movement or exercise?</li> </ul> | What informs their thinking, any preferences, concerns or worries? Can you think of any other older people for whom these might not be appropriate, could they make things worse, What sort of problems may pose particular challenges? Could these be helpful or beneficial to older people? What might be needed to use effectively? |
| For those who might struggle with technologies, can you think of ways in which staff can best support them to ensure they can still access to the best possible care? <b>(NASS Domains-Embedding)</b>                                                                                                                                                                                                                                                                                                                                                                                                                                                                                                                                                                                                                                                                                                                                                                                                                                                | Who might struggle?                                                                                                                                                                                                                                                                                                                    |
| If we want to set up a new way of doing appointments using technology, what should we measure to see if the new way works? <b>(NASS Domain-Value Proposition)</b>                                                                                                                                                                                                                                                                                                                                                                                                                                                                                                                                                                                                                                                                                                                                                                                                                                                                                    |                                                                                                                                                                                                                                                                                                                                        |

58 Is there something else that I have not asked you about, that you would like to tell me about your health and healthcare?  
 59  
 60

Thank you.  
 DREAM

## Topic guide –Staff

**Researcher to introduce self, ask why participant interesting in taking part and orientate them as to what they will be discussing. Reminder re: confidentiality. They can pause, stop, or withdraw at any time.**

| Topic                                                                                                                                                                                                                                                                                                                                                                                                                                                                                                                                                                                                                                                                                                                                                                                                                                                                                                                                                                                                                                                                                | Prompts                                                                                                                                                                                                                                                                                                             |
|--------------------------------------------------------------------------------------------------------------------------------------------------------------------------------------------------------------------------------------------------------------------------------------------------------------------------------------------------------------------------------------------------------------------------------------------------------------------------------------------------------------------------------------------------------------------------------------------------------------------------------------------------------------------------------------------------------------------------------------------------------------------------------------------------------------------------------------------------------------------------------------------------------------------------------------------------------------------------------------------------------------------------------------------------------------------------------------|---------------------------------------------------------------------------------------------------------------------------------------------------------------------------------------------------------------------------------------------------------------------------------------------------------------------|
| <b>Background (NASS Domain Frailty and CGA)</b>                                                                                                                                                                                                                                                                                                                                                                                                                                                                                                                                                                                                                                                                                                                                                                                                                                                                                                                                                                                                                                      |                                                                                                                                                                                                                                                                                                                     |
| Please can you tell me a bit about your professional background and current role?                                                                                                                                                                                                                                                                                                                                                                                                                                                                                                                                                                                                                                                                                                                                                                                                                                                                                                                                                                                                    | How long and it what capacity have you been working with older people? Describe the setting you work in.                                                                                                                                                                                                            |
| Please can you tell me a bit about the older people that you work with and the kinds of things that you do with them in consultations                                                                                                                                                                                                                                                                                                                                                                                                                                                                                                                                                                                                                                                                                                                                                                                                                                                                                                                                                | Asking them questions, checking their ability to do something, or taking any measurements?; do you do things differently if they are acutely unwell vs proactive/preventative care; how do you tailor assessments and care to meet individual needs/what is important to them                                       |
| <b>Current assessments (NASS Domains CGA, Organisation, Intended adopters and Embedding)</b>                                                                                                                                                                                                                                                                                                                                                                                                                                                                                                                                                                                                                                                                                                                                                                                                                                                                                                                                                                                         |                                                                                                                                                                                                                                                                                                                     |
| What do you think older people/carers think about what you assess and how you conduct assessments (CGA)                                                                                                                                                                                                                                                                                                                                                                                                                                                                                                                                                                                                                                                                                                                                                                                                                                                                                                                                                                              | Do you think that they might like anything to be done differently, or not done at all?                                                                                                                                                                                                                              |
| If a consultation goes particularly well, what is it that you have done, that might have made that a positive experience for them?                                                                                                                                                                                                                                                                                                                                                                                                                                                                                                                                                                                                                                                                                                                                                                                                                                                                                                                                                   | Is there anything that you might do differently? If yes: can you please describe in what circumstances you might do this? And why?                                                                                                                                                                                  |
| Are you able to give me any examples of how the pandemic has changed how you engage with older people specifically?                                                                                                                                                                                                                                                                                                                                                                                                                                                                                                                                                                                                                                                                                                                                                                                                                                                                                                                                                                  | What has worked well for you? and what hasn't worked so well                                                                                                                                                                                                                                                        |
| <b>Thinking ahead (NASS Domain Technology)</b>                                                                                                                                                                                                                                                                                                                                                                                                                                                                                                                                                                                                                                                                                                                                                                                                                                                                                                                                                                                                                                       |                                                                                                                                                                                                                                                                                                                     |
| Can you think of any ways in which you might be able to undertake more effective assessments with older people?                                                                                                                                                                                                                                                                                                                                                                                                                                                                                                                                                                                                                                                                                                                                                                                                                                                                                                                                                                      | What are they hoping to achieve? What is stopping them?                                                                                                                                                                                                                                                             |
| One way that assessments might be undertaken different, is by them being undertaken remotely or by using different types of technology, and I am going to ask you your thoughts on some examples: <ul style="list-style-type: none"> <li>• What do you think conducting assessments with older people remotely; for example by telephone or video?</li> <li>• What do you think about using different ways that older people might share their information with you; for example filling out questionnaires?</li> <li>• What do you think about using equipment that collects older people's information, for example taking their own blood pressure and sending to you, you will have access to the results?</li> <li>• What do you think about older people using a mobile phone to share information about how they are doing with you; for example, a weekly phone check-in with healthcare staff?</li> <li>• What do you think about older people using wearable technology, for example a pedometer or fitbit that collects data about their movement or exercise?</li> </ul> | Prompt as to what informs their thinking, any preferences, and concerns or challenges eg any people/groups that not appropriate for/make things worse? How do you avoid inequalities in access to care<br><br>When might these be helpful or beneficial to older people? What might they need to engage effectively |
| If we were to evaluate a new intervention for older people or, what do you think that we should measure to see if it works? <b>(NASS Domain-Value Proposition)</b>                                                                                                                                                                                                                                                                                                                                                                                                                                                                                                                                                                                                                                                                                                                                                                                                                                                                                                                   | How could we measure the impact of a new intervention?                                                                                                                                                                                                                                                              |

Is there something else that I have not asked you about, that you would like to tell me about?

**Thank you**



## COREQ (COnsolidated criteria for REporting Qualitative research) Checklist

A checklist of items that should be included in reports of qualitative research. You must report the page number in your manuscript where you consider each of the items listed in this checklist. If you have not included this information, either revise your manuscript accordingly before submitting or note N/A.

| Topic                                          | Item No. | Guide Questions/Description                                                                                                                              | Reported on Section/Page No.                              |
|------------------------------------------------|----------|----------------------------------------------------------------------------------------------------------------------------------------------------------|-----------------------------------------------------------|
| <b>Domain 1: Research team and reflexivity</b> |          |                                                                                                                                                          |                                                           |
| <i>Personal characteristics</i>                |          |                                                                                                                                                          |                                                           |
| Interviewer/facilitator                        | 1        | Which author/s conducted the interview or focus group?                                                                                                   | Methods/Design/ P4                                        |
| Credentials                                    | 2        | What were the researcher's credentials? E.g. PhD, MD                                                                                                     | Methods/Design/P4                                         |
| Occupation                                     | 3        | What was their occupation at the time of the study?                                                                                                      | Methods/Design/P4-5                                       |
| Gender                                         | 4        | Was the researcher male or female?                                                                                                                       | Methods/Design/P4                                         |
| Experience and training                        | 5        | What experience or training did the researcher have?                                                                                                     | Methods/Design/ P4-5                                      |
| <i>Relationship with participants</i>          |          |                                                                                                                                                          |                                                           |
| Relationship established                       | 6        | Was a relationship established prior to study commencement?                                                                                              | Methods/Data collection / P6                              |
| Participant knowledge of the interviewer       | 7        | What did the participants know about the researcher? e.g. personal goals, reasons for doing the research                                                 | Methods/Data collection / P6 and additional files 1 and 2 |
| Interviewer characteristics                    | 8        | What characteristics were reported about the interviewer/facilitator? e.g. Bias, assumptions, reasons and interests in the research topic                | Methods/Design/ P4                                        |
| <b>Domain 2: Study design</b>                  |          |                                                                                                                                                          |                                                           |
| <i>Theoretical framework</i>                   |          |                                                                                                                                                          |                                                           |
| Methodological orientation and Theory          | 9        | What methodological orientation was stated to underpin the study? e.g. grounded theory, discourse analysis, ethnography, phenomenology, content analysis | Methods/ Data collection and Data analysis/ P6, P7        |
| <i>Participant selection</i>                   |          |                                                                                                                                                          |                                                           |
| Sampling                                       | 10       | How were participants selected? e.g. purposive, convenience, consecutive, snowball                                                                       | Methods/Sampling and recruitment/ P5                      |
| Method of approach                             | 11       | How were participants approached? e.g. face-to-face, telephone, mail, email                                                                              | Methods/Sampling and recruitment/ P5                      |
| Sample size                                    | 12       | How many participants were in the study?                                                                                                                 | Results/older people and Healthcare professionals/ P7-9   |
| Non-participation                              | 13       | How many people refused to participate or dropped out? Reasons?                                                                                          | Methods/Sampling and recruitment/ P5                      |
| <i>Setting</i>                                 |          |                                                                                                                                                          |                                                           |
| Setting of data collection                     | 14       | Where was the data collected? e.g. home, clinic, workplace                                                                                               | Methods/Data collection/ P6                               |
| Presence of nonparticipants                    | 15       | Was anyone else present besides the participants and researchers?                                                                                        | Results/older people/ P7                                  |

|    |                                        |                 |                                                                                                                                    |                                                         |
|----|----------------------------------------|-----------------|------------------------------------------------------------------------------------------------------------------------------------|---------------------------------------------------------|
| 1  | Description of sample                  | 16              | What are the important characteristics of the sample? e.g. demographic data, date                                                  | Results/older people and Healthcare professionals/ P7-9 |
| 2  |                                        |                 |                                                                                                                                    |                                                         |
| 3  |                                        |                 |                                                                                                                                    |                                                         |
| 4  | <i>Data collection</i>                 |                 |                                                                                                                                    |                                                         |
| 5  | Interview guide                        | 17              | Were questions, prompts, guides provided by the authors? Was it pilot tested?                                                      | Methods/ Data collection/ P6                            |
| 6  |                                        |                 |                                                                                                                                    |                                                         |
| 7  | Repeat interviews                      | 18              | Were repeat inter views carried out? If yes, how many?                                                                             | NA                                                      |
| 8  |                                        |                 |                                                                                                                                    |                                                         |
| 9  | Audio/visual recording                 | 19              | Did the research use audio or visual recording to collect the data?                                                                | Methods/ Data collection/ P6                            |
| 10 |                                        |                 |                                                                                                                                    |                                                         |
| 11 | Field notes                            | 20              | Were field notes made during and/or after the inter view or focus group?                                                           | Methods/ Data collection/ P6                            |
| 12 |                                        |                 |                                                                                                                                    |                                                         |
| 13 | Duration                               | 21              | What was the duration of the inter views or focus group?                                                                           | Results/older people and Healthcare professionals/ P7-9 |
| 14 |                                        |                 |                                                                                                                                    |                                                         |
| 15 | Data saturation                        | 22              | Was data saturation discussed?                                                                                                     | Methods/Sampling and recruitment/ P5                    |
| 16 |                                        |                 |                                                                                                                                    |                                                         |
| 17 | Transcripts returned                   | 23              | Were transcripts returned to participants for comment and/or                                                                       | NA                                                      |
| 18 |                                        |                 |                                                                                                                                    |                                                         |
| 19 |                                        |                 |                                                                                                                                    |                                                         |
| 20 |                                        |                 |                                                                                                                                    |                                                         |
| 21 | <b>Topic</b>                           | <b>Item No.</b> | <b>Guide Questions/Description</b>                                                                                                 | <b>Reported on Page No.</b>                             |
| 22 |                                        |                 |                                                                                                                                    |                                                         |
| 23 |                                        |                 | correction?                                                                                                                        | NA                                                      |
| 24 |                                        |                 |                                                                                                                                    |                                                         |
| 25 | <b>Domain 3: analysis and findings</b> |                 |                                                                                                                                    |                                                         |
| 26 |                                        |                 |                                                                                                                                    |                                                         |
| 27 | <i>Data analysis</i>                   |                 |                                                                                                                                    |                                                         |
| 28 |                                        |                 |                                                                                                                                    |                                                         |
| 29 | Number of data coders                  | 24              | How many data coders coded the data?                                                                                               | Methods/ Data analysis/ P7                              |
| 30 |                                        |                 |                                                                                                                                    |                                                         |
| 31 | Description of the coding tree         | 25              | Did authors provide a description of the coding tree?                                                                              | Methods/ Data analysis/ P7                              |
| 32 |                                        |                 |                                                                                                                                    |                                                         |
| 33 | Derivation of themes                   | 26              | Were themes identified in advance or derived from the data?                                                                        | Methods/ Data analysis/ P7                              |
| 34 |                                        |                 |                                                                                                                                    |                                                         |
| 35 | Software                               | 27              | What software, if applicable, was used to manage the data?                                                                         | Methods/ Data analysis/ P7                              |
| 36 |                                        |                 |                                                                                                                                    |                                                         |
| 37 | Participant checking                   | 28              | Did participants provide feedback on the findings?                                                                                 | NA                                                      |
| 38 |                                        |                 |                                                                                                                                    |                                                         |
| 39 |                                        |                 |                                                                                                                                    |                                                         |
| 40 | <i>Reporting</i>                       |                 |                                                                                                                                    |                                                         |
| 41 | Quotations presented                   | 29              | Were participant quotations presented to illustrate the themes/findings?<br>Was each quotation identified? e.g. participant number | Results/ P9-16                                          |
| 42 |                                        |                 |                                                                                                                                    |                                                         |
| 43 | Data and findings consistent           | 30              | Was there consistency between the data presented and the findings?                                                                 | Results/ P9-16 and Discussion/ P16-20                   |
| 44 |                                        |                 |                                                                                                                                    |                                                         |
| 45 | Clarity of major themes                | 31              | Were major themes clearly presented in the findings?                                                                               | Results/ P9-16                                          |
| 46 |                                        |                 |                                                                                                                                    |                                                         |
| 47 | Clarity of minor themes                | 32              | Is there a description of diverse cases or discussion of minor themes?                                                             | Results/ P9-16                                          |
| 48 |                                        |                 |                                                                                                                                    |                                                         |
| 49 |                                        |                 |                                                                                                                                    |                                                         |
| 50 |                                        |                 |                                                                                                                                    |                                                         |

Developed from: Tong A, Sainsbury P, Craig J. Consolidated criteria for reporting qualitative research (COREQ): a 32-item checklist for interviews and focus groups. *International Journal for Quality in Health Care*. 2007. Volume 19, Number 6: pp. 349 – 357

**Once you have completed this checklist, please save a copy and upload it as part of your submission. DO NOT include this checklist as part of the main manuscript document. It must be uploaded as a separate file.**
