# Supplementary material for: How can we improve Comprehensive Geriatric Assessment for older people living with frailty in primary care and community settings? A qualitative study
Source: PubMed Central journal article supplement — BMJ Open. 2024 Mar 28;14(3):e081304. doi: 10.1136/bmjopen-2023-081304 (PMC10982782; doi:10.1136/bmjopen-2023-081304), 2024-03-28
Supplement: bmjopen-2023-081304supp002.pdf [file bmjopen-2023-081304supp002.pdf]

## Topic guide –Staff

**Researcher to introduce self, ask why participant interesting in taking part and orientate then as to what they will be discussing. Reminder re: confidentiality. They can pause, stop, or withdraw at any time.**

| Topic                                                                                                                                                                                                                                                                                                                                                                                                                                                                                                                                                                                                                                                                                                                                                                                                                                                                                                                                                                                                                                                                                | Prompts                                                                                                                                                                                                                                                                                                                    |
|--------------------------------------------------------------------------------------------------------------------------------------------------------------------------------------------------------------------------------------------------------------------------------------------------------------------------------------------------------------------------------------------------------------------------------------------------------------------------------------------------------------------------------------------------------------------------------------------------------------------------------------------------------------------------------------------------------------------------------------------------------------------------------------------------------------------------------------------------------------------------------------------------------------------------------------------------------------------------------------------------------------------------------------------------------------------------------------|----------------------------------------------------------------------------------------------------------------------------------------------------------------------------------------------------------------------------------------------------------------------------------------------------------------------------|
| <b>Background (NASS Domain Frailty and CGA)</b>                                                                                                                                                                                                                                                                                                                                                                                                                                                                                                                                                                                                                                                                                                                                                                                                                                                                                                                                                                                                                                      |                                                                                                                                                                                                                                                                                                                            |
| Please can you tell me a bit about your professional background and current role?                                                                                                                                                                                                                                                                                                                                                                                                                                                                                                                                                                                                                                                                                                                                                                                                                                                                                                                                                                                                    | How long and it what capacity have you been working with older people? Describe the setting you work in.                                                                                                                                                                                                                   |
| Please can you tell me a bit about the older people that you work with and the kinds of things that you do with them in consultations                                                                                                                                                                                                                                                                                                                                                                                                                                                                                                                                                                                                                                                                                                                                                                                                                                                                                                                                                | Asking them questions, checking their ability to do something, or taking any measurements?; do you do things differently if they are acutely unwell vs proactive/preventative care; how do you tailor assessments and care to meet individual needs/what is important to them                                              |
| <b>Current assessments (NASS Domains CGA, Organisation, Intended adopters and Embedding)</b>                                                                                                                                                                                                                                                                                                                                                                                                                                                                                                                                                                                                                                                                                                                                                                                                                                                                                                                                                                                         |                                                                                                                                                                                                                                                                                                                            |
| What do you think older people/carers think about what you assess and how you conduct assessments (CGA)                                                                                                                                                                                                                                                                                                                                                                                                                                                                                                                                                                                                                                                                                                                                                                                                                                                                                                                                                                              | Do you think that they might like anything to be done differently, or not done at all?                                                                                                                                                                                                                                     |
| If a consultation goes particularly well, what is it that you have done, that might have made that a positive experience for them?                                                                                                                                                                                                                                                                                                                                                                                                                                                                                                                                                                                                                                                                                                                                                                                                                                                                                                                                                   | Is there anything that you might do differently? If yes: can you please describe in what circumstances you might do this? And why?                                                                                                                                                                                         |
| Are you able to give me any examples of how the pandemic has changed how you engage with older people specifically?                                                                                                                                                                                                                                                                                                                                                                                                                                                                                                                                                                                                                                                                                                                                                                                                                                                                                                                                                                  | What has worked well for you? and what hasn't worked so well                                                                                                                                                                                                                                                               |
| <b>Thinking ahead (NASS Domain Technology)</b>                                                                                                                                                                                                                                                                                                                                                                                                                                                                                                                                                                                                                                                                                                                                                                                                                                                                                                                                                                                                                                       |                                                                                                                                                                                                                                                                                                                            |
| Can you think of any ways in which you might be able to undertake more effective assessments with older people?                                                                                                                                                                                                                                                                                                                                                                                                                                                                                                                                                                                                                                                                                                                                                                                                                                                                                                                                                                      | What are they hoping to achieve? What is stopping them?                                                                                                                                                                                                                                                                    |
| One way that assessments might be undertaken different, is by them being undertaken remotely or by using different types of technology, and I am going to ask you your thoughts on some examples: <ul style="list-style-type: none"> <li>• What do you think conducting assessments with older people remotely; for example by telephone or video?</li> <li>• What do you think about using different ways that older people might share their information with you; for example filling out questionnaires?</li> <li>• What do you think about using equipment that collects older people's information, for example taking their own blood pressure and sending to you, you will have access to the results?</li> <li>• What do you think about older people using a mobile phone to share information about how they are doing with you; for example, a weekly phone check-in with healthcare staff?</li> <li>• What do you think about older people using wearable technology, for example a pedometer or fitbit that collects data about their movement or exercise?</li> </ul> | <p>Prompt as to what informs their thinking, any preferences, and concerns or challenges eg any people/groups that not appropriate for/make things worse? How do you avoid inequalities in access to care</p> <p>When might these be helpful or beneficial to older people? What might they need to engage effectively</p> |
| If we were to evaluate a new intervention for older people or, what do you think that we should measure to see if it works? ( <b>NASS Domain-Value Proposition</b> )                                                                                                                                                                                                                                                                                                                                                                                                                                                                                                                                                                                                                                                                                                                                                                                                                                                                                                                 | How could we measure the impact of a new intervention?                                                                                                                                                                                                                                                                     |

Is there something else that I have not asked you about, that you would like to tell me about?

**Thank you**
